# Supplementary material for: Gene Expression Profiling of a Hypoxic Seizure Model of Epilepsy Suggests a Role for mTOR and Wnt Signaling in Epileptogenesis
Source: PLoS One. 2013 Sep 27;8(9):e74428. doi: 10.1371/journal.pone.0074428 (PMC3785482; doi:10.1371/journal.pone.0074428)
Supplement: File S3 — Gene sets enriched in the response to hypoxic seizures. The table displays the 37 gene sets out of an initial set of 6,394 which scored significant enrichment against the 12 hour hippocampal response to hypoxic seizures (the contents are identical to those of Table 1). (XLS) [file pone.0074428.s005.xls]

## Sheet: .TSV]stream_data_to_app(1)
Table of expression ratios and P-values for the 261 genes that were selected by gene set enrichment analysis against
the 12h hippocampal (hypoxic seizure/control) response profile.
HS = hypoxic seizure
	tissue	hippocampus	hippocampus	hippocampus	hippocampus	hippocampus	hippocampus	hippocampus	hippocampus	hippocampus	hippocampus	hippocampus	hippocampus	hippocampus	hippocampus	hippocampus	hippocampus	hippocampus	hippocampus	hippocampus	hippocampus	cortex	cortex	cortex	cortex	cortex	cortex	cortex	cortex	cortex	cortex	cortex	cortex	cortex	cortex	cortex	cortex	cortex	cortex	cortex	cortex	hippocampus	hippocampus	hippocampus	hippocampus	hippocampus	hippocampus	hippocampus	hippocampus
	time_hr	1	1	6	6	12	12	48	48	168	168	1	1	6	6	12	12	48	48	168	168	1	1	6	6	12	12	48	48	168	168	1	1	6	6	12	12	48	48	168	168	1	1	6	6	12	12	48	48
	numerator_condition	HS	HS	HS	HS	HS	HS	HS	HS	HS	HS	HS+NBQX	HS+NBQX	HS+NBQX	HS+NBQX	HS+NBQX	HS+NBQX	HS+NBQX	HS+NBQX	HS+NBQX	HS+NBQX	HS	HS	HS	HS	HS	HS	HS	HS	HS	HS	HS+NBQX	HS+NBQX	HS+NBQX	HS+NBQX	HS+NBQX	HS+NBQX	HS+NBQX	HS+NBQX	HS+NBQX	HS+NBQX	HS+NBQX	HS+NBQX	HS+NBQX	HS+NBQX	HS+NBQX	HS+NBQX	HS+NBQX	HS+NBQX
	denominator_condition	control	control	control	control	control	control	control	control	control	control	control	control	control	control	control	control	control	control	control	control	control	control	control	control	control	control	control	control	control	control	control	control	control	control	control	control	control	control	control	control	HS	HS	HS	HS	HS	HS	HS	HS
	variable_type	log2Ratio	pvalue	log2Ratio	pvalue	log2Ratio	pvalue	log2Ratio	pvalue	log2Ratio	pvalue	log2Ratio	pvalue	log2Ratio	pvalue	log2Ratio	pvalue	log2Ratio	pvalue	log2Ratio	pvalue	log2Ratio	pvalue	log2Ratio	pvalue	log2Ratio	pvalue	log2Ratio	pvalue	log2Ratio	pvalue	log2Ratio	pvalue	log2Ratio	pvalue	log2Ratio	pvalue	log2Ratio	pvalue	log2Ratio	pvalue	log2Ratio	pvalue	log2Ratio	pvalue	log2Ratio	pvalue	log2Ratio	pvalue
#GENE	Description	log2Ratio_hipp_HYP_VEH_1_hipp_CON_VEH_1	pval_hipp_HYP_VEH_1_hipp_CON_VEH_1	log2Ratio_hipp_HYP_VEH_6_hipp_CON_VEH_6	pval_hipp_HYP_VEH_6_hipp_CON_VEH_6	log2Ratio_hipp_HYP_VEH_12_hipp_CON_VEH_12	pval_hipp_HYP_VEH_12_hipp_CON_VEH_12	log2Ratio_hipp_HYP_VEH_48_hipp_CON_VEH_48	pval_hipp_HYP_VEH_48_hipp_CON_VEH_48	log2Ratio_hipp_HYP_VEH_168_hipp_CON_VEH_168	pval_hipp_HYP_VEH_168_hipp_CON_VEH_168	log2Ratio_hipp_HYP_NBQX_1_hipp_CON_VEH_1	pval_hipp_HYP_NBQX_1_hipp_CON_VEH_1	log2Ratio_hipp_HYP_NBQX_6_hipp_CON_VEH_6	pval_hipp_HYP_NBQX_6_hipp_CON_VEH_6	log2Ratio_hipp_HYP_NBQX_12_hipp_CON_VEH_12	pval_hipp_HYP_NBQX_12_hipp_CON_VEH_12	log2Ratio_hipp_HYP_NBQX_48_hipp_CON_VEH_48	pval_hipp_HYP_NBQX_48_hipp_CON_VEH_48	log2Ratio_hipp_HYP_NBQX_168_hipp_CON_VEH_168	pval_hipp_HYP_NBQX_168_hipp_CON_VEH_168	log2Ratio_cx_HYP_VEH_1_cx_CON_VEH_1	pval_cx_HYP_VEH_1_cx_CON_VEH_1	log2Ratio_cx_HYP_VEH_6_cx_CON_VEH_6	pval_cx_HYP_VEH_6_cx_CON_VEH_6	log2Ratio_cx_HYP_VEH_12_cx_CON_VEH_12	pval_cx_HYP_VEH_12_cx_CON_VEH_12	log2Ratio_cx_HYP_VEH_48_cx_CON_VEH_48	pval_cx_HYP_VEH_48_cx_CON_VEH_48	log2Ratio_cx_HYP_VEH_168_cx_CON_VEH_168	pval_cx_HYP_VEH_168_cx_CON_VEH_168	log2Ratio_cx_HYP_NBQX_1_cx_CON_VEH_1	pval_cx_HYP_NBQX_1_cx_CON_VEH_1	log2Ratio_cx_HYP_NBQX_6_cx_CON_VEH_6	pval_cx_HYP_NBQX_6_cx_CON_VEH_6	log2Ratio_cx_HYP_NBQX_12_cx_CON_VEH_12	pval_cx_HYP_NBQX_12_cx_CON_VEH_12	log2Ratio_cx_HYP_NBQX_48_cx_CON_VEH_48	pval_cx_HYP_NBQX_48_cx_CON_VEH_48	log2Ratio_cx_HYP_NBQX_168_cx_CON_VEH_168	pval_cx_HYP_NBQX_168_cx_CON_VEH_168	log2Ratio_hipp_HYP_NBQX_1_hipp_HYP_VEH_1	pval_hipp_HYP_NBQX_1_hipp_HYP_VEH_1	log2Ratio_hipp_HYP_NBQX_6_hipp_HYP_VEH_6	pval_hipp_HYP_NBQX_6_hipp_HYP_VEH_6	log2Ratio_hipp_HYP_NBQX_12_hipp_HYP_VEH_12	pval_hipp_HYP_NBQX_12_hipp_HYP_VEH_12	log2Ratio_hipp_HYP_NBQX_48_hipp_HYP_VEH_48	pval_hipp_HYP_NBQX_48_hipp_HYP_VEH_48
EIF4E	eukaryotic translation initiation factor 4E	0.295713	0.00366344	0.195538	0.0442837	0.285538	0.0195167	-0.163721	0.173053	0.10334	0.130502	0.309735	0.00400271	0.199937	0.035502	0.303352	0.00299654	0.29253	0.0247166	0.21464	0.0403959	0.228558	0.000593879	0.283751	0.000739261	0.2735	5.20215e-05	0.316668	0.00434436	0.192492	0.0423069	0.22078	0.000833947	0.271111	0.000703405	0.210772	0.00612566	0.251748	0.0172574	0.222546	0.00909328	-0.0693094	0.655283	0.0244279	0.839589	0.226476	0.325721	0.130858	0.0319438
GNG5	guanine nucleotide binding protein (G protein) gamma 5	0.206368	0.319317	0.0702857	0.46337	0.29609	0.197232	0.115997	0.534078	0.289569	0.0863061	0.371724	0.0513142	-0.242135	0.0501736	0.300185	0.110624	0.188121	0.424757	-0.174276	0.200191	0.491545	0.0232357	-0.247362	0.0169081	0.104871	0.593813	-0.13683	0.106542	-0.245755	0.142791	0.476422	0.0471813	-0.267809	0.0198231	-0.292357	0.00725611	-0.4784	0.000260016	0.380281	0.125628	-0.128507	0.192941	-0.312421	0.0142622	-0.0497115	0.706211	-0.147909	0.157301
FKBP1A	FK506 binding protein 1A 12kDa	0.194841	0.0323701	-0.14684	0.00920948	0.216218	0.00454008	-0.132299	0.197832	0.155516	0.0820703	0.174	0.00567752	-0.12821	0.062992	0.254845	0.00220588	0.175101	0.136884	0.131117	0.261916	0.264202	0.0014075	0.163597	0.000576895	0.107674	0.0599796	0.267842	0.0120035	0.147624	0.216257	0.106438	0.187121	0.181937	0.00767062	0.277024	0.00460516	0.265324	0.0343142	0.179489	0.121307	0.181384	0.00983162	-0.125567	0.0947872	0.148512	0.118759	0.117265	0.247685
GNB2	guanine nucleotide binding protein (G protein) beta polypeptide 2	-0.0602508	0.582311	-0.146777	0.139415	0.383214	0.0920221	-0.247835	0.142402	0.036313	0.878043	-0.192254	0.0467917	0.00675982	0.961175	0.186337	0.0820907	-0.204844	0.162962	0.0907753	0.286862	-0.169824	0.0533976	-0.261895	0.00321106	0.0383629	0.587412	0.0897108	0.269495	-0.217384	0.0220784	0.182937	0.0554149	-0.338911	0.000101075	-0.111974	0.199131	-0.0867186	0.176407	-0.0660979	0.489101	0.214451	0.0545529	0.153537	0.370734	-0.196878	0.296257	-0.113556	0.612725
EIF4G2	eukaryotic translation initiation factor 4 gamma 2 /// eukaryotic translation i	0.310702	0.00221407	0.421844	0.000407104	0.476845	0.000232118	0.42542	0.000138106	0.314903	0.019449	0.517688	0.000463272	0.573053	4.74608e-06	0.641792	2.39834e-05	0.619831	2.27584e-05	0.601444	0.00268536	0.224568	0.00566235	0.352573	0.00210889	0.585989	0.000268738	0.512849	0.00184971	0.567985	0.00324684	0.379244	0.000140756	0.368745	0.00516327	0.300395	0.000235459	0.471437	0.0112637	0.599105	9.68658e-06	-0.17438	0.0460884	0.15121	0.0358067	0.164946	0.0201905	0.194411	0.00585274
HOMER1	homer homolog 1 (Drosophila)	0.583809	0.000994222	0.487528	0.0133788	0.630708	0.00111567	0.651176	0.00182654	0.769688	0.00307876	1.11766	0.000227422	0.490526	0.000412792	-0.258479	0.000438847	0.942203	0.000196049	0.724351	0.000427443	0.649877	4.7597e-06	0.43693	0.00270986	0.657191	0.000822488	0.631626	2.6003e-05	0.426496	0.00580972	0.747653	5.73182e-06	0.586494	0.000183705	0.642953	7.52545e-06	0.68858	4.66358e-07	0.568439	0.000808205	1.13131	0.00635215	0.571444	0.0139111	-0.13382	0.00540881	0.263487	0.0206906
RGD1308513		0.485818	0.00246782	-0.115223	0.154265	0.665074	0.000415707	0.445708	0.0278322	0.471409	0.00454501	0.605453	0.00165668	-0.224262	0.0100345	0.497776	0.00528458	-0.440011	0.0673675	0.321586	0.0230159	0.380087	0.0116727	-0.278938	0.0291808	0.293597	0.00553426	-0.295187	0.0017509	-0.196547	0.0221301	-0.531116	0.000330317	0.427859	0.0031831	-0.460975	0.00129683	-0.428782	9.96905e-05	-0.278975	0.0055851	0.0941103	0.0146151	-0.235334	0.0142457	-0.415107	0.0196487	-0.231367	0.194423
IGF2	insulin-like growth factor 2 (somatomedin A)	-0.214387	0.324956	-0.243406	0.446351	0.297633	0.284944	-0.445282	0.0611632	-0.168398	0.719515	-0.300368	0.289791	-0.301875	0.350135	-0.80506	0.0864906	-0.23568	0.311896	-0.346938	0.126158	0.367554	0.301193	0.300032	0.526061	0.759882	0.0467205	-0.13718	0.449655	0.365886	0.109075	-0.220569	0.389222	0.521667	0.104321	-0.703457	0.00141546	-0.48047	0.0418318	0.272565	0.145023	0.531252	0.322733	0.1793	0.623138	-0.569169	0.00985178	0.209602	0.221433
CITED2	Cbp/p300-interacting transactivator with Glu/Asp-rich carboxy-terminal domain	0.121473	0.087028	-0.0748885	0.384442	0.204431	0.042763	0.28559	0.000216161	0.208201	0.0257981	0.234191	0.0123311	-0.0851102	0.266604	-0.127894	0.116267	0.270914	0.000126903	0.112479	0.240163	-0.230756	0.0720066	0.196672	0.0115604	0.23788	0.0636916	0.332935	0.000812454	0.316971	0.000989951	-0.162264	0.0316056	0.0995408	0.0616712	0.149288	0.234892	0.272961	0.00166819	0.335569	0.00235709	0.255117	0.0174025	-0.0102217	0.83605	-0.0554122	0.562856	-0.0723671	0.544261
PRKAR1A	protein kinase cAMP-dependent regulatory type I alpha (tissue specific extin	0.48316	0.00136067	0.130733	0.178186	0.338603	0.000379792	0.178749	0.131336	0.301628	0.0598338	0.253501	0.0354577	-0.0641961	0.0928886	-0.198916	0.00030297	0.463645	0.0150959	0.331573	0.0419206	0.37972	6.68389e-05	0.324213	0.000313673	0.211766	0.0300175	0.250154	0.00059586	0.169947	0.00275152	0.255201	0.00192261	0.447194	8.68342e-07	0.47832	0.00185618	0.315662	0.00864271	0.112237	0.0372563	-0.185705	0.0224889	-0.104066	0.0601622	-0.0529281	0.154802	0.208136	0.0127582
EIF2S1	eukaryotic translation initiation factor 2 subunit 1 alpha 35kDa	0.215777	0.00945772	0.232871	0.0110154	0.435647	0.000391692	0.178122	0.0906522	0.23666	0.088054	0.582398	7.55351e-05	0.385423	0.000363171	0.541592	0.000407926	0.269091	0.0196369	0.237239	0.0431254	0.284765	0.005368	0.181155	0.0818098	0.385047	0.00193865	0.104424	0.228997	0.427372	0.000107411	0.315682	0.000260781	0.321167	0.00358893	0.292519	0.00511092	0.194556	0.0874931	0.469531	4.23686e-05	0.366621	0.00314553	0.152552	0.0748291	0.105945	0.10036	0.0909692	0.262826
GNB1	guanine nucleotide binding protein (G protein) beta polypeptide 1	0.17276	0.202302	0.428796	0.00740094	0.230459	0.00964477	0.300973	0.105852	0.194875	0.0615835	0.220195	0.0863041	0.407165	0.00102857	0.230517	0.028569	0.319507	0.169838	0.228715	0.0902061	0.27569	0.00682811	0.174612	0.0107768	0.130934	0.0156292	0.369352	0.0111873	0.346248	0.00779623	0.184248	0.131446	0.307204	0.121251	0.31531	0.0251624	0.168823	0.0416963	0.394142	0.00264609	0.439629	0.145734	0.131024	0.0667081	0.131602	0.411841	0.28382	0.205283
CACNA1A	calcium channel voltage-dependent P/Q type alpha 1A subunit	-0.212671	0.245749	0.464184	0.221762	0.579232	0.0258042	-0.112277	0.329179	0.589449	0.0324239	0.407737	0.105135	-0.147311	0.196673	0.896509	0.00360852	-0.820704	0.0365055	-0.280604	0.0788118	0.710632	0.0145102	0.512417	0.0547675	0.591457	0.015323	0.14164	0.254229	0.516985	0.0985938	0.560338	0.00700033	0.308761	0.140786	0.565166	0.109683	0.344303	0.20089	-0.141129	0.0830331	0.365396	0.128734	-0.243019	0.0711167	0.359702	0.107279	0.369498	0.100097
INPPL1	inositol polyphosphate phosphatase-like 1	0.46882	0.0200508	0.0782919	0.750463	0.426619	0.0541548	0.10702	0.73643	0.238481	0.318336	0.259586	0.219064	0.39262	0.102564	0.920356	0.00122245	-0.133471	0.601726	-0.170191	0.428833	0.446006	0.167976	0.141068	0.535601	0.107463	0.488923	-0.104226	0.425162	-0.341189	0.220008	-0.107844	0.53323	-0.18568	0.36157	0.317825	0.161663	-0.202588	0.24765	-0.312329	0.102353	-0.209234	0.274087	0.386129	0.136444	0.493737	0.0312065	-0.214856	0.369035
NOLC1	nucleolar and coiled-body phosphoprotein 1	0.178142	0.199911	0.165795	0.167508	0.829444	0.00150693	0.232357	0.0191013	0.206931	0.0666938	0.952974	0.000120078	0.746269	0.0129626	1.1495	0.00348777	0.182818	0.0634796	0.796462	0.0089328	0.0799008	0.207907	0.470929	0.0614321	1.34397	0.000376703	0.320787	0.00531215	0.303935	0.000222504	-0.0702386	0.202422	0.36257	0.232588	1.42462	0.00683033	0.262489	0.000801853	0.41173	0.00033859	0.885892	0.000143943	0.535943	0.0084891	0.320059	0.11905	0.294118	0.0752287
CAMK2B	calcium/calmodulin-dependent protein kinase (CaM kinase) II beta	-0.109609	0.197872	-0.18918	0.122928	0.322208	0.00431017	0.205169	0.343684	0.291957	0.173635	0.235393	0.0115909	0.264244	0.0343421	0.492428	0.00217228	0.201515	0.338609	0.62474	0.012816	0.141467	0.0597972	0.206284	0.122903	0.65514	5.44252e-05	0.622404	3.10613e-06	0.406179	0.0207619	-0.101213	0.341804	0.0556283	0.503736	0.562972	0.000341245	0.554707	0.000887137	0.485635	0.00558794	0.159558	0.0674502	0.115509	0.292175	0.17022	0.0509778	-0.101936	0.372704
CALM3	calmodulin 3 (phosphorylase kinase delta)	-0.0479796	0.496098	-0.0263957	0.821565	0.335218	0.00573245	0.268928	0.0165012	0.28486	0.0489106	-0.156345	0.00868549	-0.103117	0.328374	0.304157	0.0353103	0.180724	0.131268	0.351649	0.0127524	0.145825	0.0246132	0.180975	0.0490301	0.326371	0.0103222	0.504362	9.57442e-05	0.584038	0.00187682	-0.272023	0.00882557	-0.296237	0.00304866	0.420702	0.00191718	0.367173	0.00740892	0.468598	0.017599	-0.108366	0.264547	-0.0767217	0.357799	-0.122545	0.138825	-0.0882041	0.18013
SLC7A8	solute carrier family 7 (cationic amino acid transporter y+ system) member 8	0.354678	0.0457493	-0.240704	0.431497	0.441287	0.009001	-0.263261	0.518003	0.356686	0.11885	0.490467	0.00821116	-0.492673	0.0971803	0.572681	0.00426468	0.351213	0.135264	0.582931	0.0260045	0.380622	0.0294159	0.20316	0.407033	0.589329	0.00183775	0.518948	0.00121625	0.288251	0.144138	0.391552	0.121622	0.352436	0.10642	0.00663158	0.154568	0.635982	0.0104772	0.605584	0.017661	0.30048	0.272574	0.32423	0.197783	-0.321489	0.171243	0.252621	0.260912
SYNGAP1	synaptic Ras GTPase activating protein 1 homolog (rat)	0.354678	0.0457493	-0.0838874	0.573986	0.441287	0.009001	0.202149	0.543494	0.356686	0.11885	0.490467	0.00821116	0.29634	0.0560808	0.572681	0.00426468	0.351213	0.135264	0.582931	0.0260045	0.380622	0.0294159	0.20316	0.407033	0.589329	0.00183775	0.518948	0.00121625	0.73649	0.0028286	-0.538705	0.118717	0.352436	0.10642	0.682481	0.0350149	0.635982	0.0104772	0.605584	0.017661	0.135789	0.332758	0.380228	0.00918398	0.131393	0.395342	0.252621	0.260912
RPS6KB1	ribosomal protein S6 kinase 70kDa polypeptide 1	0.3079	0.0128294	0.285352	0.00577736	0.561846	0.00139657	0.0411677	0.773378	0.432897	0.129729	0.61589	0.000265582	0.492278	0.00383737	0.78689	0.000573439	0.0354783	0.771021	0.496915	0.0323918	0.25199	0.0343829	0.651007	0.000692976	0.408941	0.120023	0.209753	0.239015	0.278091	0.268341	0.444292	0.00292862	0.528348	0.00940772	0.414112	0.0763398	0.469715	0.00323404	0.209387	0.250522	0.30799	0.00879333	0.206926	0.127925	0.225044	0.0233799	-0.00568939	0.952161
IGF1R	Insulin-like growth factor 1 receptor	0.222535	0.0320152	0.689937	0.0441274	0.398339	0.125601	0.299705	0.120186	0.54607	0.093186	0.438038	0.00361293	0.488936	0.0567611	0.626	0.0477848	0.592458	0.021491	-0.297572	0.394097	0.344767	0.448539	0.648972	0.10139	0.755536	0.015873	0.145193	0.619716	0.308734	0.321209	-0.329927	0.548467	0.744091	0.0637565	0.564277	0.013723	-0.0808853	0.388948	-0.357767	0.0602029	0.215503	0.0519427	0.158058	0.142835	0.227661	0.163697	0.243364	0.157932
PRKCD	protein kinase C delta	0.17276	0.202302	0.428796	0.00740094	0.335691	0.0721935	0.300973	0.105852	0.194875	0.0615835	0.231826	0.0889556	0.407165	0.00102857	0.271933	0.00643026	0.336633	0.0395529	0.346762	0.0578898	0.136917	0.291307	0.174612	0.0107768	0.177458	0.0437085	0.146253	0.368047	0.346248	0.00779623	0.299424	0.141893	0.400776	0.0597675	0.620602	0.00329624	0.262983	0.146889	0.394142	0.00264609	0.340962	0.0686221	0.497966	0.0501511	0.131602	0.411841	0.20163	0.234344
PRKCB1	Protein kinase C beta 1	0.242766	0.0251609	0.334772	0.00661051	0.384315	0.0586514	0.397259	0.137698	0.371476	0.000499733	0.597102	0.00214775	-0.25788	0.00354209	0.70667	0.00140545	0.305023	0.219585	0.561633	4.70856e-05	0.399702	0.00142952	0.296167	0.0152008	0.590525	0.00204906	0.177902	0.0326641	0.458764	0.0120245	0.434727	0.0128706	0.298963	0.0222751	0.498092	0.00279435	0.395351	0.0104566	0.485373	0.00530945	-0.211333	0.00892897	-0.135155	0.0659287	0.322356	0.0753267	-0.0916087	0.129551
NRXN3	neurexin 3	0.408857	0.00540408	0.211904	0.0804287	0.327037	0.0562988	-0.282146	0.0695506	0.160383	0.0866719	0.490861	0.00831721	0.553703	0.0128981	0.187622	0.134559	0.223995	0.0751489	0.373114	0.0215893	0.581811	0.140831	-0.238577	0.199109	0.272712	0.0447815	-0.227915	0.00113394	0.3327	0.242947	-0.196135	0.217848	0.546208	0.0419412	-0.35208	0.0433164	-0.153049	0.086973	-0.217018	0.0971503	0.636347	0.00333085	0.341799	0.0894607	-0.250201	0.0174557	0.400209	0.00800415
MYC	v-myc myelocytomatosis viral oncogene homolog (avian)	0.15665	0.209565	0.189953	0.282481	0.7031	0.00865916	0.676349	0.0124131	0.387139	0.0260299	0.33994	0.00993226	0.266036	0.137173	0.725822	0.0192991	0.679284	0.00211416	0.566204	0.000277173	-0.0518312	0.793396	0.187887	0.389029	0.478333	0.0361009	0.508087	0.00623528	0.836537	0.00681205	0.108683	0.535648	0.0702395	0.746224	0.52582	0.0129332	0.498879	0.0477064	0.928527	0.000908329	0.183289	0.156941	0.0760835	0.576376	0.0227223	0.870663	0.00293509	0.984307
DPYSL5	dihydropyrimidinase-like 5	-0.145456	0.108255	-0.0765404	0.537189	-0.135969	0.349837	0.310437	0.0768893	-0.186661	0.321692	-0.0949753	0.122681	-0.101527	0.337508	0.173156	0.452168	0.219299	0.200704	-0.1159	0.498375	-0.159761	0.372691	-0.0744959	0.575351	-0.137109	0.394992	0.402858	0.0529597	-0.229089	0.0349696	-0.0625986	0.355947	-0.247557	0.0334846	-0.0239857	0.799714	0.14707	0.523667	-0.231613	0.0661017	0.328326	0.147655	0.0757758	0.493297	0.0919129	0.468778	-0.0911384	0.0933098
SLC6A4	solute carrier family 6 (neurotransmitter transporter serotonin) member 4	-0.39215	0.618983	-0.129974	0.727331	0.846956	0.0988885	-0.0131123	0.923639	0.185158	0.697449	-0.948118	0.230086	-0.358311	0.259435	0.402925	0.100908	0.123407	0.778482	0.175821	0.373105	-0.0523133	0.910768	-0.0138101	0.908414	-0.0742364	0.79612	-0.656367	0.0167255	-0.0557434	0.731524	0.2397	0.626476	-0.176578	0.287866	-0.362638	0.246859	0.11484	0.542623	0.149164	0.746127	-0.555968	0.478213	-0.228336	0.368495	-0.444032	0.300976	0.136519	0.706375
KLF5	Kruppel-like factor 5 (intestinal)	-0.394389	0.0511366	0.355822	0.146044	1.18935	0.044611	0.257246	0.29486	0.458882	0.411108	0.470473	0.00331459	0.467171	0.122148	-0.255838	0.01394	0.595511	0.0447954	0.947911	0.0427488	-0.321905	0.00286508	-0.242154	0.000728549	-0.320277	0.000754602	-0.363382	0.000376208	-0.241662	0.00463977	-0.504771	0.00142101	-0.352444	0.000411212	-0.661495	4.73311e-05	-0.323445	0.000363269	-0.225788	0.00115004	0.562594	0.000568315	-0.0916541	0.641742	-0.15639	0.0260369	0.338265	0.15489
SLC1A6	solute carrier family 1 (high affinity aspartate/glutamate transporter) member	-0.130147	0.368939	-0.2026	0.19319	0.158168	0.39246	-0.266647	0.106035	0.0517738	0.696484	-0.190813	0.240111	-0.076791	0.647623	-0.0707827	0.297505	-0.310644	0.0806044	-0.060711	0.646605	-0.371026	0.0936333	-0.0835568	0.62488	-0.0229233	0.843858	-0.168058	0.35664	0.0573763	0.692445	-0.334976	0.146641	-0.322491	0.0896231	0.0116364	0.929073	-0.295165	0.0594004	0.00842769	0.966903	-0.0606657	0.478374	0.125809	0.460352	-0.228951	0.250766	-0.0439974	0.743606
GRB2	growth factor receptor-bound protein 2	0.123733	0.0207917	-0.140706	0.00741333	0.271222	0.00335207	-0.078458	0.0993474	-0.108029	0.0361139	0.264155	0.018336	0.310993	0.0130802	0.282108	0.00147957	-0.303735	0.210227	-0.152719	0.0146938	0.0740834	0.387851	0.116733	0.138554	0.183107	0.0138118	0.115179	0.13624	0.207994	0.056707	0.148406	0.00126872	-0.131236	0.218315	0.308769	0.508454	0.0997628	0.197816	0.174725	0.0857043	0.470919	0.114377	0.221323	0.000142958	0.0717192	0.155266	0.0650853	0.30944
CSNK2A1	casein kinase 2 alpha 1 polypeptide	0.309203	0.0111869	0.377456	0.00392144	0.87606	0.00142355	0.505924	0.064201	0.770392	0.00232872	0.555664	0.00047297	0.640975	0.000462002	0.984999	0.000562416	0.647514	0.00622923	0.929608	0.000383502	0.682632	0.00291783	0.504707	0.00579171	0.822053	0.000579844	0.503421	0.0017714	0.74841	0.0107089	0.627554	0.00206	0.676394	2.33886e-05	0.940665	0.00321893	0.684148	0.000341271	0.629946	0.00765326	0.325973	0.00748115	-0.119379	0.0520746	0.108938	0.158865	0.198576	0.382945
GRIA2	glutamate receptor ionotropic AMPA 2	0.695064	0.000724926	-0.120504	0.074085	0.814117	0.0490993	0.229886	0.207694	0.244775	0.00418207	0.814153	0.00249149	-0.427762	0.0503129	0.141116	0.0177786	0.581637	0.0224534	0.29993	0.0064966	0.143863	0.0355468	0.411604	0.0733562	0.993836	0.000728389	0.280005	0.00225984	0.210081	0.00583578	-0.223077	0.00148239	0.587384	0.084349	0.796684	9.11641e-05	0.231029	0.0178343	0.120877	0.0719109	-0.338357	0.00610855	0.092816	0.104529	0.383389	0.0857196	0.436192	0.202113
AXIN2	axin 2 (conductin axil)	0.105826	0.555603	0.391572	0.122464	0.568329	0.00693029	0.427777	0.015173	0.534155	0.00628483	0.402831	0.0273175	0.560877	0.0324088	0.679082	0.00181074	0.405539	0.00881326	0.572553	0.00010807	0.245696	0.130056	0.266102	0.0114061	0.640807	0.00365765	0.217949	0.330425	0.482881	0.0989813	0.324118	0.0557796	0.524653	0.000123173	0.777662	0.00229281	0.359554	0.0301009	0.681573	0.0261317	0.297005	0.0734258	0.169305	0.513361	0.110753	0.438165	-0.0222373	0.826547
PDE10A	phosphodiesterase 10A	-0.147691	0.419823	0.249498	0.195358	0.486832	0.00566796	0.287645	0.0178998	0.339251	0.124128	0.401663	0.18554	0.349673	0.0326871	0.725019	0.0032182	0.221947	0.0350349	0.421969	0.0176046	0.235502	0.207347	0.410919	0.287086	1.36615	0.00946028	-0.241762	0.0141387	0.407879	0.120634	0.388225	0.109392	0.545148	0.0858135	0.501292	0.0465833	0.553969	0.00772126	-1.04902	0.102965	0.169499	0.199518	0.100175	0.305163	0.238187	0.118388	-0.0656976	0.440682
LZTR2	leucine zipper transcription regulator 2	-0.310458	0.228339	0.391768	0.16718	0.508386	0.368111	0.208885	0.304231	0.581967	0.301185	-0.311432	0.185491	0.413592	0.110474	0.598098	0.33061	-0.253018	0.238615	0.542162	0.107736	0.580159	0.0952737	0.116446	0.322327	0.378945	0.218225	-0.224891	0.137984	0.291186	0.455765	-0.0861784	0.65465	0.120696	0.186872	0.530334	0.103149	-0.107266	0.413167	-0.291872	0.280809	0.491713	0.0492765	0.3649	0.148066	-0.340306	0.228102	-0.215901	0.168964
SLC1A3	solute carrier family 1 (glial high affinity glutamate transporter) member 3	0.451723	0.000289138	-0.150379	1.39985e-05	0.564729	0.000629954	0.615288	4.62155e-05	0.166791	0.0356313	0.469158	0.000167518	0.543647	0.000131824	0.825144	2.66754e-05	0.670716	2.27435e-05	0.701754	0.00024892	0.253196	0.000989728	0.196174	0.00659434	0.178875	0.000256125	0.211526	0.00647482	0.573552	0.0190182	0.204075	0.349378	0.180563	0.00434293	0.327128	0.000549068	0.291076	0.0037011	0.755274	0.00174071	-0.333365	0.0757056	0.0986476	0.126876	0.260415	0.0186227	0.103049	0.0698128
GRIN1	glutamate receptor ionotropic N-methyl D-aspartate 1	0.120899	0.244838	-0.0717642	0.586174	0.173407	0.518511	-0.198622	0.343405	-0.0808774	0.406481	0.118016	0.322082	0.168002	0.166218	-0.189162	0.296843	0.103035	0.508667	-0.0157123	0.858236	0.312057	0.281303	-0.262234	0.052311	-0.224517	0.0477715	-0.0825009	0.112648	-0.501548	0.0361754	0.379018	0.2194	-0.190912	0.107766	-0.39481	0.0050986	0.241086	0.133315	-0.0571023	0.428746	0.190575	0.089179	0.239767	0.085648	-0.1382	0.42233	0.154789	0.0444421
SLC6A3	solute carrier family 6 (neurotransmitter transporter dopamine) member 3	-0.180845	0.391423	-0.211327	0.0978666	0.226864	0.17698	-0.0607925	0.404265	0.231443	0.0398304	0.0988814	0.560711	0.0289147	0.593886	-0.10138	0.111213	-0.0270047	0.586322	-0.115178	0.0954169	0.488266	0.281164	0.194851	0.271153	0.0681552	0.150792	0.126504	0.254005	0.156491	0.405571	0.431343	0.244817	0.222922	0.221003	0.399336	0.274197	0.311744	0.166368	-0.263933	0.183215	0.187121	0.511968	0.0369668	0.129521	-0.328244	0.0101356	0.0337879	0.658279
CDH2	cadherin 2 type 1 N-cadherin (neuronal)	0.405748	1.09643e-05	0.36732	0.000971986	0.503975	0.00171578	0.436413	0.00155616	0.418641	0.00217608	0.591529	8.17799e-06	0.382313	1.65352e-05	0.754299	0.00019217	0.571967	0.000405426	0.414588	0.00228753	0.303739	0.0146479	0.203809	0.00987667	0.621297	0.00290763	0.534632	0.00802219	0.308748	0.00193595	0.56914	9.7308e-05	0.308144	0.000341817	0.623665	8.10393e-05	0.19905	0.0198481	0.390742	0.000713067	0.185781	0.00385353	0.530443	0.187657	0.250324	0.0180668	0.135554	0.192077
PTPN1	protein tyrosine phosphatase non-receptor type 1	0.372435	0.197099	-0.251021	0.299301	0.161018	0.440601	0.327255	0.280872	0.218454	0.321028	0.0457512	0.844419	0.16536	0.554921	0.267869	0.337275	0.189536	0.601646	0.561967	0.00726413	-0.332594	0.203537	0.225908	0.109731	0.854764	5.23504e-05	-0.349535	0.513078	0.151978	0.507323	-0.541732	0.0801166	-0.219069	0.327915	-0.0705089	0.648621	-0.25968	0.153058	0.321622	0.209871	-0.326684	0.305249	0.229296	0.0575636	0.450415	0.0953113	0.165055	0.3443
MAPK9	mitogen-activated protein kinase 9	0.272476	0.0528763	0.0520149	0.619837	0.211524	0.108839	-0.182779	0.167235	0.0519348	0.744817	0.41034	0.0141946	0.0616439	0.708264	0.32315	0.0159334	0.0938897	0.425535	-0.0640915	0.735977	0.110843	0.186568	0.359218	0.101898	0.208442	0.230411	0.0570951	0.698149	-0.132849	0.511319	0.207685	0.277543	0.359934	0.0738221	0.330977	0.0334665	-0.00452458	0.970665	0.0696124	0.762312	0.137863	0.0991764	0.00962899	0.954265	0.111626	0.352462	0.276668	0.0557944
GRIA3	glutamate receptor ionotrophic AMPA 3	0.396573	0.015378	0.623279	0.00190539	1.0665	0.000550835	0.687373	0.00107047	0.857466	0.00159036	0.340764	0.0328277	0.49382	0.00133023	1.15553	0.000137076	0.818179	0.000223966	1.00992	0.000852879	0.574388	0.0307563	0.533363	0.036827	1.12379	0.00018433	0.940901	5.57485e-05	0.858122	0.0082582	0.497497	0.0539902	0.535411	0.0133081	0.868467	0.000353145	0.985885	0.00026599	0.726785	0.00233662	-0.0558093	0.526204	-0.129458	0.240491	0.0890382	0.518494	0.130806	0.0826596
GRM1	glutamate receptor metabotropic 1	0.351305	0.108907	0.206379	0.255674	0.562943	0.0202191	0.398504	0.0757718	-0.0912856	0.438775	0.147622	0.246454	0.195067	0.268251	0.697052	0.0285406	0.326184	0.211181	0.279006	0.310306	0.398721	0.218984	0.359323	0.219658	0.408506	0.176099	0.275082	0.327603	0.198106	0.49383	0.593997	0.143438	-0.190269	0.183075	-0.190449	0.186617	-0.167357	0.103249	-0.181377	0.32376	-0.370716	0.0504656	0.269209	0.13999	-0.407595	0.09906	-0.309267	0.150801
KCNJ2	potassium inwardly-rectifying channel subfamily J member 2	-0.074519	0.195657	0.00521227	0.919627	0.38651	0.0605298	-0.0484863	0.540738	0.197673	0.436631	0.00562902	0.301955	0.0349042	0.756552	0.196698	0.465167	-0.104737	0.0929512	-0.0408547	0.750328	0.402618	0.785517	0.327994	0.425335	0.169431	0.328742	0.0424295	0.248682	0.102549	0.130401	0.50945	0.226015	0.345048	0.339735	0.349601	0.157307	0.263471	0.169709	0.249681	0.201393	0.080148	0.856795	0.0296919	0.741242	-0.189811	0.262452	-0.0562503	0.183538
AKT2	v-akt murine thymoma viral oncogene homolog 2	0.13924	0.436169	0.206317	0.306051	0.314997	0.0800609	0.167866	0.245775	0.227018	0.0370792	0.291233	0.0316973	0.218469	0.115575	0.660329	0.014162	0.23068	0.152686	0.264091	0.00126205	0.621234	0.0143915	0.117405	0.59332	0.109751	0.352057	0.165639	0.223141	0.463498	0.0503448	0.353342	0.217768	0.391156	0.0849826	0.396899	0.0192064	0.28966	0.301378	0.365736	0.0588255	0.221002	0.00266505	0.176369	0.16408	0.345332	0.0749118	0.296923	0.201421
CAMK2D	Calcium/calmodulin-dependent protein kinase (CaM kinase) II delta	0.119786	0.600925	0.0791591	0.355068	0.631964	0.0832797	0.327444	0.0248293	0.0651318	0.309908	0.391842	0.201193	0.427953	0.0361703	-0.201515	0.0095965	0.360561	0.0213765	0.258427	0.351067	0.164418	0.147985	-0.0696364	0.175377	0.385914	0.0026221	0.5144	0.0384241	0.459235	0.00942648	0.407566	0.1978	-0.227947	0.0613819	0.410259	0.116771	0.304559	0.18409	0.36235	0.152237	-0.173643	0.113124	0.31613	0.126009	-0.394375	0.137889	-0.174751	0.113105
AGC1	aggrecan 1 (chondroitin sulfate proteoglycan 1 large aggregating proteoglycan	0.584571	0.0246249	0.190362	0.216467	0.381323	0.137322	0.0587175	0.708858	0.458592	0.0479753	0.692792	3.39276e-05	0.609047	0.0143841	0.672022	0.0325056	0.745423	0.000189514	0.30034	0.246375	0.122724	0.552961	0.218686	0.0786487	-0.408609	0.0765117	0.0819197	0.646744	-0.107135	0.690028	0.267861	0.255132	0.203575	0.0631662	0.360959	0.180643	0.131997	0.362606	0.345231	0.0326586	0.716597	0.000450237	0.590467	0.0589288	0.290699	0.0723322	0.686706	0.000940092
TCF4	transcription factor 4	0.765565	0.0466422	-0.161417	0.026695	0.658598	0.00610171	0.202093	0.171943	-0.16945	0.00811529	1.31172	0.00106187	-0.267777	0.0167634	1.39624	0.0098086	0.771495	0.0329384	-0.150324	0.082209	-0.1933	0.0490668	0.287677	0.00214238	0.836099	0.00277832	-0.287028	0.000269468	-0.138523	0.0294955	-1.03682	0.176175	0.205241	0.0270194	0.338454	0.0064953	-0.247598	3.29187e-06	-0.247304	0.000892067	0.383173	0.00732498	0.495466	0.173394	0.445039	0.187011	0.615289	0.0592492
ADCYAP1	adenylate cyclase activating polypeptide 1 (pituitary)	-0.0930273	0.591092	0.213092	0.271554	0.224798	0.230384	-0.469328	0.0648574	0.164782	0.303826	-0.107311	0.576778	0.130737	0.365554	0.440258	0.0772415	0.115219	0.276489	0.271219	0.117031	-0.260135	0.232251	-0.149045	0.423555	-0.103685	0.136185	0.202188	0.173298	-0.208728	0.0502918	0.0715084	0.390548	0.142274	0.022438	-0.0554273	0.338885	0.0566135	0.416807	-0.0920014	0.324782	0.117237	0.706159	-0.141825	0.17417	0.153228	0.0780441	0.320437	0.0469013
GHR	growth hormone receptor	0.417204	0.0129982	-0.157993	0.407885	0.632214	0.00673255	0.542425	0.0226172	0.466619	0.14582	1.09527	0.00309971	0.636143	0.0219444	0.858855	0.00389342	1.04011	0.00172404	0.343934	0.140507	0.587444	0.0258778	0.513029	0.00621314	-0.195037	0.282584	0.278471	0.217829	0.343168	0.111715	0.8564	0.00537112	0.879676	0.000848517	-0.333953	0.0397316	0.470691	0.0610222	0.440252	0.0426497	0.678064	0.0408176	0.456987	0.132317	0.235486	0.241979	0.49769	0.0434616
TCF12	transcription factor 12 (HTF4 helix-loop-helix transcription factors 4)	0.228074	0.342458	0.144462	0.47218	0.647536	0.020148	0.342241	0.0958913	0.427559	0.117078	0.880735	0.00217561	0.369426	0.181548	0.83035	0.016942	0.440637	0.00740814	0.385759	0.0557463	-0.203689	0.0985701	0.382051	0.0581587	0.186365	0.264784	0.744296	0.0140669	-0.604561	0.00875165	0.0835022	0.74142	0.606976	0.00626575	0.504028	0.0952113	0.57678	0.0404733	0.44684	0.125891	0.713333	0.00792532	-0.342446	0.205331	0.182814	0.441923	0.0983956	0.50728
PAK1	p21/Cdc42/Rac1-activated kinase 1 (STE20 homolog yeast)	-0.239538	0.0972127	0.168236	0.488105	0.0721884	0.571324	-0.11848	0.0890506	-0.102289	0.301374	-0.183578	0.128458	-0.0638105	0.422684	-0.0565549	0.087807	-0.0582222	0.401385	0.241105	0.134145	-0.181871	0.0573576	-0.165332	0.0119576	0.233545	0.249856	-0.113096	0.0615486	-0.145535	0.277695	0.518711	0.133996	-0.173762	0.122757	-0.24459	0.102089	0.119995	0.219462	-0.315514	0.0397925	0.0559597	0.881584	-0.232046	0.219195	-0.150388	0.431516	0.0602574	0.391562
ROCK2	Rho-associated coiled-coil containing protein kinase 2	1.05746	0.00441439	0.725333	0.0270121	0.251445	0.579724	0.586058	0.0299081	0.445607	0.231178	1.37943	0.00134503	1.31772	0.000162607	0.644969	0.00778247	0.770897	0.00417363	0.865228	0.0658665	0.594953	0.0653027	0.626986	0.000886591	0.915132	0.00302986	0.587619	0.0129437	0.932843	0.0710988	0.642573	0.0131941	0.930384	0.000113035	1.01721	0.00144	1.12574	0.00333372	0.595942	0.190487	0.32197	0.247348	0.592386	0.00468104	0.393524	0.281495	0.18484	0.391533
GABBR2	gamma-aminobutyric acid (GABA) B receptor 2	0.22851	0.0568513	0.517628	0.0255809	0.439356	0.0297749	0.44367	0.0112821	0.468765	0.028513	0.561218	0.0020824	0.449565	0.00840133	0.711564	0.0149204	-0.630816	0.00572099	0.58034	0.00434247	0.375562	0.00722899	0.146064	0.188426	0.432141	0.0186502	0.306768	0.0235836	0.578982	0.00249752	0.404396	0.0751275	0.22329	0.233894	0.376051	0.0830303	0.488068	0.0227927	0.554267	0.00927998	0.332707	0.0403643	0.0352281	0.406163	0.272208	0.228125	-0.300434	0.196841
CASK	calcium/calmodulin-dependent serine protein kinase (MAGUK family)	0.556461	0.00285469	0.673011	0.0276166	0.950544	0.00599267	0.709535	0.0265311	0.731838	0.000126638	0.847111	4.12354e-06	0.998283	0.0040087	1.3456	0.000775616	0.909626	0.00229085	1.00157	0.0158147	0.808878	0.000713806	0.837251	0.0810969	1.32409	0.000712807	0.863902	0.00238739	0.843321	0.00986972	1.13283	0.00709078	1.05146	0.000121419	0.884794	0.00598686	1.24053	0.000585966	1.18795	0.000150585	0.29065	0.0683744	0.325273	0.188802	0.395057	0.0117187	0.200092	0.130767
GNG7	guanine nucleotide binding protein (G protein) gamma 7	-0.165681	0.0814251	0.0822	0.25742	0.149998	0.0869039	0.0824891	0.0671739	0.107854	0.477511	-0.086392	0.145481	0.140922	0.177397	0.0701212	0.672877	-0.145584	0.221139	0.305941	0.167936	0.622276	0.184582	-0.31805	0.0897424	0.269098	0.117474	-0.0167659	0.519019	-0.123871	0.188636	0.241537	0.194636	-0.317654	0.0560727	-0.154119	0.393902	0.156913	0.30376	0.00568866	0.26258	0.209424	0.17906	0.0587224	0.647384	-0.0456106	0.0502896	-0.0686554	0.114946
NTRK2	neurotrophic tyrosine kinase receptor type 2	-0.121868	0.212413	-0.230891	0.0447235	0.471755	0.070974	0.236046	0.0403306	-0.0234593	0.552648	0.495205	0.00235084	0.415431	0.00714013	0.416195	0.25358	0.487201	0.0219878	0.290156	0.181021	0.36158	0.0037759	-0.232974	0.0064896	0.553994	0.0108517	0.531501	0.000280627	-0.123048	0.0167693	-0.338782	0.137406	0.131058	0.0165525	-0.210056	0.00866313	-0.278328	0.004732	-0.145602	0.0309727	0.366186	0.00236537	0.290585	0.015101	0.171872	0.228112	0.170537	0.183805
GRIN2A	glutamate receptor ionotropic N-methyl D-aspartate 2A	0.308134	0.0645111	0.584225	0.112756	0.524991	0.019195	0.491515	0.015004	0.621208	0.000278611	0.370728	0.114702	0.565299	0.0186722	0.740897	0.00449005	0.694503	1.94825e-05	0.650544	0.00164868	0.317756	0.217299	-0.14221	0.427773	0.44963	0.0262703	0.285907	0.0339457	0.663992	0.000314982	0.352948	0.119676	0.641773	0.108549	0.504154	0.0370222	0.597092	0.0277628	0.629295	4.6325e-05	0.535098	0.229789	-0.540139	0.0686713	0.215906	0.197146	0.202988	0.176512
MYH9	myosin heavy chain 9 non-muscle	0.22472	0.291723	0.0911976	0.211746	0.236459	0.139136	0.297533	0.0112346	0.20498	0.00500086	0.219798	0.00512627	0.470383	0.0261981	0.30595	0.0656675	0.434233	0.00792467	0.577132	0.0146236	0.123549	0.317696	0.185373	0.569542	0.181178	0.012947	0.0395621	0.488647	0.172335	0.162202	-0.585263	0.271144	0.160893	0.0708627	0.554604	0.0831891	-0.338705	0.357647	0.279963	0.126591	0.137997	0.232011	0.394532	0.033554	0.0694907	0.323568	0.269675	0.10771
NLGN3	neuroligin 3	0.52423	4.27511e-05	0.370519	0.00787442	0.926302	0.00032365	0.79494	2.02885e-05	0.603524	0.000594854	0.87838	0.000111061	0.420059	0.000290398	1.05011	0.000202957	1.16871	2.83956e-05	0.726122	0.000590793	0.295385	0.0815782	0.462327	0.00525718	0.871567	9.09302e-06	0.865495	3.71973e-05	0.8529	0.000491479	0.340257	0.00026071	0.482669	0.00106091	0.924471	0.000117733	0.869392	0.00260359	0.587136	0.00502882	0.285565	0.026854	0.0495397	0.283487	0.263126	0.103324	0.212362	0.0266146
NF1	neurofibromin 1 (neurofibromatosis von Recklinghausen disease Watson disease)	0.41606	0.0205706	0.254847	0.0196684	0.988216	0.0106613	0.670982	0.0040313	0.800094	0.0424415	0.695764	0.0013556	0.538586	0.0306074	0.753186	0.000631844	0.272005	0.00547108	0.294492	0.0365009	0.321909	0.0138031	0.254479	0.0322953	0.824612	0.0224472	0.231789	0.0426214	0.576685	0.00778922	0.68767	0.00393767	0.462661	0.00047284	0.938989	0.00141095	0.938825	0.00168224	0.845367	0.00561766	0.279704	0.00610545	0.525821	0.0496152	0.167367	0.257449	0.17613	0.0376549
NOS1	nitric oxide synthase 1 (neuronal)	-0.108031	0.500042	0.241478	0.319676	0.164844	0.643374	-0.209145	0.246068	0.118685	0.586723	-0.112291	0.451175	0.139596	0.483376	0.0850256	0.87606	-0.332547	0.06448	-0.146129	0.357203	0.367308	0.252785	0.226616	0.725695	-0.0518576	0.461186	-0.0241194	0.875036	-0.204576	0.22817	0.10574	0.757118	0.0887078	0.77591	0.205506	0.866856	0.134911	0.980159	-0.323927	0.00189793	-0.00426035	0.914585	-0.101882	0.41939	-0.0798185	0.723535	-0.123402	0.665134
CHRNA7	cholinergic receptor nicotinic alpha 7	0.299154	0.122587	-0.0302603	0.858728	0.860749	0.074912	0.441343	0.178781	0.543547	0.149381	0.863135	0.00932484	0.46536	0.0634979	1.00969	0.011205	0.176689	0.561128	0.670736	0.0620631	-0.117925	0.617087	0.13822	0.0375218	0.195222	0.0134533	0.0177131	0.841623	0.303183	0.238214	-0.0431444	0.86802	0.154187	0.0120592	0.663288	0.00905704	0.369138	0.16998	0.419229	0.215415	0.56398	0.0334554	0.476587	0.0555902	0.0791938	0.361757	0.130634	0.112602
APBA1	amyloid beta (A4) precursor protein-binding family A member 1 (X11)	0.182239	0.370672	-1.0353	0.0905286	0.233775	0.260607	-0.350354	0.131934	-0.1661	0.507786	0.395837	0.080159	-0.740428	0.145935	0.40175	0.285751	0.54401	0.00378956	-0.43897	0.172686	0.186515	0.438234	-0.247317	0.355822	0.235433	0.622395	-0.272798	0.0358718	-0.110159	0.746375	-0.358977	0.0798249	0.208818	0.41285	-0.473138	0.0264055	-0.368582	0.297653	-1.22838	0.195328	0.493025	0.015061	0.29487	0.563701	-0.168202	0.447079	0.35785	0.0907648
INSR	insulin receptor	0.382225	0.050477	0.454723	0.010245	0.520382	0.000485651	0.431222	0.00260362	0.31428	0.011953	0.417064	0.0167247	0.397172	0.0188793	0.803315	0.000585098	0.740149	0.00452489	0.306087	0.154129	0.377249	0.0518821	0.201585	0.364079	0.458507	0.0061701	0.234702	0.044459	0.192545	0.227166	0.463567	0.115798	0.404302	0.0202567	0.267803	0.106966	0.0866604	0.690136	0.197487	0.392291	0.0348386	0.817879	-0.0575505	0.702057	0.282934	0.041699	0.308927	0.115266
GMEB2	glucocorticoid modulatory element binding protein 2	-0.325451	0.153928	-0.204952	0.664338	0.331033	0.050238	-0.583648	0.0788741	0.565407	0.0770794	0.502171	0.062979	0.0759525	0.615724	0.103622	0.743175	-0.115684	0.132644	0.518375	0.0567065	0.271084	0.484835	0.676138	0.0715587	0.434117	0.0349424	-0.22402	0.196538	-0.0978215	0.485814	0.213167	0.0908141	0.383757	0.216337	0.596658	0.00739417	0.305927	0.50206	0.242807	0.414895	0.442943	0.199975	0.107968	0.416366	-0.308007	0.133157	0.760777	0.00445657
ASAH1	N-acylsphingosine amidohydrolase (acid ceramidase) 1	0.894257	0.000550884	0.435418	0.00125662	1.03878	4.13376e-05	0.675417	0.00493265	0.539869	0.0166223	1.54842	2.60738e-07	0.707238	0.00383159	1.30379	5.72535e-05	0.93298	0.000847258	0.90706	0.000141034	0.645362	0.000263614	0.508683	0.00368802	0.855998	3.35893e-05	0.433949	0.0350032	0.769821	0.00409374	0.787803	7.48003e-05	0.856699	3.74652e-06	0.979577	1.95499e-06	0.862356	0.00400055	0.862151	0.000856598	0.654162	0.00172363	-0.329376	0.0872831	0.265012	0.0222552	0.257563	0.128524
MAPK1	mitogen-activated protein kinase 1	0.247804	0.173387	0.086006	0.529723	0.347381	0.0272227	0.250972	0.112299	0.311592	0.0563208	0.167101	0.441733	-0.045857	0.728045	0.453704	0.0416036	0.246484	0.151096	0.0671541	0.690405	0.415525	0.0231745	0.280752	0.107766	0.1872	0.112151	0.252857	0.0838698	0.325692	0.0274489	0.202758	0.312244	0.180801	0.0829135	0.296093	0.0268402	0.240786	0.133262	0.17658	0.330791	-0.0807022	0.63224	-0.131863	0.238255	0.106323	0.447894	-0.00448847	0.971179
CACNA1D	calcium channel voltage-dependent L type alpha 1D subunit	0.48757	0.00869245	-0.221854	0.0501258	0.148659	0.064413	0.396789	0.14697	0.448795	0.0492474	0.401995	0.0518779	0.165191	0.443303	0.310242	0.199411	0.322701	0.172426	-0.172495	0.250236	0.510249	0.30771	0.284886	0.604017	-0.186851	0.0202263	0.286375	0.140249	0.325023	0.308327	0.104807	0.145604	0.228303	0.172297	0.101897	0.0264973	0.337508	0.153395	-0.27283	0.0247125	0.407176	0.0694586	0.263596	0.105856	0.290714	0.22749	0.170359	0.127955
PRKG2	protein kinase cGMP-dependent type II	-0.222179	0.346264	0.293949	0.236331	0.501029	0.216117	0.638083	0.0629061	0.439694	0.0776679	0.267993	0.282577	0.894166	0.00330446	0.692403	0.0959143	0.587837	0.0645207	0.413092	0.0957531	0.286923	0.136763	-0.109462	0.613815	0.446132	0.0655053	0.0518671	0.847373	0.150783	0.311035	0.249055	0.271789	0.0331316	0.820086	0.116784	0.564954	0.181079	0.439953	0.0295912	0.827848	0.490172	0.0141524	0.600217	0.0281351	0.191374	0.436603	-0.0502453	0.808336
NFYB	nuclear transcription factor Y beta	0.261693	0.00843229	0.0740873	0.403629	0.315963	0.0589876	0.172835	0.0166717	0.202367	0.0418477	0.129239	0.206236	0.194247	0.182138	0.2533	0.136148	0.250889	0.00583526	0.142573	0.265027	0.345173	0.00165328	0.275762	0.00523377	0.321451	0.0426287	0.148276	0.0619583	0.247024	0.01185	0.156242	0.113794	0.439493	0.00665815	0.24037	0.0175521	0.117763	0.185963	0.152851	0.243852	-0.132455	0.0201389	0.12016	0.448869	-0.069438	0.542797	0.0780546	0.286323
EPHA7	EPH receptor A7	0.298384	0.10071	0.212969	0.176436	0.258222	0.00529812	0.440826	0.0243088	0.33033	0.0147683	0.496697	0.00316327	0.607499	0.00723651	0.655092	0.0101621	0.546488	0.071502	0.608451	0.000472378	0.305409	0.204388	0.457449	0.00903392	0.513508	0.00548496	0.700604	4.07169e-05	0.336859	0.0353213	0.392492	0.0610391	0.4823	0.000323829	0.393023	0.0361925	0.807729	2.72803e-05	0.553367	0.00268106	0.350036	0.122328	0.39453	0.0613641	0.39687	0.0519479	0.113597	0.355651
MAPK10	mitogen-activated protein kinase 10	0.10151	0.614011	-0.464929	0.195099	0.61368	0.0127694	-0.294469	0.115025	0.332647	0.246317	0.606411	0.00442825	0.590393	0.055545	0.759094	0.00194727	0.24701	0.171303	0.0729754	0.458768	0.12712	0.654186	0.299526	0.155552	0.257602	0.0785709	0.122957	0.192353	0.241658	0.130352	-0.339396	0.0173114	0.195051	0.285533	0.612977	0.0148513	0.0673875	0.562205	0.334085	0.0639628	0.659031	0.0109772	0.412828	0.1131	-0.387437	0.258342	0.280807	0.0442229
GRIK5	glutamate receptor ionotropic kainate 5	-0.223008	0.166927	0.146052	0.467538	0.508897	0.0443017	-0.397583	0.25996	-0.360251	0.0350203	-0.0302561	0.825898	0.257908	0.160425	-0.292158	0.138073	-0.187367	0.294947	-0.241672	0.431007	-0.214962	0.137495	-0.580375	0.0267244	-0.125013	0.392712	-0.176567	0.187442	0.0250898	0.854271	0.512657	0.0488895	-0.157084	0.536241	-0.297779	0.102633	-0.0899711	0.590382	-0.449108	0.0148835	0.192752	0.300179	0.111856	0.441363	-0.513208	0.0529146	-0.146783	0.451856
SMAD1	SMAD family member 1	0.272503	0.0924486	0.21258	0.0396924	0.552074	0.00232083	0.407439	0.000146212	0.185387	0.0247869	0.538312	0.00091034	0.632886	0.00594946	0.589587	0.00294161	0.430353	0.00328861	0.360719	0.00379394	0.189812	0.137922	0.367086	0.0214633	0.315834	0.000455647	0.285162	0.000620414	0.394101	0.0017935	0.441904	0.0554177	0.187245	0.00749808	0.669979	0.000425464	0.214137	0.0463765	0.356242	0.00562653	0.265809	0.0817536	0.289096	0.00728078	-0.520015	0.0482197	0.506678	0.0141567
BCL2L1	BCL2-like 1	-0.268327	0.0693397	0.210384	0.137883	0.241435	0.242618	-0.362535	0.0486018	0.478603	0.0143207	-0.229682	0.28332	0.293776	0.209734	0.33325	0.0638708	-0.116988	0.442276	0.161803	0.102374	0.647294	0.0697419	0.353748	0.393245	-0.179567	0.41971	-0.717309	0.00391189	-0.246862	0.0659213	-0.329213	0.252064	-0.217405	0.189459	-0.628798	0.0101688	-0.793396	0.000825608	-0.299116	0.0667739	-0.114557	0.217447	0.164937	0.124623	-0.137335	0.367912	0.245547	0.0700097
MAPK13	mitogen-activated protein kinase 13	0.17084	0.13024	0.000317039	0.784694	0.293746	0.181935	0.106994	0.00394341	0.183335	0.201557	0.312941	0.124866	0.000402849	0.62974	0.219281	0.179677	0.110732	0.156704	-0.20619	0.389365	0.481256	0.137582	0.263444	0.237354	0.0419391	0.338445	0.0630862	0.537787	0.0621525	0.176112	0.304363	0.0154521	0.371727	0.199323	0.38571	0.128405	0.147124	0.179072	0.0891354	0.773876	-0.0177486	0.181822	0.223959	0.556203	-0.196814	0.152236	0.00783925	0.921021
KCNJ10	potassium inwardly-rectifying channel subfamily J member 10	0.0464548	0.903583	0.0211786	0.982237	0.387997	0.0622861	-0.0979011	0.438269	0.415103	0.421944	0.110398	0.790644	0.348838	0.27264	0.307852	0.383468	0.336848	0.0108057	0.180877	0.252932	0.620533	0.08623	0.54426	0.123396	0.209509	0.396339	-0.0206989	0.852972	0.271593	0.35926	0.463483	0.226287	0.453437	0.0492614	0.667947	0.0551727	0.473153	0.0211496	0.273419	0.358674	0.0639437	0.902233	0.32766	0.248854	-0.0801449	0.594911	0.434749	0.0113714
CDKN1B	cyclin-dependent kinase inhibitor 1B (p27 Kip1)	0.128633	0.131551	0.236587	0.0393958	0.434062	0.0055555	0.280803	0.125214	0.325007	0.0488208	0.339103	0.00328444	0.222399	0.0759499	0.384984	0.0139931	0.330496	0.0914625	0.359087	0.0155894	0.227875	0.0781659	0.236713	0.00873341	0.564819	0.00147594	0.453525	0.000887664	0.544168	0.055368	0.132949	0.386581	0.289575	0.0066152	0.296775	0.0325573	0.284494	0.0358663	0.363886	0.0955145	0.21047	0.00443171	0.147583	0.242118	-0.0490775	0.514877	0.143816	0.00581877
WIF1	WNT inhibitory factor 1	0.239389	0.164576	0.251385	0.340934	0.405684	0.0163251	0.305873	0.289711	0.18099	0.509266	0.210951	0.215527	0.0888176	0.625552	0.242409	0.147706	0.262157	0.394628	0.260183	0.383021	-0.00575353	0.97743	0.0360997	0.85541	0.0319366	0.88512	-0.197774	0.265317	-0.109312	0.629481	0.0860268	0.670556	0.08388	0.676983	0.039439	0.875565	0.180706	0.2321	-0.411242	0.238753	-0.0284379	0.884741	-0.162567	0.496183	-0.163275	0.271347	-0.043716	0.751008
SCN1A	sodium channel voltage-gated type I alpha	0.049354	0.604989	0.0882359	0.625056	0.388333	0.0881601	0.271293	0.026644	0.255977	0.000705946	0.0803597	0.354948	0.30666	0.0513071	0.417087	0.0124241	0.253517	0.0201717	0.308938	0.00242441	-0.0255495	0.855103	0.0642128	0.684564	0.327225	0.0139684	0.256832	0.120802	0.477982	0.00472029	-0.0947503	0.565912	0.185029	0.262467	0.0870205	0.569	0.180643	0.23763	0.353048	0.0084074	0.0310057	0.691056	0.218424	0.15874	0.028754	0.881784	-0.0177764	0.839729
GRID2	glutamate receptor ionotropic delta 2	-0.115402	0.262105	-0.385971	0.0275545	0.316258	0.197887	-0.215572	0.0396515	0.234383	0.21228	0.0795185	0.572824	0.231445	0.11669	0.252669	0.0253939	-0.138484	0.409269	0.264477	0.21507	0.0704704	0.563851	-0.153734	0.309152	-0.205793	0.162021	-0.0643193	0.656617	-0.231196	0.0162603	0.215185	0.118357	-0.104362	0.308579	-0.457846	0.00850707	-0.0647778	0.679615	0.207978	0.107707	0.19492	0.16356	0.515895	0.0998768	0.150928	0.219553	0.0812556	0.330759
MET	met proto-oncogene (hepatocyte growth factor receptor)	0.348081	0.0558864	-0.153649	0.321485	0.408185	0.114718	-0.0800911	0.409969	-0.126203	0.242563	0.627665	2.37715e-05	-0.0975046	0.519028	0.795993	0.0405345	0.442029	0.0253243	0.165316	0.357749	0.56058	0.000106875	0.642344	0.0025727	0.267645	0.281799	-0.116874	0.0753097	-0.13529	0.290687	0.572934	0.000309709	0.459416	0.00678161	0.577782	0.0391894	-0.123452	0.225555	0.159349	0.565094	0.279584	0.133544	0.0561443	0.634161	0.387808	0.263687	0.127164	0.13524
TGFBR3	transforming growth factor beta receptor III (betaglycan 300kDa)	0.719122	0.00340953	0.544581	0.0433881	0.761458	0.0982948	0.258073	0.399072	0.403391	0.153216	1.16447	0.000370637	0.849671	0.00169247	0.531793	0.0776841	0.527392	0.0601563	0.317271	0.312908	0.668559	0.0155444	-0.066501	0.204722	0.637139	0.00242566	-0.122193	0.207562	0.357846	0.0034547	0.879407	0.0486427	0.578853	0.0582577	0.806664	0.0211936	0.340595	0.101259	0.30421	0.34067	0.445351	0.0257835	0.333114	0.0130169	-0.107134	0.348678	0.269319	0.281679
CHRNA4	cholinergic receptor nicotinic alpha 4	-0.408037	0.0607796	-0.0232329	0.885012	0.200305	0.279856	-0.299783	0.183931	-0.196754	0.302668	0.26975	0.0583827	0.231944	0.0611908	0.0723409	0.637848	-0.299915	0.102009	0.0733692	0.652018	-0.212698	0.259706	-0.290082	0.0265429	0.0695932	0.488586	-0.147289	0.221102	-0.287646	0.0766849	0.121125	0.247532	-0.316337	0.00895749	-0.1596	0.2669	-0.442006	0.0188205	-0.087862	0.66437	0.399036	0.0171047	0.255177	0.0646416	-0.127964	0.409788	-0.29166	0.226473
WNT5A	wingless-type MMTV integration site family member 5A	0.498026	0.00819914	0.473012	0.00245309	0.52228	0.103797	0.483986	0.0880893	0.218953	0.0980362	0.710098	0.00394927	0.563909	0.0031732	0.706492	0.117138	0.376787	0.0850608	0.482495	0.0471536	0.548578	0.0033361	0.462656	0.101753	0.52852	0.00402266	0.279521	0.144134	-0.1059	0.399589	0.391529	0.105391	0.710138	0.00420673	0.54825	0.0889766	0.206407	0.297419	-0.212095	0.0158485	0.212073	0.265284	-0.328456	0.0690673	0.184212	0.557701	-0.107199	0.60041
EP300	E1A binding protein p300	0.21256	0.184114	0.457128	0.0239265	0.169903	0.0116511	0.215206	0.307736	0.472463	0.22551	0.659738	0.00455745	0.779915	0.0452147	0.335284	0.001282	0.623266	0.0714974	0.449846	0.175778	0.208893	0.209704	0.35687	0.0571935	-0.1744	0.0386005	-0.29238	0.0959986	-0.299271	0.182724	0.294542	0.0755531	0.744237	0.140225	-0.123676	0.0512385	0.179874	0.49578	0.33017	0.151701	0.499132	0.0202872	0.322787	0.339121	0.16538	0.0243388	0.214992	0.0962411
RIMS1	regulating synaptic membrane exocytosis 1	0.93711	0.000543475	0.539711	0.0107374	0.688441	0.0331851	0.833862	0.00154669	0.716563	0.00266224	1.18426	0.00051154	0.645514	0.00247537	1.17053	0.00372513	1.08164	0.000554035	0.685133	0.00584418	0.866843	0.00130798	0.887762	1.8165e-05	1.00867	0.00517371	0.613815	0.00122204	0.824493	0.00509988	0.833946	0.00152458	0.758659	3.77936e-05	0.977173	0.000293588	1.01845	1.47916e-06	0.934361	0.00115347	0.247151	0.11284	0.105803	0.483906	0.482083	0.0644647	0.24778	0.144009
ROBO1	roundabout axon guidance receptor homolog 1 (Drosophila)	0.191279	0.366463	-0.270814	0.205038	0.796277	0.149425	0.366622	0.0909426	-0.172936	0.311271	0.582528	0.0219628	0.396608	0.0285966	0.349786	0.0412526	0.280689	0.245301	0.510119	0.0837291	0.169298	0.295165	0.240854	0.186483	0.343826	0.263746	0.252848	0.485946	0.630792	0.0666959	0.253042	0.209051	0.216559	0.34175	0.711408	0.0279436	0.587909	0.0479884	-0.639393	0.18906	0.662494	0.0224319	0.667422	0.00982086	0.534226	0.0341971	-0.27359	0.41559
GRIP1	glutamate receptor interacting protein 1	0.243789	0.0447821	0.493201	0.0124264	0.468596	0.0406171	0.293934	0.0760448	0.356184	0.0125849	0.458162	0.000912461	0.452857	0.00169851	0.826901	0.00150085	0.334463	0.0506758	0.369732	0.0081948	-0.170875	0.227735	0.54783	0.00651286	0.55951	0.00311988	0.152642	0.181006	-0.161005	0.110842	0.281633	0.0109187	0.353837	0.0129058	0.502333	0.00569875	0.24695	0.0925738	-0.247501	0.0516347	0.214373	0.102451	-0.187734	0.191207	0.358305	0.000610952	0.298751	0.244266
SLIT2	slit homolog 2 (Drosophila)	0.22455	0.0614234	-0.0890225	0.654442	0.504649	0.1019	0.195271	0.39395	0.124781	0.0686687	0.493206	0.0252478	0.37843	0.0107805	0.277492	0.0293535	0.428686	0.0542101	0.318313	0.0638693	-0.137602	0.349152	-0.319562	0.00379732	0.264972	0.0460413	-0.214613	0.00969924	-0.29791	0.204447	-0.299635	0.0892207	-0.212714	0.0267363	-0.404159	0.00814427	-0.289651	0.000154915	0.197854	0.142419	0.14626	0.300797	0.315413	0.0712146	0.228121	0.116858	-0.231693	0.197878
GRM5	glutamate receptor metabotropic 5	0.0700293	0.321622	0.137522	0.303294	0.281985	0.114935	0.077742	0.466619	0.510513	0.0078353	0.433531	0.00708	0.297606	0.045585	0.251515	0.00715732	0.299758	0.194245	0.440618	0.0108666	0.170337	0.311302	-0.095627	0.304633	0.278768	0.110073	-0.176466	0.0339045	-0.196349	0.0463792	0.436602	0.0665516	-0.0271254	0.708807	0.155545	0.0624942	0.489941	0.00639236	0.312164	0.0201951	0.406951	0.00706276	0.349587	0.0267606	0.118701	0.0746366	0.280902	0.118797
TSC1	tuberous sclerosis 1	0.277456	0.143204	0.156131	0.59702	0.377827	0.355776	0.155443	0.44495	0.274225	0.46219	0.1076	0.540584	-0.0620469	0.834895	0.285831	0.211362	0.0260294	0.894735	0.375009	0.0134251	0.207056	0.266815	0.291525	0.293854	0.636599	0.00543393	0.0250381	0.859888	0.677337	0.156896	0.410131	0.000866444	0.112776	0.671802	0.35372	0.108717	0.127473	0.616427	0.241091	0.105992	-0.169857	0.377725	-0.218178	0.41692	-0.0919961	0.78556	-0.129414	0.542286
PDE3A	phosphodiesterase 3A cGMP-inhibited	0.0989417	0.723673	0.300553	0.318981	0.495283	0.123568	0.0814023	0.780048	0.716084	0.008955	0.765293	0.0318137	0.43543	0.0563626	0.610643	0.134939	-0.287202	0.383046	0.300148	0.283503	0.274785	0.781201	0.220913	0.896454	0.155169	0.728851	0.0532022	0.816725	0.155409	0.649334	0.131749	0.428747	0.230844	0.93577	0.389831	0.637715	0.296407	0.528776	0.175907	0.588442	0.666351	0.00475271	0.134877	0.531319	0.11536	0.735729	-0.368605	0.219976
TRPC2	transient receptor potential cation channel, subfamily C, member 2, pseudogene	-0.272442	0.203531	-0.186238	0.277614	-0.366427	0.0515713	-0.238668	0.434698	0.442863	0.0975668	-0.0242257	0.303023	-0.0418514	0.832814	0.222092	0.433758	0.100033	0.210414	0.287356	0.0148184	-0.270959	0.137511	-0.0631071	0.629336	-0.238215	0.0282058	-0.371859	0.0087116	-0.055534	0.241403	-0.455665	0.0197388	0.351384	0.323406	0.115199	0.107918	-0.388072	0.0234533	0.196062	0.387189	0.112635	0.647101	0.179543	0.215357	0.219672	0.182123	0.369932	0.0845792
EPHA3	EPH receptor A3	-0.213174	0.1728	-0.217212	0.330386	0.358021	0.170588	-0.151078	0.465987	0.440715	0.177405	0.603862	0.0120525	-0.197504	0.46048	0.533374	0.00758091	-0.166004	0.282664	-0.291305	0.233374	-0.105994	0.46429	-0.203886	0.345236	0.178091	0.656623	-0.213249	0.0311381	-0.257929	0.583412	-0.142945	0.501293	-0.354361	0.108054	0.632744	0.0977837	0.56598	0.0796875	-0.349259	0.308657	0.345243	0.0751568	0.194989	0.407075	-0.134974	0.236993	0.185402	0.400806
GRIA4	glutamate receptor ionotrophic AMPA 4	0.441081	0.0251383	0.332807	0.0874689	0.718023	0.00577353	0.314823	0.114786	0.350634	0.114333	0.431804	0.00033498	0.396773	0.0334836	1.1996	0.000769417	0.484499	0.0453684	0.536413	0.00135808	-0.148486	0.147348	-0.184212	0.0410111	0.785256	0.00325272	-0.181085	0.00231025	0.767315	0.0348591	0.332504	0.0417296	-0.240631	0.00949466	0.697281	0.00305114	0.73069	0.0125514	0.619036	0.0602948	0.294096	0.0168618	-0.089043	0.174502	0.481579	0.0433288	0.32489	0.222938
PLA2G4A	phospholipase A2 group IVA (cytosolic calcium-dependent)	0.0801864	0.653041	-0.150551	0.354259	0.311493	0.0922942	0.352252	0.0769551	0.254661	0.617843	0.207878	0.512972	0.039885	0.913086	0.296278	0.116376	0.378155	0.0148749	0.414869	0.00284136	0.285606	0.445205	-0.168969	0.374821	0.236087	0.0575671	-0.290117	0.00671263	0.166771	0.347506	0.173485	0.384636	0.200558	0.179179	0.228559	0.437286	-0.00488288	0.28078	0.191725	0.244906	0.127692	0.708894	0.190436	0.293321	0.214274	0.261041	0.0895752	0.603664
GRM8	glutamate receptor metabotropic 8	0.313979	0.19466	-0.222859	0.0736041	0.550844	0.0539688	-0.278004	0.00469906	0.315868	0.0370203	0.289841	0.279705	0.27178	0.390107	0.83845	0.00787273	0.297796	0.0637405	0.383577	0.100417	0.547773	0.0670817	0.218136	0.228233	0.240696	0.120125	0.187734	0.304453	-0.3294	0.00931792	0.324311	0.165906	0.180392	0.375343	-0.233069	0.105994	0.253918	0.21759	0.367298	0.00326427	0.46643	0.0427606	0.175159	0.0213678	0.269151	0.120987	0.179379	0.123505
NRXN1	neurexin 1	0.0447229	0.44391	0.058708	0.359907	0.160159	0.0610803	0.27454	0.00533215	0.110293	0.49352	0.0133993	0.822204	0.135845	0.0930918	0.208691	0.00906635	0.240818	0.0198455	0.299045	0.0397433	0.107717	0.277475	0.0604546	0.27325	0.157257	0.19823	0.222306	0.00116309	0.229192	0.103851	0.0369588	0.739739	0.0789462	0.289701	0.198023	0.137426	0.236397	0.0146238	0.159464	0.287058	-0.0313236	0.613841	0.0771371	0.251471	0.0485317	0.556219	-0.0337223	0.616163
KCNJ4	potassium inwardly-rectifying channel subfamily J member 4	0.201699	0.56672	-0.230103	0.267997	0.368865	0.167422	-0.103133	0.434136	-0.323109	0.0341342	0.180489	0.660252	-0.384642	0.0977914	0.27995	0.291717	-0.339343	0.132354	-0.173677	0.513499	0.159676	0.280599	-0.277723	0.152899	-0.177326	0.180853	-0.308996	0.0294395	-0.218269	0.0909091	0.247879	0.109239	-0.481619	0.0156536	-0.481527	0.00375934	-0.167411	0.335204	-0.186923	0.145661	-0.195656	0.354148	-0.247252	0.225245	-0.0889153	0.622145	-0.23621	0.198701
AKT3	v-akt murine thymoma viral oncogene homolog 3 (protein kinase B gamma)	0.165541	0.0138895	0.192638	0.0283094	0.2763	0.0338149	0.411689	0.0108109	0.278009	0.0211421	0.188433	0.04125	0.259144	0.0242767	0.289038	0.00186227	0.39228	0.0193567	0.386757	0.000215381	0.160558	0.17445	0.177595	0.0240615	0.202846	0.0799045	0.0820811	0.422611	0.125184	0.443504	0.269163	0.038639	0.151319	0.0795058	0.0885158	0.302831	0.111309	0.423472	0.121594	0.398068	0.0228923	0.811132	0.0665062	0.50533	0.0127379	0.90444	-0.019409	0.82883
TGFBR1	transforming growth factor beta receptor I (activin A receptor type II-like kin	0.218653	0.0798016	0.509525	0.00829605	0.39106	0.0578009	0.172249	0.442016	0.636776	0.0133895	0.502026	0.0552235	0.540399	0.00347192	0.832761	0.00194814	0.310924	0.16236	0.268013	0.0562885	0.202938	0.0619157	0.0754295	0.557373	0.532992	0.0186516	0.41404	0.0969615	-0.14824	0.236131	0.787438	0.0320717	0.180426	0.0527072	0.554401	0.0521108	0.562186	0.012176	0.36651	0.0968377	0.283373	0.314842	-0.0606805	0.608442	0.441701	0.0682036	0.138675	0.0317421
CREBBP	CREB binding protein (Rubinstein-Taybi syndrome)	0.358275	0.000335526	0.470443	0.0037709	0.486608	0.0020477	0.369332	0.130085	0.416494	0.0358356	0.690677	3.29946e-05	0.824079	0.000102491	0.83704	7.62208e-07	0.275131	0.0618306	0.785104	0.00168869	0.4218	0.00302952	0.47312	0.00301468	0.404269	0.0188046	0.242476	0.0416083	0.69921	0.0046292	0.617625	0.000384934	0.39484	0.00014306	0.421171	0.00137574	0.842293	0.000970509	0.451587	0.00347009	0.332402	0.00946536	0.353636	0.0293476	0.350432	0.00214226	0.132895	0.0716928
STX6	syntaxin 6	0.182395	0.000579888	0.162812	0.140406	0.321855	0.00502993	0.529046	0.00633606	0.224239	0.26513	0.522452	0.00025679	0.341264	0.0266107	0.561022	0.00136493	0.529412	0.0453381	0.463915	0.022417	0.362854	0.180445	0.160568	0.0301246	0.575528	0.000276402	0.45695	0.00661983	0.449658	0.0140583	0.168238	0.107609	0.101361	0.137843	0.351203	0.0437304	0.469832	0.00594497	0.464454	0.0104591	0.458175	0.00852422	-0.0480559	0.205506	0.239167	0.0218136	0.14382	0.0728116
RAP2A	RAP2A member of RAS oncogene family	0.552063	0.00560673	0.109229	0.667664	0.582896	0.157749	-0.521127	0.00609291	0.466076	0.179651	0.342109	0.0872187	-0.170846	0.214033	0.249504	0.371006	0.644318	0.0372487	0.10108	0.226196	0.421411	0.218711	0.551258	0.0155882	0.411814	0.0194461	-0.195519	0.24892	0.37328	0.0925102	0.337189	0.0821883	0.250789	0.256222	0.569363	0.113547	0.140886	0.479253	0.270305	0.43873	0.757477	0.00818034	-0.207939	0.256087	-0.333392	0.263562	0.450332	0.0457918
IDE	insulin-degrading enzyme	-0.182463	0.208101	-0.494192	0.124877	0.296214	0.362089	-0.303136	0.0684526	0.63061	0.00963142	0.379423	0.00341233	0.210886	0.223771	-0.208116	0.142956	-0.422018	0.0261956	0.0968526	0.205285	-0.147692	0.462543	0.216303	0.131598	-0.0571124	0.469921	-0.120543	0.12076	0.160591	0.127278	-0.432589	0.203177	0.31778	0.0324302	0.228635	0.129938	-0.315137	0.0715529	0.351295	0.0944261	0.561886	0.0036843	0.373058	0.141063	-0.121018	0.311613	0.187453	0.208936
EEF2K	eukaryotic elongation factor-2 kinase	0.575895	0.152769	-0.764971	0.0628843	-0.148476	0.152404	-0.260999	0.328606	0.433094	0.170205	0.258304	0.071976	-0.388268	0.137761	-0.153231	0.182685	-0.390709	0.154365	0.35409	0.0940571	-0.488128	0.0123527	-0.194054	0.119254	0.514319	0.0412834	-0.360643	0.00763411	0.421225	0.0609719	-0.61055	0.00263561	-0.35407	0.0109728	0.805953	0.00442649	-0.250496	0.0630954	-0.15441	0.408183	0.315507	0.0261507	0.376703	0.181877	0.215648	0.178928	-0.12971	0.322806
GJA1	gap junction protein alpha 1 43kDa (connexin 43)	1.05834	0.0016754	1.05933	0.000724269	0.916814	0.0386254	0.39502	0.0841067	1.08851	0.000934285	1.49023	0.00103909	0.621188	0.022608	1.04023	0.0419574	0.851116	0.00556034	1.09677	5.23577e-06	1.11269	0.00883271	0.812982	0.00133387	0.135254	0.0252962	0.161734	0.00495274	0.165783	0.0400193	0.0623899	0.0567951	0.874174	2.45833e-05	0.240123	0.0147147	0.770929	0.0484963	0.853848	0.00661553	0.431892	0.0863517	-0.43814	0.0572796	0.170206	0.193958	0.456096	0.0780785
CACNA2D1	calcium channel voltage-dependent alpha 2/delta subunit 1	0.172031	0.128595	-0.535462	0.175741	0.419604	0.00983019	0.234032	0.0286217	0.425616	0.0856212	0.287463	0.0334717	0.256807	0.0348381	0.345299	0.0214004	0.343224	0.0123517	0.110036	0.470467	0.212046	0.139368	0.291769	0.40708	0.685478	0.16452	-0.0658569	0.258075	0.15561	0.383528	0.414144	0.197121	0.340436	0.319473	0.526532	0.00852073	-0.386487	0.402229	-0.717265	0.324635	0.115432	0.11716	0.16238	0.101009	0.145723	0.410265	0.139549	0.105569
TGFBR2	transforming growth factor beta receptor II (70/80kDa)	0.034471	0.975605	0.0523563	0.807556	0.439372	0.168084	0.166114	0.63161	0.059823	0.567551	0.0243917	0.920063	-0.113511	0.691894	0.488744	0.282617	0.374233	0.160321	-0.221412	0.422667	0.309298	0.802527	0.543478	0.0384382	-0.00982983	0.781646	-0.166466	0.186137	-0.27048	0.352513	0.174722	0.957077	0.187071	0.793336	0.284823	0.771022	0.131542	0.796556	-0.33562	0.0439548	-0.0100793	0.913154	-0.165868	0.452884	0.0493722	0.934695	0.20812	0.477535
PTPN11	protein tyrosine phosphatase non-receptor type 11 (Noonan syndrome 1)	-0.266735	0.00364228	0.316868	0.268468	0.600174	0.0216608	-0.0654123	0.352086	0.315739	0.0486788	-0.171284	0.0688672	0.464212	0.0863315	0.27082	0.105681	0.321482	0.0511445	-0.170929	0.230929	-0.182635	0.00347072	0.101051	0.0617068	-0.251747	0.00592087	-0.176807	0.018765	0.480662	0.218952	-0.134004	0.0238349	-0.263131	0.0558091	-0.364879	0.00119155	0.489426	0.0204824	-0.143031	0.383566	0.296508	0.128674	-0.106904	0.201407	-0.186422	0.0403404	0.402988	0.170824
ITPR2	inositol 1 4 5-triphosphate receptor type 2	0.375003	0.0626622	-0.0612847	0.650076	0.285469	0.14148	0.36093	0.0762106	0.435008	0.0783442	0.906473	0.000460494	0.413128	0.0722685	0.527224	0.00861434	0.550737	0.0129653	0.430061	0.0433985	0.368001	0.0458425	-0.0910888	0.466398	-0.262333	0.0097621	-0.396096	0.00785843	0.50074	0.0331433	0.501344	0.114121	0.36559	0.0757672	-0.456081	0.00134479	0.329381	0.11429	0.653017	0.0020591	0.133392	0.241029	0.274455	0.0352905	0.241755	0.152491	0.189807	0.21654
NRAS	neuroblastoma RAS viral (v-ras) oncogene homolog	0.690286	1.8428e-06	0.434991	0.00307241	0.7868	0.000439659	0.579431	0.000105327	0.519224	0.000897123	0.778884	8.8658e-05	0.35433	0.0497223	0.989568	8.88466e-06	0.637204	3.61327e-05	0.671299	0.00213439	0.465974	0.00716027	0.564246	3.12081e-05	0.990014	0.000636863	0.735388	0.000261176	0.512586	0.00581425	0.535913	0.00979013	0.681733	0.000952299	0.797624	0.000417457	0.742214	4.96757e-05	0.626988	0.00389656	0.0885982	0.321625	-0.080661	0.625188	0.202768	0.0283379	0.0577727	0.37723
SCN3A	sodium channel voltage-gated type III alpha	0.160938	0.0841036	0.0751101	0.671178	0.320703	0.182562	0.11642	0.42611	0.197878	0.146978	0.212724	0.0296634	0.155548	0.289366	0.371312	0.112099	0.0872266	0.595291	0.397045	0.00586303	0.106329	0.477363	-8.70542e-05	0.999631	0.0802625	0.658108	0.0387538	0.673946	0.142296	0.293757	0.113537	0.487112	0.0517343	0.70934	0.147164	0.379191	-0.113456	0.258524	0.269933	0.0872411	0.0517865	0.320573	0.080438	0.590923	0.0506093	0.746299	-0.0291931	0.819888
SLC1A2	solute carrier family 1 (glial high affinity glutamate transporter) member 2	-0.471257	0.0337314	0.355399	0.015423	0.480767	0.0111027	0.441476	0.0441365	0.740537	7.3758e-05	0.695129	0.00108714	0.586959	0.0176205	0.884531	0.00158941	0.575146	0.0124345	0.627454	0.00079969	0.834773	0.000886362	0.561317	0.0428378	0.765024	0.00665539	0.578224	0.0145621	0.638844	0.00158929	0.381744	0.00196935	0.582986	0.00185615	0.721865	0.00186375	-0.303992	0.0086117	0.821117	0.00120726	0.572581	0.036245	-0.406385	0.0176136	0.402631	0.0248978	0.187779	0.201928
CREB1	cAMP responsive element binding protein 1	0.220008	0.492885	0.385184	0.0539123	0.638729	0.071728	0.404769	0.0956103	0.233197	0.410951	0.669609	0.0610253	0.672459	0.0243003	0.66852	0.0821704	0.57612	0.00591924	0.467006	0.108186	0.00454096	0.500316	0.106391	0.955449	0.605367	0.016292	0.2276	0.320956	0.607536	0.0203277	-0.0882904	0.350348	0.0264548	0.670923	0.550296	0.122121	0.404239	0.106448	0.170319	0.389968	0.449601	0.201004	0.287275	0.301144	0.029791	0.884921	0.171351	0.371331
CTNNB1	catenin (cadherin-associated protein) beta 1 88kDa	1.46443	2.42366e-05	1.22305	0.000490272	1.21646	4.21095e-05	1.05706	0.000113675	1.11722	1.97079e-06	1.98112	2.43528e-08	1.74236	3.64577e-05	1.96877	6.49201e-06	1.71209	1.05982e-05	1.7396	5.77934e-05	1.45575	2.97133e-05	1.40996	1.99321e-06	1.65354	5.17808e-08	1.42191	2.86459e-06	1.032	2.28243e-05	1.70212	5.25494e-09	1.75438	4.18305e-11	1.83592	4.52032e-06	1.65805	1.72196e-06	1.41289	3.80988e-05	0.516686	0.0050532	0.519313	0.031553	0.752311	0.000437793	0.65503	0.00160381
KCNJ3	potassium inwardly-rectifying channel subfamily J member 3	0.383368	0.0136674	0.419434	0.0207303	0.228343	0.0162949	0.411396	0.0290301	0.241439	0.0855227	0.640396	0.000152549	0.586855	0.0009094	0.436706	0.000139621	0.486027	0.00621795	0.708174	0.000787872	0.448189	0.00132278	0.473248	0.074463	0.600222	0.00071897	0.533111	0.00228004	0.610229	0.0125648	0.213364	0.397678	0.486826	0.0114937	0.533672	0.00110177	0.448123	0.0150271	0.616162	0.00365163	0.554791	0.00247474	0.347263	0.0342177	0.208363	0.0110102	0.127828	0.163281
GRIN2B	glutamate receptor ionotropic N-methyl D-aspartate 2B	0.521759	0.078229	0.366392	0.172365	0.185329	0.379778	0.19826	0.302791	0.235148	0.321881	0.510203	0.265449	0.419752	0.0536588	0.25962	0.52405	0.0622776	0.781674	-0.0365291	0.867054	0.633183	0.026797	0.147549	0.697082	0.186663	0.199139	-0.0693995	0.813869	0.0288851	0.902691	0.43657	0.164159	0.318729	0.155912	0.139489	0.939129	0.328586	0.154539	-0.134241	0.504952	-0.0115558	0.936036	0.05336	0.715513	0.0742912	0.851572	-0.135983	0.354498
CAMK4	calcium/calmodulin-dependent protein kinase IV	0.521609	1.1412e-05	0.816626	6.24701e-05	0.74929	0.00306353	0.925657	3.36042e-05	0.86987	0.00967577	0.986369	1.45223e-06	0.802578	0.00013789	1.25645	3.66452e-05	1.06788	2.88915e-05	0.940916	7.90785e-05	0.622854	0.00375979	0.57725	0.0156667	1.04632	0.00371199	0.408683	0.0633415	0.802246	0.00809635	0.88298	0.000304232	0.702693	0.000933435	1.10467	0.000233101	0.584315	0.0236971	0.946304	0.00132663	0.46476	0.000370614	0.180229	0.0469966	0.507159	0.000378184	0.300608	0.163141
CAST	calpastatin	0.484882	0.00138878	0.34797	0.000619129	0.59148	0.0334267	0.39878	0.00418991	0.418364	0.0015301	0.67423	5.29221e-06	0.452111	0.00220272	0.302138	0.008271	0.65163	3.86425e-05	0.516674	0.00670543	0.197027	0.0455933	0.506261	0.0271892	0.836454	0.00147065	0.467953	0.0167658	0.665521	0.0064679	0.309824	0.0062309	0.336989	0.0128352	0.844885	0.000257615	0.244113	0.0036022	0.596387	0.00061248	-0.318555	0.000456078	0.142589	0.140736	0.236108	0.115763	0.20769	0.0970162
CASP3	caspase 3 apoptosis-related cysteine peptidase	-0.263063	0.00203511	0.255746	0.122132	0.429937	0.0305305	-0.19737	0.0562003	-0.178971	0.152279	0.385146	1.62192e-05	-0.408231	0.0124268	-0.26231	0.0200334	-0.306666	0.0123436	0.36473	0.071293	-0.10255	0.493485	0.424273	0.0079633	0.528595	0.00577487	0.458922	0.00122382	-0.208077	0.0292104	-0.314911	0.0204669	-0.378561	0.00504128	-0.273586	0.0369313	-0.295503	0.0226616	-0.167591	0.100861	0.36753	0.00098156	-0.301975	0.0392676	-0.25192	0.0658767	-0.109295	0.395818
IRS1	insulin receptor substrate 1	0.257335	0.102545	0.248778	0.132041	0.835672	0.00340152	0.0741362	0.667125	0.295506	0.0834258	0.527854	0.0263022	0.13269	0.243598	0.922632	0.00115118	0.256181	0.183694	0.343186	0.0564848	0.169191	0.255731	-0.0455133	0.761564	0.3195	0.0338625	-0.0949443	0.548681	0.0950424	0.7533	0.137254	0.535733	0.195465	0.297251	0.360603	0.0962549	-0.0851599	0.65056	0.0813187	0.698173	0.270519	0.133314	-0.116088	0.434357	0.0869604	0.603966	0.182045	0.2622
SHANK2	SH3 and multiple ankyrin repeat domains 2	0.294937	0.386462	-0.17753	0.0649923	0.828262	0.0358353	0.799554	0.0511598	-0.0286472	0.792282	0.931692	0.0134409	-0.222705	0.00679617	0.704844	0.0113382	0.99082	0.0119413	0.527472	0.163413	0.652993	0.12653	0.66622	0.036356	0.515191	0.124707	0.425852	0.17465	0.545997	0.254509	0.758234	0.0143187	0.559125	0.169568	-0.109718	0.287252	0.55749	0.0529547	-0.114957	0.181236	0.636755	0.0308473	-0.0451751	0.50086	-0.202945	0.0621708	-0.11372	0.120034
GLRA2	glycine receptor alpha 2	0.276467	0.00761931	0.371877	0.0942121	0.538675	0.00258417	0.0418305	0.802621	0.23631	0.200766	0.446912	0.0183227	0.249312	0.135793	0.544829	0.00192884	-0.12505	0.302746	-0.156354	0.220208	0.525572	0.0108831	-0.141189	0.0874051	0.582473	0.00407726	0.356787	0.149823	0.262249	0.197383	0.457196	0.0593951	0.281339	0.139291	0.565164	0.0153297	0.324137	0.0566481	-0.201755	0.196071	-0.168824	0.0416931	-0.183216	0.124077	-0.0622165	0.503646	-0.105119	0.229038
RASGRF2	Ras protein-specific guanine nucleotide-releasing factor 2	0.269392	0.138258	0.161489	0.290258	0.228156	0.405419	-0.058889	0.773971	0.118789	0.570076	0.0344547	0.855729	0.531268	0.0192871	-0.067165	0.741264	0.262014	0.166292	0.0613113	0.780407	0.00562156	0.995919	-0.276493	0.247076	0.073846	0.773928	-0.0848994	0.654427	0.296634	0.0957523	0.190811	0.294895	-0.114104	0.463553	-0.0914415	0.606679	0.0338813	0.841632	0.0300403	0.851491	-0.234937	0.229823	0.369779	0.101603	-0.295321	0.221524	0.320903	0.0843482
GRM7	glutamate receptor metabotropic 7	0.59236	0.000490652	0.240415	0.120859	0.595415	0.00153323	0.262203	0.120516	0.430524	0.00261193	0.985861	0.0002563	0.305091	0.0670829	0.954135	0.00017395	0.586585	0.000124433	0.732619	0.00111409	0.471127	0.00295634	0.375432	0.0223147	0.731353	0.000307514	0.596886	0.00135219	0.537456	0.00265439	0.502427	0.000155242	0.543228	0.000175946	0.664278	0.00121572	0.651558	0.000798033	0.589557	0.000216879	0.393501	0.0197753	0.0646764	0.689112	0.358719	0.0129609	0.324382	0.0228875
CSNK1E	casein kinase 1 epsilon	0.68085	0.00239737	0.737696	0.00191737	0.966361	0.00150636	0.678388	0.0195649	0.963201	0.000408385	0.878727	0.000703105	0.85641	0.0014998	1.26406	0.000168123	0.765105	0.0251974	1.0977	0.00617344	0.649217	0.00180686	0.785297	7.40917e-06	0.949602	0.00163727	1.09242	0.000100595	0.884217	0.00428384	0.80662	0.00033491	0.723141	0.00425158	1.20353	4.17108e-06	0.699663	0.000837038	0.79595	0.00401043	0.197877	0.262247	0.233617	0.399459	0.297702	0.0730715	0.32818	0.060191
SEMA3A	sema domain immunoglobulin domain (Ig) short basic domain secreted (semaphor	0.00421092	0.988714	0.439142	0.0378582	0.578268	0.0545103	0.276026	0.282276	1.2124	0.00157127	0.0891931	0.820453	0.381949	0.0852639	-0.00780663	0.952237	0.251868	0.435957	0.801473	0.014092	0.338019	0.245491	0.335547	0.0211119	0.72345	0.00163516	0.661757	0.00677983	0.704917	0.0343065	0.519282	0.0861157	0.494301	0.000358015	0.595526	0.0018334	0.76965	0.0752197	0.68359	0.0210236	0.0849822	0.560019	-0.0571928	0.807691	-0.586075	0.0243434	-0.0241587	0.904
CHRNA1	cholinergic receptor nicotinic alpha 1 (muscle)	0.185075	0.332874	0.471604	0.042566	0.921976	0.00206459	-0.341011	0.0505105	0.0377342	0.508083	0.139346	0.79836	0.205296	0.211694	0.63584	0.0581476	-0.044951	0.795432	-0.0783889	0.755611	0.31517	0.463502	0.351907	0.466887	0.583942	0.0211697	0.165384	0.40923	-0.210003	0.415525	0.257595	0.638011	0.477903	0.0164415	0.628066	0.197119	0.424354	0.234463	-0.209289	0.23457	-0.0457291	0.698739	-0.266308	0.219728	-0.286136	0.274478	0.29606	0.242337
GNB3	guanine nucleotide binding protein (G protein) beta polypeptide 3	0.09105	0.742382	-0.488453	0.137846	0.815364	0.0289988	-0.0289843	0.898949	-0.0217394	0.140155	0.363818	0.268365	-0.808608	0.0677524	0.252133	0.401103	0.477681	0.0036603	-0.100347	0.750218	0.530891	0.243744	-0.293748	0.564992	0.0790805	0.831401	0.308472	0.204469	0.297813	0.282427	0.428003	0.0552458	-0.521352	0.287497	-0.127575	0.214361	0.297396	0.394675	-0.202557	0.349727	0.272768	0.280372	0.502142	0.272398	-0.656582	0.0721762	0.57453	0.022903
GABRA4	gamma-aminobutyric acid (GABA) A receptor alpha 4	0.446817	0.0787473	0.568458	0.00198724	0.829115	0.00201391	0.662468	0.00278463	0.624617	0.0235757	0.52564	0.0650793	0.565832	0.00403273	0.790289	0.00140184	0.947577	2.79268e-05	0.686424	0.0187365	0.48809	0.0879929	0.432685	0.08448	0.874804	0.000352948	0.622737	0.00222309	0.807576	0.00210654	0.555119	0.00825036	0.566303	0.0409414	0.800498	0.00578889	0.842436	0.00663864	0.704513	0.00298775	0.0788223	0.657947	-0.00262534	0.986614	-0.038826	0.80196	0.28511	0.0180461
CAMK2G	calcium/calmodulin-dependent protein kinase (CaM kinase) II gamma	0.248043	0.101889	0.364722	0.0784041	0.511935	0.0725509	0.401692	0.238154	0.251806	0.188695	0.329472	0.040781	0.285712	0.0253417	0.285759	0.065353	0.415544	0.011915	0.44265	0.0484805	0.648411	0.165457	0.231331	0.0399204	0.565465	0.0218461	0.154419	0.11763	0.307368	0.0519569	0.80111	0.00377702	0.248206	0.0203597	0.950952	0.0363335	0.314427	0.0253525	0.224294	0.204729	0.611132	0.0950615	-0.532563	0.0151345	0.134886	0.30152	0.304811	0.0465418
RGD1307234		0.741964	0.00634028	0.468387	0.072882	0.56078	0.0503999	0.903726	0.0119948	0.871888	0.0181158	0.960692	0.0140784	0.708826	0.00213898	1.07427	0.00676318	1.28087	0.000861847	1.00103	0.0216418	-0.36057	0.0166871	0.508553	0.0246873	0.647963	0.00122229	0.686684	0.030549	0.460579	0.00875982	0.96808	8.72707e-06	0.916605	0.00439229	1.09433	0.000855928	0.877077	0.000108428	0.465279	0.147699	-0.402423	0.0295215	0.240439	0.178848	0.513489	0.115434	0.377143	0.177986
PDPK1	3-phosphoinositide dependent protein kinase-1	0.14395	0.0134715	0.149977	0.176352	0.254218	0.0212202	0.0879881	0.453661	0.128135	0.22554	0.235435	0.00477038	0.156114	0.102282	0.431049	0.00363219	0.180676	0.126978	0.182495	0.0639025	0.193887	0.140244	0.0240021	0.878224	0.182479	0.0938245	0.0856314	0.387766	0.178366	0.0893884	0.238268	0.0637496	0.016862	0.877267	0.130933	0.196795	0.146881	0.403567	0.175698	0.218269	0.0914851	0.176156	0.00613661	0.93306	0.176831	0.0346901	0.092688	0.319135
VEGFA	vascular endothelial growth factor A	0.281175	0.0764804	0.0688436	0.762702	0.642421	0.0435278	0.313767	0.0466263	0.160105	0.598313	0.236301	0.254574	0.290171	0.187709	0.493053	0.135313	0.522873	0.166286	-0.0357768	0.917953	0.492049	0.0644552	0.601573	0.00626586	0.317233	0.478934	0.0871954	0.70216	0.732768	0.116101	-0.00221615	0.89635	0.567395	0.0461543	0.64607	0.0833133	0.647113	0.0305065	0.640636	0.00241912	-0.0448741	0.847957	0.221327	0.168627	-0.149368	0.569962	0.209107	0.499725
GNAQ	Guanine nucleotide binding protein (G protein) q polypeptide	0.531915	0.0005963	0.174365	0.0129945	0.272714	0.045002	0.222866	0.0254456	0.120366	0.0241745	0.801695	0.000110636	0.320978	0.0134862	0.641707	0.000888046	0.312361	0.00985	0.272701	0.00178779	0.56448	0.00918287	0.207261	0.000221328	0.206912	0.00453379	0.0533666	0.157296	-0.374895	0.114923	-0.309437	0.00387381	0.58126	0.00025239	0.656122	0.00028607	0.128093	0.0714241	0.0523792	0.487611	-0.182421	0.0516759	-0.316863	0.0305704	0.368993	0.0121868	0.280234	0.0986874
LIN7A	lin-7 homolog A (C. elegans)	0.0456984	0.820083	0.405902	0.00624322	0.322059	0.194132	0.117719	0.43025	0.427359	0.190561	0.151579	0.544813	0.465804	0.00118263	0.480731	0.113614	0.268396	0.136635	0.309305	0.117739	-0.0403745	0.804837	-0.0566661	0.688219	0.204084	0.331268	0.44209	0.0823449	0.369908	0.0594632	0.0467922	0.752646	0.129891	0.606321	-0.208847	0.0695751	0.399301	0.20725	0.260991	0.224098	0.10588	0.553618	0.0599019	0.535295	0.158672	0.593943	0.150676	0.211984
PIK3R1	phosphoinositide-3-kinase regulatory subunit 1 (p85 alpha)	-0.125314	0.369853	-0.361639	0.31493	0.86718	0.104712	0.943997	0.0515394	1.12634	0.00754604	0.628876	0.000306551	-0.600478	0.0379639	1.53278	0.00689902	0.601754	0.0357856	0.815746	0.154099	0.33495	0.0255592	0.0963042	0.367847	1.20592	0.025937	1.02154	0.0218856	1.20622	0.0209672	0.169403	0.255561	0.254083	0.0289503	1.37918	9.74239e-06	0.672516	0.0279562	1.13615	0.0648455	0.75419	0.00343031	-0.157323	0.360857	0.271993	0.00588742	-0.342243	0.367652
APC	adenomatosis polyposis coli	0.272364	0.00108603	0.244871	0.0300312	0.362597	0.0041591	0.197161	0.0832187	0.174418	0.0755066	0.432957	0.000641913	0.372432	0.00610847	0.603187	4.27282e-05	0.377896	0.00510113	0.368106	0.031061	0.0684908	0.55506	0.0727863	0.420477	0.273303	0.00964325	0.332945	0.00365764	0.346956	0.0995896	0.241815	0.061128	0.196345	0.00736495	0.23899	0.0106223	0.386551	0.00309619	0.344147	0.045379	0.160592	0.0882092	0.12756	0.173836	0.24059	0.0120586	0.180735	0.025692
LEF1	lymphoid enhancer-binding factor 1	0.556198	0.00173382	0.500622	0.136194	0.208687	0.0379878	0.139917	0.0998431	0.0467877	0.523269	0.686712	0.0159116	0.841444	0.0167937	0.227717	0.0343563	0.234035	0.106403	0.350854	0.00891921	-0.125421	0.304475	0.0654182	0.294755	0.172246	0.00999867	0.107614	0.176347	0.167247	0.159155	0.0717856	0.10007	0.146329	0.0138553	0.871932	0.00874831	0.447857	0.190097	0.163864	0.167063	0.46051	0.0201884	0.340821	0.153596	0.610968	0.0639534	0.650023	0.00026298
PTK2	PTK2 protein tyrosine kinase 2	-0.245799	0.268796	-0.138551	0.3359	0.305706	0.299712	-0.163596	0.168146	0.150115	0.617086	-0.199363	0.314898	-0.381282	0.127368	0.099502	0.00705894	-0.344311	0.0399973	-0.14365	0.460309	-0.152383	0.354251	-0.0740527	0.366316	-0.122206	0.348904	-0.0452178	0.547909	-0.167256	0.567996	0.181515	0.186114	0.0972357	0.0867974	-0.117868	0.423397	-0.0273917	0.860098	-0.122928	0.545584	0.0587082	0.702167	-0.305665	0.138333	0.171097	0.184909	-0.180715	0.130632
CALM2	calmodulin 2 (phosphorylase kinase delta)	0.209704	0.0874699	0.0499035	0.515062	0.215414	0.118662	0.0740837	0.586408	0.0545524	0.653247	0.138368	0.252532	0.0155339	0.887999	0.362366	0.00364534	0.203653	0.185498	0.135677	0.25423	0.345259	0.00227022	0.242491	0.0110486	0.149394	0.114734	0.303706	0.00565747	0.18378	0.118062	0.112136	0.147379	0.165476	0.0201864	0.438144	0.000745085	0.312647	0.0677757	0.211626	0.0738609	-0.0713366	0.420843	-0.0343696	0.758083	0.146952	0.181528	0.12957	0.180149
RPS6KA1	ribosomal protein S6 kinase 90kDa polypeptide 1	0.353197	0.044018	0.138523	0.562403	0.447658	0.0386663	-0.067438	0.765441	0.691427	0.0601707	0.660363	0.0358495	0.139044	0.554611	0.370384	0.223785	0.370308	0.000663872	0.683427	0.0773986	-0.347489	0.311802	-0.00607209	0.934919	0.483354	0.0701713	0.0474944	0.888652	0.142543	0.61639	-0.513629	0.177534	-0.151634	0.519616	-0.147386	0.441439	0.295808	0.493558	0.901423	0.000736848	0.307167	0.297866	0.000521107	0.997478	-0.077274	0.724263	0.437746	0.0559389
GSK3B	glycogen synthase kinase 3 beta	0.303943	0.00163667	0.168421	0.161845	0.77823	0.000521028	0.271654	0.273361	0.472389	0.0616079	0.544169	0.000783117	0.398953	0.000919898	0.873052	0.000244407	0.402831	0.115472	0.635943	0.00588813	0.226339	0.00271584	0.273511	0.0186092	0.681679	0.000485149	0.370397	0.0211008	0.496179	0.0335428	0.268405	0.00126786	0.349093	0.00299518	0.621874	0.000180291	0.394078	0.00375847	0.569624	0.013637	0.240226	0.037955	0.230532	0.00122603	0.094822	0.297949	0.131177	0.150533
IGF1	insulin-like growth factor 1 (somatomedin C)	0.182688	0.0733258	0.19719	0.154319	0.180274	0.0652441	-0.14626	0.180433	-0.0937821	0.326644	0.303867	0.00740799	0.248155	0.0496186	0.248509	0.112003	0.360217	0.15146	0.0799387	0.286021	-0.118899	0.346495	-0.0993921	0.311362	0.445099	0.00420988	0.27159	0.00535121	-0.380532	0.0291939	-0.268276	0.0989788	-0.0569005	0.567931	0.217521	0.0488661	0.361118	0.0100938	0.111903	0.397407	0.121179	0.291413	-0.127256	0.360202	-0.0501481	0.54412	0.222055	0.275688
SLC1A1	solute carrier family 1 (neuronal/epithelial high affinity glutamate transporter	-0.207338	0.0980573	-0.730646	0.0621609	0.314088	0.117103	-0.281922	0.115506	-0.0894913	0.163042	-0.150981	0.0296652	-0.159317	0.00434435	-0.161497	0.0549485	-0.279614	0.21418	-0.225061	0.00633999	-0.318977	0.138841	-0.771373	0.0195494	-0.0788354	0.183495	-0.243533	0.0232884	-0.167442	0.17297	-0.274473	0.0126548	-0.497233	0.0136309	-0.208198	0.0157231	-0.167253	0.0240578	-0.277502	0.0541507	0.184462	0.0208269	0.561506	0.0685062	-0.0458107	0.466704	0.136965	0.342474
GRIP2	glutamate receptor interacting protein 2	-0.300652	0.197262	-0.33003	0.0864267	-0.138026	0.457953	0.0621737	0.748308	-0.164196	0.381604	-0.159839	0.508657	-0.303546	0.104155	-0.0351501	0.835154	0.218607	0.268734	0.087981	0.628325	0.49562	0.0956164	-0.196865	0.392104	-0.196528	0.0580835	-0.0504025	0.760348	0.08982	0.366976	0.367436	0.166169	-0.216154	0.316555	0.167953	0.34977	-0.315979	0.0931135	-0.13374	0.224673	0.171393	0.513376	-0.240835	0.347425	0.102875	0.35798	0.156434	0.396841
KCNC2	Potassium voltage-gated channel Shaw-related subfamily member 2	0.221259	0.0329976	0.420473	0.0585619	0.768895	0.00251291	0.797551	0.0311602	1.04459	0.000111987	0.62433	0.0159716	0.603844	0.0358472	0.927917	0.0103523	1.21862	0.00112724	0.750062	0.000660923	0.760799	0.0231658	0.332965	0.254877	0.505764	0.00169353	0.344918	0.000980143	0.640057	0.000246011	0.740189	0.0158355	0.294359	0.0324152	0.865351	0.0194394	0.591767	0.003596	0.54241	0.00122452	-0.292846	0.0244042	-0.402572	0.097275	0.409134	0.248676	0.421073	0.0892191
CACNA1B	calcium channel voltage-dependent L type alpha 1B subunit	-0.238202	0.294577	-0.0624206	0.565562	0.218947	0.130048	0.204674	0.103372	-0.0581832	0.463304	0.183513	0.139615	0.193819	0.0443319	0.148116	0.109437	0.130282	0.330458	0.0908437	0.238319	0.105906	0.543134	-0.126158	0.536637	0.193816	0.0060142	0.202242	0.000675521	0.314859	0.0851472	0.12884	0.49761	-0.366177	0.0803906	0.0923371	0.228525	0.236126	0.0815852	0.205939	0.101115	0.375458	0.0167015	0.25624	0.00537412	0.0690888	0.57389	0.169638	0.417411
CACNA1C	calcium channel voltage-dependent L type alpha 1C subunit	0.706377	0.0159826	-0.589316	0.191182	0.491403	0.0229863	0.281958	0.210666	0.369508	0.324756	0.939129	0.00732678	0.181475	0.227585	0.402639	0.10341	0.260601	0.243256	0.248203	0.0503759	0.168121	0.138776	0.303626	0.512135	0.192863	0.356818	0.147437	0.175929	-0.595666	0.064015	0.399822	0.0993453	0.382605	0.228793	0.338722	0.13715	0.317327	0.284236	0.253317	0.0201526	0.59546	0.00554805	0.334831	0.21795	0.178144	0.381149	0.340698	0.149733
GRM6	glutamate receptor metabotropic 6	-0.22157	0.0373305	-0.115232	0.406832	0.294381	0.0957625	-0.32575	0.0283408	-0.0601853	0.67329	0.519425	0.159931	0.298118	0.162082	0.258106	0.150529	-0.272579	0.0250265	-0.557264	0.00319956	-0.293932	0.0357056	0.39829	0.150592	-0.0423395	0.264616	-0.0715416	0.264634	0.213578	0.1157	-0.4493	0.0151077	0.569857	0.0800991	0.441746	0.190958	-0.382776	0.029466	0.20343	0.186692	0.740995	0.0428243	0.41335	0.0755557	-0.167366	0.233619	0.209361	0.144762
CACNA1G	calcium channel voltage-dependent alpha 1G subunit	0.0781727	0.757845	-0.375133	0.176731	0.175245	0.466453	-0.132692	0.567187	0.204869	0.290534	0.061921	0.872028	-0.376961	0.110921	0.148491	0.608374	-0.302786	0.283668	0.0522208	0.787203	0.0208345	0.940742	-0.561931	0.17032	-0.423247	0.0355708	-0.212735	0.212434	-0.0972274	0.782447	-0.471285	0.094132	-0.353433	0.185278	-0.459728	0.0219511	-0.414687	0.076221	-0.269566	0.368662	-0.0162517	0.958248	-0.00182817	0.997092	-0.0267533	0.876818	-0.170094	0.574572
STXBP1	syntaxin binding protein 1	0.197914	0.0348742	0.268952	0.00879461	0.484435	0.000610832	0.415314	0.00128071	0.101273	0.216581	0.367361	0.0070048	0.461015	0.0175562	0.552046	0.000200401	0.336025	0.0434451	0.3656	0.0260961	0.194646	0.0263641	0.114377	0.0583369	0.402493	0.00116471	0.396047	0.000249186	0.541189	0.0261971	0.34862	0.00453855	0.15124	0.0235717	0.347743	0.00347291	0.212146	0.0358576	0.466643	0.0526038	0.230282	0.0466982	0.179934	0.285604	0.0848378	0.229333	0.0320259	0.497013
ACVR1C	activin A receptor, type IC	-0.0775857	0.724414	-0.0991883	0.591866	0.251713	0.463548	-0.274024	0.272347	0.235563	0.481289	0.145531	0.63566	0.0499439	0.795067	0.429301	0.225017	0.141721	0.514256	0.150663	0.371663	0.363355	0.207046	0.452685	0.0266439	0.434508	0.125118	0.0869967	0.593386	0.378226	0.0234826	0.583526	0.0948866	0.343761	0.355917	0.481438	0.177506	0.511761	0.00475018	0.28901	0.218569	0.223117	0.182893	0.149132	0.510986	0.177587	0.663291	0.415745	0.0997425
NRP1	neuropilin 1	0.624027	0.0111366	0.241132	0.237139	0.434328	0.000795146	0.300308	0.14899	0.266471	0.00692006	0.782772	0.00555819	0.806935	0.000491513	0.852415	0.000298673	0.484983	0.0328409	0.744885	0.00060097	-0.282182	0.345621	0.0623756	0.244833	0.219216	0.00732816	0.234009	0.000817878	0.270892	0.0497492	-0.196249	0.685277	0.166361	0.036083	0.17662	0.0141903	0.186649	0.0108182	0.306168	0.0299512	-0.275336	0.0260262	0.565803	0.00100738	0.418087	0.00807207	0.184676	0.0371402
CACNA1E	calcium channel voltage-dependent alpha 1E subunit	0.0996726	0.810008	-0.421493	0.136953	0.277758	0.44042	0.0387971	0.871892	0.632234	0.111571	0.181345	0.627515	-0.221529	0.40412	0.164234	0.828462	0.461059	0.153881	0.288062	0.0772889	0.226455	0.981406	0.294164	0.640806	0.342812	0.18172	0.160817	0.306661	0.297828	0.156412	-0.0937966	0.439497	0.43254	0.326459	0.628172	0.0727122	0.326267	0.256236	0.231551	0.336863	0.0816723	0.831963	0.199964	0.440049	-0.113525	0.668447	0.422262	0.146891
KCNIP4	Kv channel interacting protein 4	-0.146065	0.179325	0.576584	0.0101462	0.743544	0.00494042	0.172253	0.421144	0.594987	0.00717149	0.543104	0.0192798	-0.295912	0.000142768	0.801341	0.00349297	0.298803	0.173661	0.584628	0.00242259	0.569949	0.000319422	-0.293905	0.000886545	0.711127	0.00410668	0.7493	0.000997704	0.50946	0.0177861	0.417314	0.057643	-0.245785	0.00827808	0.498661	0.00490457	0.64254	0.00201233	0.51835	0.00896873	0.378966	0.0400335	-0.0673621	0.412834	0.0577962	0.708161	0.126549	0.281135
GRIN3A	glutamate receptor ionotropic N-methyl-D-aspartate 3A	0.432953	0.0137736	0.393354	0.0993838	1.07213	0.000189471	0.641943	0.0141451	0.693366	0.00729867	0.553284	0.0898532	0.797783	0.0160896	1.4065	0.00231255	0.648962	0.00387921	0.96269	0.00305379	0.612564	0.0020527	0.78334	0.00058769	1.07665	0.0170712	0.82366	0.000756479	0.549601	0.0118491	0.675519	0.00158705	0.882575	0.000775615	0.982236	0.0029067	1.02866	0.000386741	0.698321	0.00011384	0.120331	0.656993	0.404429	0.16994	0.334372	0.151078	0.00701877	0.959325
CDH6	cadherin 6 type 2 K-cadherin (fetal kidney)	-0.0200132	0.932917	0.190341	0.521591	0.401643	0.117227	0.152667	0.112437	0.322053	0.0461048	0.0793296	0.734944	0.101528	0.717945	0.481728	0.0451744	0.37472	0.0017213	0.291539	0.0261753	0.371162	0.0738873	0.384188	0.0034618	0.28982	0.024653	0.139032	0.119252	0.110004	0.504343	0.51643	0.0476249	0.250983	0.0248174	0.381732	0.0137305	0.481295	0.000190907	0.289843	0.0387479	0.0993427	0.564782	-0.088813	0.643386	0.0800859	0.724396	0.222053	0.0304066
MAOA	monoamine oxidase A	0.44973	0.00017304	0.427757	0.000416481	0.41724	0.000611527	0.581437	0.000249672	0.405724	0.00291596	0.517772	9.32755e-05	0.503513	0.000319254	0.7222	0.000165186	0.589207	0.000520259	0.323197	0.00057496	0.425315	0.00428524	0.316913	0.0141416	0.590009	0.000107081	0.444763	0.0026285	0.549473	0.0137618	0.727939	0.0001477	0.508135	0.00042604	0.553501	0.00241508	0.59849	0.00328077	0.617407	0.00457946	0.275981	0.00201022	-0.196267	0.0170366	0.225309	0.0151526	0.0999447	0.448686
CACNG8	calcium channel voltage-dependent gamma subunit 8	-0.223022	0.251806	-0.521856	0.187927	0.206175	0.351175	-0.40461	0.0686684	0.261706	0.184393	-0.216739	0.254713	-0.779594	0.0343545	0.723666	0.00240763	-0.374087	0.0677021	0.248273	0.278119	-0.49045	0.225357	-0.304124	0.0445492	0.036069	0.780117	0.0922561	0.547348	-0.165093	0.58778	-0.323049	0.0454821	-0.0692785	0.471693	-0.228554	0.102541	-0.222543	0.0470898	-0.721952	0.143761	0.23854	0.310901	-0.257738	0.141812	0.517491	0.0154255	-0.358099	0.255293
PRKACB	protein kinase cAMP-dependent catalytic beta	0.26469	0.0300023	0.419838	0.0624602	1.18191	0.00060253	0.621915	0.00699591	0.382349	0.00723506	0.561146	0.00399376	0.343214	0.0315256	1.24202	0.00056886	0.542357	0.00206985	0.775852	0.0201027	0.317621	0.00221981	0.272089	0.000434078	1.08276	0.000281263	0.33118	0.000148945	0.28068	0.0026105	0.601503	0.000190879	0.329991	6.71224e-06	0.426131	8.83167e-05	0.286232	0.00144779	1.28957	0.000361329	-0.287843	0.0353077	-0.259666	0.0618322	-0.11505	0.0839013	-0.211635	0.29272
CACNG4	calcium channel voltage-dependent gamma subunit 4	0.394897	0.0142845	0.374256	0.0475325	0.278447	0.111446	0.360359	0.0511484	0.197751	0.159201	0.410271	0.0119559	0.291897	0.0345302	0.440817	0.00855882	0.452492	0.0639719	0.402467	0.0390442	0.243431	0.081499	0.265903	0.202669	0.663538	0.00493781	0.42687	0.0713334	0.454042	0.141712	0.112631	0.53091	0.307027	0.177804	0.572945	0.0152722	0.476268	0.0127923	0.734707	0.00577253	0.015374	0.896296	-0.0823598	0.292266	0.162371	0.361037	0.0921334	0.543155
CACNG7	calcium channel voltage-dependent gamma subunit 7	0.162246	0.471969	-0.267316	0.325589	0.333201	0.563832	-0.381761	0.292529	0.553527	0.0058327	0.221718	0.412736	-0.186757	0.389708	0.278496	0.403781	-0.0964539	0.765972	-0.135373	0.230935	-0.0961624	0.380226	0.245302	0.74934	-0.0598544	0.621006	-0.0458903	0.748858	0.403099	0.204421	-0.129065	0.447271	0.151785	0.992484	-0.147496	0.0417707	-0.213254	0.0685397	-0.201475	0.225932	0.0594711	0.811284	0.0805593	0.757376	-0.0547049	0.937392	0.285307	0.407585
CACNG6	calcium channel voltage-dependent gamma subunit 6	-0.426937	0.0758749	-0.0650774	0.732027	0.448489	0.10601	-0.236525	0.387675	0.400205	0.152087	0.319055	0.244163	-0.122727	0.536483	0.604847	0.13431	-0.0633172	0.803255	0.165107	0.209067	0.322137	0.746238	0.079891	0.836562	0.0841517	0.83692	-0.00465062	0.976471	-0.137663	0.403663	0.254669	0.568698	0.298785	0.365345	0.167076	0.883436	0.108403	0.906202	0.0213075	0.794243	0.745991	0.007304	-0.0576493	0.852696	0.156358	0.678428	0.173208	0.358728
MAPRE1	microtubule-associated protein RP/EB family member 1	0.209975	0.0139272	0.189554	0.106359	0.344936	0.0195963	0.131783	0.439313	-0.0444393	0.829337	0.339412	0.000805613	0.0901363	0.286542	0.290936	0.00190006	0.192507	0.26783	0.131341	0.0637444	0.0913409	0.201017	0.116361	0.0801385	0.149913	0.0510416	0.0729511	0.306377	0.217609	0.0634982	0.118914	0.0517962	0.114234	0.316301	0.13895	0.169572	-0.0541959	0.444243	0.25907	0.036078	0.272256	0.0481899	-0.0994179	0.211204	0.150479	0.0268034	0.0661431	0.222739
CCND2	cyclin D2	0.263747	0.202789	0.290089	0.026316	0.391901	0.0178851	-0.255599	0.273009	0.326644	0.0396796	0.517169	0.0265544	0.547798	0.000205811	0.609669	0.00720197	0.0817168	0.621053	0.378681	0.0403871	-0.029087	0.160937	0.350211	0.162876	0.415007	0.0892345	0.398596	0.088446	0.251672	0.240345	-0.00541913	0.322828	0.463638	0.00715752	0.599297	0.000818611	0.423673	0.0875385	0.293115	0.076456	0.253422	0.12976	0.25771	0.00421053	0.217769	0.0932088	0.25608	0.299376
CDC42	cell division cycle 42 (GTP binding protein 25kDa)	0.181381	0.117651	-0.0984691	0.191212	0.100444	0.12686	0.124447	0.133867	-0.0892249	0.283993	-0.0392837	0.100343	-0.108969	0.0887757	0.150695	0.0192045	0.0932226	0.385591	-0.0575465	0.513432	0.254376	0.012921	0.108646	0.193256	0.122641	0.0798111	0.0475002	0.671635	-0.0641915	0.502414	0.256927	0.00688069	0.131206	0.00544002	0.185101	0.0311083	0.0587831	0.499672	-0.155575	0.0512003	-0.0412175	0.215446	0.0650843	0.364705	-0.0741178	0.227817	0.123667	0.0325085
GNG8	guanine nucleotide binding protein (G protein) gamma 8	-0.14565	0.629887	-0.286345	0.468281	0.208444	0.48243	-0.263441	0.442097	0.339056	0.197652	-0.0266682	0.923995	-0.152347	0.59483	0.0185488	0.967116	-0.411364	0.207621	-0.0522643	0.79211	-0.0738539	0.77165	0.278268	0.180352	0.00983257	0.970861	-0.0724351	0.740086	0.246972	0.284065	0.0191006	0.942878	0.0989773	0.640908	0.155898	0.460485	-0.00791562	0.967431	-0.250018	0.187185	0.118981	0.665884	0.133998	0.541323	-0.189895	0.635311	-0.147923	0.503013
TEC	tec protein tyrosine kinase	-0.288833	0.480313	-0.691678	0.218672	0.40333	0.146789	-0.213058	0.617463	-0.0476934	0.908621	0.104504	0.797341	-0.432628	0.364551	0.15612	0.689312	0.0413625	0.92769	-0.675688	0.192867	-0.10595	0.632583	-0.242926	0.391382	-0.123288	0.543995	-0.00759532	0.953218	0.111347	0.594527	0.0300387	0.884976	-0.366317	0.175659	-0.162364	0.454547	-0.10583	0.514539	0.00217834	0.990935	0.393337	0.449802	0.25905	0.575715	-0.24721	0.457515	0.25442	0.460137
TJP2	tight junction protein 2 (zona occludens 2)	0.24315	0.120078	0.232551	0.222101	0.181522	0.344854	0.363175	0.15545	0.426921	0.300781	0.575393	0.0289734	0.350207	0.0944827	-0.113592	0.560198	0.274373	0.0981009	0.352359	0.0913381	0.600568	0.0474994	0.720513	0.000476478	0.405801	0.0763927	0.315496	0.0939519	-0.0304927	0.809626	0.536073	0.0185194	0.61018	0.00702448	0.609901	0.188021	0.43637	0.0506948	0.134863	0.730923	0.568948	0.0188465	0.117657	0.600807	-0.295114	0.128061	-0.19192	0.374505
DDN	dendrin	0.301032	0.064132	0.360654	0.0132478	0.332976	0.0135357	0.481715	0.000434278	0.413522	0.00595714	0.487426	0.00508789	0.329776	0.0272392	0.385327	0.026647	0.363155	0.011099	0.235241	0.181211	0.134488	0.441516	0.174649	0.249422	0.257804	0.00322565	0.289374	0.0155715	0.617057	0.00281704	-0.00823387	0.959358	0.166316	0.185588	0.292029	0.0126255	0.421127	0.000991494	0.504837	0.0103879	0.186394	0.271583	-0.0308782	0.841315	0.0523507	0.675153	-0.11856	0.305356
RASGRF1	Ras protein-specific guanine nucleotide-releasing factor 1	0.282947	0.266676	0.492011	0.0761247	0.636418	0.0885496	-0.175489	0.339841	0.0828205	0.0896698	-0.0604754	0.701842	0.0539613	0.695719	0.279148	0.0365709	-0.16285	0.363346	0.0917399	0.178536	-0.0507741	0.291053	-0.171246	0.308835	0.258296	0.424425	-0.0946316	0.398868	-0.154252	0.476872	-0.0562998	0.458485	0.0381788	0.762727	0.708174	0.00933098	0.251214	0.443769	-0.122028	0.171241	-0.20934	0.36184	-0.386676	0.167461	-0.35727	0.254154	-0.0783411	0.662813
GRM2	glutamate receptor metabotropic 2	0.584139	0.0914948	0.441745	0.293701	0.723194	0.0750077	0.159288	0.710978	-0.11286	0.658913	1.01548	0.0253384	0.561803	0.0900476	0.621475	0.128332	0.679856	0.0733576	-0.0329035	0.783287	-0.197615	0.401228	0.41703	0.0607396	0.112829	0.805116	0.136655	0.678881	-0.177872	0.459136	0.587983	0.238034	0.0143005	0.93071	-0.194974	0.651926	0.536728	0.229063	0.0395734	0.848262	0.431342	0.254244	0.120058	0.618406	-0.101719	0.796485	0.520568	0.133627
CACNA1S	calcium channel voltage-dependent L type alpha 1S subunit	0.140307	0.666019	0.59139	0.132482	0.166881	0.572732	-0.103245	0.714485	-0.0464071	0.325015	0.804485	0.187902	0.138449	0.620924	-0.0446773	0.735131	-0.237347	0.36564	-0.00344203	0.938199	0.303581	0.759275	0.314377	0.352809	0.660184	0.00421407	-0.122272	0.341406	-0.134222	0.602098	0.639316	0.0480082	0.405425	0.367566	0.555427	0.187525	0.217278	0.725309	-0.092999	0.559541	0.664178	0.286156	-0.452941	0.252656	-0.211558	0.35991	-0.134102	0.637361
GRIA1	glutamate receptor ionotropic AMPA 1	0.220278	0.188164	0.105729	0.38058	0.772498	0.113041	0.139172	0.678419	0.114234	0.177083	0.556052	0.0424376	0.216993	0.0464226	0.17553	0.000465448	0.113738	0.292588	0.210594	0.0889719	-0.152237	0.493197	0.0680531	0.47518	0.860146	0.0551714	0.446804	0.110041	0.995031	0.321838	-0.427903	0.376719	0.194885	0.04099	0.731886	0.0741704	0.0768864	0.301297	0.211549	0.0911849	0.52443	0.0571794	0.111264	0.179985	0.146022	0.00339588	0.132606	0.0158334
PLCB1	phospholipase C beta 1 (phosphoinositide-specific)	0.0187691	0.72419	-0.384416	0.406561	0.161667	0.629634	0.242162	0.243998	0.0429533	0.508577	0.418056	0.0751667	-0.010548	0.850987	-0.101473	0.598515	0.216711	0.288465	0.0754978	0.257651	0.12633	0.142965	-0.0391292	0.467173	-0.0991036	0.0729489	-0.561824	0.364856	0.310837	0.669494	0.19728	0.073926	0.108727	0.0428726	0.0740427	0.133158	-0.557012	0.324777	-0.0744989	0.170672	-0.14224	0.0219679	0.329366	0.456651	-0.263141	0.224961	-0.0254507	0.537389
CACNB4	calcium channel voltage-dependent beta 4 subunit	0.439649	0.0482388	0.419793	0.0923877	0.694111	0.00507759	0.513401	0.00481676	0.492142	0.0531131	0.576762	0.00898512	0.397652	0.0142387	0.770954	0.00446966	0.654043	0.0015095	0.529866	0.0260005	0.499104	0.0254581	0.187758	0.472129	0.601387	0.0208731	0.461395	0.0106409	0.640578	0.0145157	0.438117	0.0587763	0.299261	0.113355	0.440769	0.0196805	0.372776	0.110974	0.595326	0.00522673	0.45237	0.130602	0.516129	0.0426618	0.514929	0.143901	0.140642	0.333009
PDE7A	phosphodiesterase 7A	0.203044	0.32718	0.323008	0.0679786	0.426797	0.0238819	0.200184	0.331449	0.198997	0.125359	0.550186	0.00311577	0.276419	0.114193	0.576089	0.0132065	0.371921	0.03458	0.223392	0.131096	0.188708	0.436731	0.516318	0.0284312	0.46649	0.0286953	0.274152	0.166508	0.0532979	0.839706	0.41827	0.0717146	0.508789	0.0208203	0.728897	0.000424549	0.450284	0.0544902	0.210869	0.262614	0.347141	0.0841627	-0.087576	0.592189	0.149291	0.220926	0.241908	0.0216697
PRKAR2A	protein kinase cAMP-dependent regulatory type II alpha	0.340744	0.000617239	0.185459	0.0256743	0.328167	0.00128328	0.338564	0.0334544	0.449798	0.0545814	0.394194	0.000453449	0.16684	0.0090346	0.376026	0.00360069	0.95165	0.000257674	0.406047	0.160007	0.350948	5.47247e-05	0.344837	1.15735e-07	0.307487	0.0018369	0.253546	0.000786525	0.201332	0.216584	0.479686	1.61768e-06	0.441738	0.000773209	0.491536	0.00119336	0.361919	0.000500361	0.518624	0.0108503	0.547678	0.0467612	0.326325	0.0950893	0.412095	0.204309	0.269572	0.145426
CCND1	cyclin D1	-0.298293	0.0379366	0.463879	0.186151	0.307848	0.0909936	0.467877	0.0171939	0.329438	0.224609	0.602078	0.0101568	0.676261	0.0128856	0.437234	0.047276	0.411822	0.0183261	0.631018	0.0106721	0.429922	0.0853398	0.364796	0.187278	0.230763	0.260306	-0.103567	0.167824	0.272966	0.0819674	0.84117	0.00184557	0.50763	0.0506299	0.51118	0.0220557	0.68333	0.0134785	0.40206	0.00926143	0.294794	0.0967515	0.211018	0.175834	0.129385	0.408917	0.215023	0.0755524
ITGA6	integrin alpha 6	0.715439	0.0203485	0.610651	0.0206166	0.54244	0.0622944	0.576616	0.0106372	0.528801	0.0562536	0.484988	0.0134558	0.5703	0.0022341	0.837727	0.00320318	0.223156	0.0734501	0.535346	0.103825	0.530981	0.0268926	0.367571	0.0762488	0.846061	0.00820608	0.65709	0.00898822	0.33051	0.0812727	0.466734	0.0347973	0.686568	0.00481949	0.649658	0.000613378	0.627215	0.00866554	0.569086	0.0282725	-0.230451	0.414398	0.137686	0.0670042	0.477563	0.0756736	0.0897911	0.101589
PRKCI	protein kinase C iota	0.721291	0.00571839	0.69545	0.0127655	0.701049	0.02447	-0.0881724	0.174352	0.871992	0.0128972	0.481246	0.0705251	0.271836	0.13657	0.613338	0.0810593	0.567653	0.100597	0.744987	0.00792373	0.609164	0.0200061	0.489448	0.0698602	-0.119024	0.0120916	0.588967	0.0422927	0.478893	0.064663	0.428513	0.0192319	0.623349	0.000822409	0.6878	0.0172884	0.3999	0.0116645	0.189299	0.414516	0.0978014	0.130703	0.129444	0.0286385	0.0473228	0.429688	0.0698763	0.0874884
AP2A1	adaptor-related protein complex 2 alpha 1 subunit	-0.220544	0.430302	0.20389	0.29154	0.248359	0.315043	0.312756	0.262742	0.163579	0.918726	0.00356384	0.931197	0.0543648	0.793718	0.0509666	0.983732	0.232137	0.437575	-0.189127	0.404659	0.181086	0.769624	-1.94521	0.402054	-0.0024296	0.871592	0.209165	0.510301	0.186816	0.251175	0.193409	0.85006	-1.76944	0.375748	0.365365	0.368034	0.361808	0.401371	0.0970889	0.903846	0.224107	0.346471	-0.149525	0.506062	-0.197392	0.374757	-0.0806196	0.781707
EIF4G1	eukaryotic translation initiation factor 4 gamma 1	0.193603	0.164224	-0.127743	0.387424	0.441764	0.0786076	-0.337724	0.182078	0.317725	0.0327282	0.271021	0.00318608	0.220983	0.036906	0.925721	0.0251869	0.528535	0.0534368	-0.272798	0.0271896	-0.175648	0.182351	0.555064	0.0598276	0.858517	0.0310999	0.347546	0.0208493	0.317503	0.0851959	0.234583	0.118813	0.654705	0.0328115	0.661646	0.0374702	0.495625	0.00249042	-0.200796	0.0187903	0.223276	0.00612423	0.454604	0.0286781	0.483957	0.147764	0.181523	0.0902469
RAC1	ras-related C3 botulinum toxin substrate 1 (rho family small GTP binding protei	-0.124969	0.0106087	-0.0907465	0.22611	0.891495	0.0445721	0.568807	0.0645692	0.459697	0.146768	0.663859	0.0105373	-0.108418	0.11701	-0.0875406	0.0682845	0.426725	0.207301	0.64815	0.0203829	0.31902	0.0021776	0.264472	0.0656355	0.231172	0.0355729	0.269734	0.0175543	0.202866	0.128908	-0.138606	0.162431	-0.127489	0.0736825	0.349764	0.00257865	-0.128184	0.0302301	0.469703	0.154812	0.109878	0.030021	0.264664	0.415868	-0.113829	0.0412844	-0.0208271	0.437977
DAG1	dystroglycan 1 (dystrophin-associated glycoprotein 1)	-0.258895	0.0568058	-0.213647	0.166716	0.456488	0.0122935	0.128336	0.189031	0.336801	0.137771	0.429857	0.00268996	0.271687	0.00112194	0.507274	0.00316414	0.375432	0.00132445	0.435684	0.102387	0.329735	0.00301976	-0.26314	0.0042881	0.275509	0.0650567	-0.182333	0.0419707	0.165308	0.252402	0.40258	0.0107768	0.344772	0.00730738	-0.395621	0.000744905	-0.35368	0.00128172	-0.305242	0.0349016	0.286434	0.0592997	0.127926	0.116313	0.453129	0.263859	0.247096	0.0110567
LOC683626		0.294102	0.00394627	0.0614971	0.480622	0.323294	0.0776238	0.160787	0.329373	-0.0741106	0.487627	0.355063	0.00927413	0.147155	0.00706019	0.303475	0.0750641	0.293071	0.107533	-0.00676595	0.964295	0.134263	0.271066	0.354597	0.0976024	0.0829206	0.719805	0.282584	0.0964756	0.247726	0.0126485	0.242415	0.0582129	0.260127	0.187233	0.153502	0.507185	0.259331	0.145427	0.191953	0.0754073	0.0609614	0.508837	0.0856581	0.229284	-0.0198184	0.825159	0.132284	0.192515
MEST	mesoderm specific transcript homolog (mouse)	0.0943317	0.464671	0.0212447	0.875688	0.450782	0.00781835	-0.0542386	0.644831	-0.201137	0.0791484	0.15669	0.277856	0.190201	0.0992013	0.286173	0.0227804	-0.00107752	0.989669	-0.256701	0.0216069	0.0619176	0.654299	0.00889367	0.949788	0.031825	0.789972	-0.193031	0.14012	-0.157448	0.00276227	0.0234772	0.867586	-0.148499	0.169716	-0.0578168	0.496941	-0.252135	0.0939049	-0.141879	0.0994692	0.062358	0.524622	0.168956	0.116854	-0.164609	0.214477	0.0531611	0.555194
CATNA1		-0.0581613	0.251459	-0.24144	0.0441979	-0.196245	0.24158	-0.0187593	0.876806	-0.139558	0.144199	-0.107694	0.0500567	-0.0951059	0.279224	-0.172661	0.212787	0.0220057	0.721957	0.00371185	0.964417	-0.183838	0.0846034	-0.312119	0.01246	-0.234391	0.0597948	-0.104696	0.168558	-0.0771604	0.383326	-0.143635	0.123062	-0.178335	0.0314569	-0.27828	0.00247265	-0.0632679	0.537861	0.0170421	0.796387	-0.0495332	0.312908	0.146335	0.113595	0.0235841	0.830941	0.040765	0.731644
EIF4A1	eukaryotic translation initiation factor 4A isoform 1	0.123654	0.642948	-0.349018	0.290829	0.688975	0.0607023	0.0931566	0.0781995	0.282648	0.62464	0.0724465	0.329651	-0.161434	0.543881	0.271966	0.178254	0.351872	0.275519	0.0251477	0.83398	-0.102766	0.34833	0.577656	0.0294671	-0.152897	0.482897	0.0698043	0.241997	0.0702813	0.410781	-0.228297	0.0620783	0.375758	0.0855919	-0.323137	0.0473124	-0.117798	0.0604863	-0.0287409	0.673622	0.0914253	0.332576	0.187583	0.45607	-0.417009	0.172246	-0.101812	0.158239
MAN1A		0.285766	0.0810863	0.175269	0.0381095	0.236728	0.252642	0.383088	0.051625	0.287703	0.230722	0.314477	0.111321	0.33988	0.000266602	0.642433	0.00139195	0.6006	0.0551618	0.245717	0.218171	-0.169672	0.345483	-0.112259	0.433521	-0.129921	0.425726	0.0812121	0.434822	0.13694	0.309165	0.0965919	0.38242	0.239617	0.110193	-0.167671	0.037822	0.19755	0.314344	0.243383	0.0856491	-0.122375	0.438668	0.164611	0.0138964	0.405705	0.0255971	0.217512	0.377957
BPHL	biphenyl hydrolase-like (serine hydrolase; breast epithelial mucin-associated an	0.0200855	0.911152	-0.0201292	0.940757	-0.237087	0.177976	-0.276953	0.0792038	-0.197936	0.199428	0.182199	0.315804	0.0480843	0.858061	-0.198919	0.375184	-0.0902792	0.522543	-0.336407	0.0953969	-0.190027	0.358164	-0.166357	0.444473	-0.360647	0.0981261	-0.410918	0.000502886	-0.290906	0.224666	-0.150086	0.507498	0.0470499	0.771212	-0.575054	0.0332996	-0.365753	0.0205585	-0.469587	0.0518722	0.162113	0.277134	0.0682135	0.762708	0.0381676	0.836628	0.186674	0.330535
EHD4	EH-domain containing 4	0.186821	0.299725	-0.141415	0.3017	0.179256	0.330797	-0.266863	0.132113	0.097587	0.149108	0.226481	0.0589906	0.267678	0.0481467	0.225355	0.248014	-0.194477	0.336087	0.139026	0.0854375	0.16408	0.238179	-0.205827	0.0741363	-0.191433	0.200095	-0.3085	0.109275	-0.241628	0.148736	0.196573	0.28329	-0.134305	0.347893	-0.378554	0.0265226	-0.304599	0.1353	-0.138981	0.22604	0.240988	0.260319	0.120641	0.119816	-0.0734022	0.548686	-0.24768	0.030665
PRKCA	protein kinase C alpha	0.502018	0.0114757	0.553579	0.00505746	0.180961	0.276049	0.467743	0.0314763	0.560982	2.68146e-05	0.687017	0.00121328	0.564933	0.000277533	0.561326	0.00772805	0.572697	0.000722411	0.632837	1.08875e-05	0.247401	0.129485	0.442004	0.0236383	0.347532	0.154484	0.27143	0.0516514	0.395697	0.0336681	0.736823	0.00329956	0.658857	0.000130363	0.471678	0.0160533	0.674845	0.00309013	0.670384	4.38117e-05	0.184999	0.236561	0.0113538	0.929042	0.380366	0.0719852	0.104954	0.522014
H2AFV	H2A histone family member V	-0.0459776	0.642283	-0.139522	0.231525	-0.152785	0.146998	-0.236186	0.183716	-0.365043	0.0365591	0.0779372	0.391922	-0.0142656	0.909996	-0.42138	0.00507464	-0.232997	0.208337	-0.251339	0.0897351	-0.270306	0.0796628	-0.169424	0.239525	-0.0795163	0.429439	-0.116109	0.300681	-0.148382	0.287492	-0.299963	0.0787768	-0.204783	0.0761309	-0.34667	0.0217244	-0.211879	0.0987167	-0.174007	0.230437	0.123915	0.22643	0.125257	0.30602	-0.268595	0.0250771	0.00318986	0.97662
RGD1560813		-0.0459776	0.642283	-0.139522	0.231525	-0.152785	0.146998	-0.236186	0.183716	-0.365043	0.0365591	0.0779372	0.391922	-0.0142656	0.909996	-0.42138	0.00507464	-0.232997	0.208337	-0.251339	0.0897351	-0.270306	0.0796628	-0.169424	0.239525	-0.0795163	0.429439	-0.116109	0.300681	-0.148382	0.287492	-0.299963	0.0787768	-0.204783	0.0761309	-0.34667	0.0217244	-0.211879	0.0987167	-0.174007	0.230437	0.123915	0.22643	0.125257	0.30602	-0.268595	0.0250771	0.00318986	0.97662
LOC685909		-0.0459776	0.642283	-0.139522	0.231525	-0.152785	0.146998	-0.236186	0.183716	-0.365043	0.0365591	0.0779372	0.391922	-0.0142656	0.909996	-0.42138	0.00507464	-0.232997	0.208337	-0.251339	0.0897351	-0.270306	0.0796628	-0.169424	0.239525	-0.0795163	0.429439	-0.116109	0.300681	-0.148382	0.287492	-0.299963	0.0787768	-0.204783	0.0761309	-0.34667	0.0217244	-0.211879	0.0987167	-0.174007	0.230437	0.123915	0.22643	0.125257	0.30602	-0.268595	0.0250771	0.00318986	0.97662
NCALD	neurocalcin delta /// neurocalcin delta	-0.0327916	0.577442	-0.138479	0.0038929	0.174102	0.0528045	0.0727756	0.499317	-0.0376305	0.780775	-0.0574194	0.312396	-0.0796441	0.197212	0.0660326	0.385777	-0.0483838	0.524211	0.0573799	0.513484	0.212617	0.00155715	0.158824	0.0139136	0.111638	0.0389277	0.248401	0.0133078	0.156415	0.296353	-0.261027	0.0765579	0.124355	0.0806966	0.238564	0.00176164	0.110858	0.146446	0.0369122	0.704685	0.0784949	0.220934	-0.113546	0.378713	-0.10807	0.0163962	-0.0950707	0.406371
RGD1310357		0.165292	0.109766	-0.529263	0.0937746	0.276214	0.0466944	-0.569999	0.0916277	-0.272484	0.114505	0.298386	0.00738979	0.120609	0.399362	0.159524	0.25753	-0.509463	0.114566	-0.247049	0.345	-0.255242	0.0330779	-0.0393684	0.153444	0.25786	0.35777	0.0626832	0.630419	-0.132582	0.20907	-0.364851	0.00934343	0.14913	0.2703	0.475496	0.260856	-0.460916	0.0123949	-0.235931	0.0390062	0.133094	0.213497	0.583347	0.0807264	-0.605652	0.157782	0.0758376	0.590788
DSCR1L1	Down syndrome critical region gene 1-like 1	0.268124	0.00968703	-0.525846	0.0321106	0.372883	0.0599122	-0.199019	0.0582445	0.51748	0.0728213	0.361489	0.0912366	-0.143698	0.130585	0.159199	0.0307756	-0.290619	0.012422	-0.201828	0.003805	0.106562	0.240805	-0.144687	0.303553	0.574254	0.0414431	-0.181958	0.253793	-0.223569	0.00575164	-0.28583	0.330447	-0.099471	0.123378	0.141606	0.130631	-0.187169	0.0070268	-0.232135	0.140839	0.434247	0.0357881	0.223983	0.295791	-0.355219	0.0238496	-0.0916001	0.334821
RGD1307215		-0.165985	0.151207	0.378352	0.0977269	0.374123	0.0188804	0.412953	0.020178	0.21965	0.1931	-0.332392	0.0339846	0.274795	0.0369008	0.349297	0.0783509	0.336761	0.0738973	0.249913	0.020539	-0.195809	0.0804572	-0.0398973	0.501902	0.133867	0.0505334	0.154492	0.0174407	0.12525	0.0468766	-0.183555	0.293072	-0.0734973	0.500885	-0.139318	0.0885358	0.122244	0.0265417	-0.218984	0.0115171	-0.166407	0.0700551	-0.103557	0.565267	-0.166431	0.231707	0.115331	0.277819
EPRS	glutamyl-prolyl-tRNA synthetase	-0.0982008	0.210385	-0.124782	0.205663	0.557862	0.0132459	0.283814	0.0835367	-0.108753	0.0492624	0.59683	0.000172995	0.283994	0.00670964	0.680976	0.00810124	0.555528	0.0050956	0.400018	0.00129225	-0.263523	0.00163591	0.48014	0.0043353	0.658942	0.00861144	0.153902	0.0579799	0.530988	0.0167704	-0.235127	0.0228578	-0.200982	0.00054705	0.514676	0.000579778	0.239596	0.0146262	0.515713	0.000173108	0.524446	0.000413554	0.191306	0.0375024	0.217311	0.0215279	0.271715	0.00609501
SH2D3C	SH2 domain containing 3C	0.155904	0.327536	-0.0815818	0.496478	-0.341593	0.0231932	-0.11979	0.415714	-0.0143687	0.905401	0.319773	0.0366729	0.00743048	0.939678	-0.432984	0.0146259	-0.249646	0.067524	-0.494945	0.00193889	-0.408828	0.0268352	-0.563089	0.00128909	-0.384873	0.039063	-0.234195	0.0855232	-0.219678	0.267203	-0.37699	0.0848248	-0.402828	0.0210195	-0.366599	0.0275209	-0.198897	0.155342	-0.313195	0.140559	0.16387	0.232657	0.0890123	0.387485	-0.0913908	0.355327	-0.129856	0.276493
SEC24D	SEC24 related gene family member D (S. cerevisiae)	0.365379	0.0255356	0.447365	0.0349523	0.496835	0.0213744	0.602585	0.00522455	0.364582	0.0073742	0.381198	0.0342556	0.516513	0.00140963	0.614974	0.014197	0.661071	0.00092854	0.575312	0.00114466	0.113055	0.421844	0.311325	0.0414061	0.44136	0.00421573	0.146646	0.153855	0.717037	7.58387e-05	0.310747	0.059382	0.400897	0.00156655	0.413503	0.00804952	0.354395	0.00593312	0.779439	4.99946e-05	0.0158185	0.90704	0.0691487	0.58463	0.118139	0.30836	0.058486	0.639423
SHMT1	serine hydroxymethyltransferase 1 (soluble)	-0.300829	0.149424	-0.236641	0.212378	-0.270361	0.130835	0.372585	0.0401157	0.28911	0.15191	0.390715	0.0638874	-0.0980209	0.449921	0.25308	0.175639	0.158722	0.204295	0.382617	0.151799	0.302285	0.220295	0.197142	0.343303	0.123459	0.649707	-0.122731	0.585842	0.220528	0.515209	0.397672	0.108966	0.3545	0.13324	0.355385	0.276933	0.408143	0.227251	0.148211	0.75154	0.519452	0.116384	-0.177913	0.509735	0.441455	0.0990646	-0.213863	0.211118
BICC1	bicaudal C homolog 1 (Drosophila)	-0.146018	0.41136	-0.233205	0.275859	-0.280733	0.0152055	-0.351469	0.071975	-0.0581488	0.365952	0.33524	0.235406	-0.104644	0.145945	-0.383671	0.00196345	-0.338497	0.119578	-0.186692	0.382405	-0.410803	0.102173	-0.0509355	0.543079	-0.152977	0.27912	-0.250554	0.128233	0.0583882	0.735803	-0.376607	0.18617	0.096119	0.480746	-0.302077	0.00286644	-0.49556	0.0246213	-0.148302	0.212777	0.293436	0.272915	-0.0383923	0.602683	-0.102938	0.298351	-0.369154	0.0557081
SYT1	synaptotagmin I	0.0882747	0.102319	0.32223	0.0113094	0.235609	0.0319515	0.380982	0.0365146	0.305417	0.047517	0.311634	0.0139124	0.215967	0.0902275	0.579257	0.000664447	0.547121	0.00036328	0.157727	0.0105684	0.139599	0.029965	0.0506865	0.163399	0.516819	0.00970637	0.302241	0.103605	0.214082	0.0345768	0.122925	0.0107945	0.0926307	0.0389751	0.504336	0.00033413	0.144511	0.0282669	0.304219	0.00757467	-0.159399	0.0418964	-0.106263	0.314026	0.343647	0.0121712	0.10814	0.0768241
LOC679161		0.27151	0.0056505	0.410338	0.102881	0.599652	0.0236379	0.544802	0.000524664	0.304775	0.0224564	0.213344	0.0258366	0.155528	0.226512	0.42026	0.0261615	0.564325	0.00428184	0.339908	0.0175561	0.199508	0.0390942	0.360306	0.0695596	0.236894	0.0173897	0.215505	0.103206	0.343319	0.28705	0.319939	0.0192839	0.389198	0.0040683	0.407268	0.0851201	0.425366	0.0588377	0.367176	0.0567821	0.0724109	0.261736	-0.338411	0.143024	-0.121571	0.195248	0.0493665	0.673077
PIK3CA	phosphoinositide-3-kinase catalytic alpha polypeptide	0.11436	0.267473	0.242892	0.0024346	0.491275	0.000132197	0.359512	0.00296253	0.30153	0.0113283	0.448876	0.00188182	0.242497	0.00348363	0.454958	0.00464177	0.427216	0.00187997	0.457024	0.0100732	0.149943	0.170316	0.146335	0.0688858	-0.299822	0.00390569	-0.577457	0.000156616	0.419881	0.0393588	0.19589	0.0101631	0.397235	0.000106305	0.313544	0.0100137	-0.411761	0.0128671	0.33088	0.0641241	0.392533	0.0433538	-0.261042	0.112829	0.22128	0.0697452	0.205695	0.165213
NFKBIA	nuclear factor of kappa light polypeptide gene enhancer in B-cells inhibitor al	0.492407	0.00842235	0.374648	0.0375948	0.267548	0.115379	-0.0130682	0.950284	0.0874191	0.701692	0.711828	0.00187056	0.301092	0.0351744	0.281182	0.122646	0.0742842	0.777327	0.0630702	0.731467	0.359863	0.00686003	0.039983	0.824975	0.255368	0.0376051	0.208224	0.0489859	0.191754	0.206107	0.199336	0.0753873	0.0380124	0.810688	0.136684	0.303786	0.0918874	0.443926	0.097595	0.374578	0.219421	0.211408	-0.0735566	0.328861	0.0136339	0.905329	0.0873523	0.634062
TIPARP	TCDD-inducible poly(ADP-ribose) polymerase	0.802998	0.00652334	0.843812	0.0574385	0.195179	0.0691399	0.611627	0.0275763	0.306648	0.225566	0.718056	0.0492562	0.33957	0.00255845	0.376504	0.37102	0.261287	0.0660708	0.389055	0.0603946	0.90522	0.0250216	0.11582	0.243228	0.752332	0.00317869	0.30216	0.302383	-0.227721	0.64347	1.03904	0.00160266	0.236468	0.0133412	0.789897	0.0102133	0.634263	0.288227	0.250105	0.537372	0.0573192	0.732436	0.157408	0.0771579	-0.106629	0.30217	0.105782	0.381655
PRKCE	protein kinase C epsilon	0.544547	0.00391083	0.432105	0.00417558	0.760804	8.09032e-06	0.427283	0.000946999	0.397852	0.00133778	0.658116	0.00016618	0.490937	0.000177841	0.930638	7.20025e-06	0.719115	0.000354872	0.540381	0.00754935	0.417714	0.00446105	0.294668	0.0104465	0.74791	5.15502e-05	0.178743	0.0539571	0.241737	0.0901687	0.590615	0.00143772	0.512478	0.00405332	0.658745	0.00179649	0.637127	0.0003305	0.62157	0.00035383	0.281201	0.0941012	0.0588312	0.446808	0.18188	0.0146656	0.291832	0.0208213
DVL3	dishevelled dsh homolog 3 (Drosophila)	0.433056	0.0782389	0.169278	0.0522397	0.705574	0.0224437	0.501587	0.0284289	0.269761	0.251362	0.318392	0.201813	0.00324438	0.968374	0.929425	0.00856091	0.321231	0.208683	0.0862417	0.31076	0.0207417	0.725997	0.26746	0.216757	0.315207	0.0715435	-0.127782	0.0676701	-0.107663	0.266127	-0.282844	0.118838	0.402597	0.0300019	-0.0548618	0.278752	0.596555	0.0456552	0.420017	0.0100638	0.069838	0.35526	-0.166033	0.0631503	0.223851	0.384698	0.0568802	0.36736
RGD1565043		-0.141529	0.440913	-0.135795	0.663583	-0.321761	0.136386	-0.212852	0.0466644	0.118932	0.434901	-0.121915	0.564488	-0.0787509	0.737737	-0.247862	0.216834	-0.0473392	0.639961	-0.139148	0.277664	-0.394434	0.00239359	0.108408	0.589912	-0.209897	0.185726	-0.348847	0.0476408	0.112825	0.472921	-0.180778	0.158985	0.0389309	0.815273	-0.50001	0.0137961	-0.204382	0.0953188	0.290827	0.140807	0.0196141	0.90602	0.0570439	0.810635	0.0738993	0.59283	0.165513	0.190743
RGD1563612		0.0845068	0.386963	0.246226	0.466429	0.207104	0.00239214	0.103591	0.416915	0.288593	0.0916178	0.46881	0.0155149	0.386893	0.018228	0.317338	0.0253391	0.225131	0.172085	0.344317	0.0592617	-0.253888	0.000968178	0.141745	0.0690067	0.464824	0.0137303	0.0972694	0.0663903	0.383988	0.0176263	0.384263	0.0197538	0.0698371	0.210792	0.50755	0.0252287	-0.189604	0.235479	0.40278	0.0755724	0.340407	0.0098361	-0.273143	0.00185822	-0.248669	0.00613101	0.12154	0.28561
SOS1	son of sevenless homolog 1 (Drosophila)	-0.233485	0.314109	0.026931	0.90252	0.104987	0.230107	0.289017	0.278811	0.474461	0.017721	-0.0756321	0.464151	0.0414117	0.435842	0.462052	0.137311	0.287941	0.259717	0.428451	0.103743	-0.10819	0.274699	-0.144703	0.107863	0.112027	0.475471	-0.202468	0.0178361	-0.0772215	0.41015	0.0916228	0.427507	-0.0442463	0.795858	-0.138256	0.0176486	0.0697831	0.499027	-0.0815094	0.132694	0.095272	0.61835	0.0400585	0.429737	0.387437	0.112923	0.0536105	0.467696
PHYHIP	phytanoyl-CoA 2-hydroxylase interacting protein	-0.119687	0.319923	-0.084479	0.569318	-0.225953	0.0691715	-0.14626	0.268415	-0.117022	0.373762	-0.0958017	0.457562	0.0323796	0.802172	-0.214232	0.0481733	-0.192848	0.167833	-0.0273121	0.785454	-0.0680897	0.509675	0.024349	0.775356	-0.212715	0.0868872	0.153719	0.170285	0.257896	0.127474	0.112329	0.500061	0.0503822	0.728087	-0.0551464	0.712121	0.198469	0.0821257	0.0529674	0.785097	0.0238856	0.860364	0.116859	0.312965	0.0117205	0.868847	-0.0465876	0.667646
FOS	v-fos FBJ murine osteosarcoma viral oncogene homolog	-0.0334153	0.927517	-0.062078	0.797373	0.0971619	0.539048	-0.14422	0.513006	0.0583822	0.714699	0.123206	0.75833	-0.0242438	0.889823	0.0884731	0.57535	0.141985	0.622483	0.151248	0.393205	0.660981	0.0315201	-0.340931	0.428548	0.251422	0.335445	0.117899	0.510901	0.136121	0.528311	1.21124	0.00115356	-0.68584	0.0946085	0.390851	0.250966	0.258049	0.472939	0.0835254	0.708634	0.156622	0.319679	0.0378342	0.800887	-0.00868881	0.963066	0.286205	0.244632
PPP2R1A	protein phosphatase 2 (formerly 2A) regulatory subunit A (PR 65) alpha isoform	0.791036	0.00653044	1.11986	9.02073e-05	0.905697	0.000128345	0.864727	0.0017104	1.07342	0.000200366	0.980222	0.000332461	1.00062	1.96138e-05	0.955147	0.00157824	1.14027	4.80272e-05	1.03031	0.0011393	0.268984	0.00199671	-0.279286	0.0412803	1.02838	9.17384e-05	0.868588	3.83737e-05	1.02404	9.50054e-05	-0.416868	0.0136898	0.561202	0.0203619	0.664742	0.00307725	0.967695	1.22896e-05	1.15952	0.000195194	0.0655376	0.341285	-0.119236	0.227647	-0.0736039	0.453666	-0.12622	0.0704431
EIF4EBP2	Eukaryotic translation initiation factor 4E binding protein 2	0.725312	3.32872e-05	0.573242	0.00280239	0.477321	0.0245263	0.66119	0.0346741	0.497329	0.0277371	1.05334	4.46064e-06	0.604255	0.000744899	0.733421	0.00589831	0.577469	0.0724419	0.612335	0.00303357	0.51465	0.00655619	0.409521	0.00666653	0.450316	0.004203	0.45014	0.0172774	0.658072	3.77281e-05	0.403497	0.0890204	0.437318	0.0135367	1.08464	0.00112527	0.738879	0.00601544	0.683258	0.00516699	0.328027	0.000664263	0.0310137	0.674856	0.256101	0.0826027	-0.0837204	0.731429
CDH8	cadherin 8 type 2	0.274085	0.269836	-0.385611	0.422194	0.501013	0.0967498	-0.0770694	0.728263	-0.204786	0.300378	0.254166	0.407765	-0.277748	0.486486	0.170653	0.658184	0.0211456	0.899781	-0.456628	0.160388	0.645018	0.0778419	-0.0941015	0.532409	-0.0555493	0.664323	-0.0128814	0.94136	-0.281129	0.563827	0.0291369	0.915527	-0.298678	0.168248	-0.0832937	0.33179	0.00240726	0.860336	-0.450089	0.135951	-0.0199184	0.899866	0.107863	0.69311	-0.33036	0.309516	0.0982151	0.648177
SFRP2	secreted frizzled-related protein 2	0.459833	0.0527385	-0.431569	0.07184	0.659035	0.00039814	0.326572	0.11271	0.460107	0.00331794	-0.560614	0.00202732	-0.775406	0.00493059	0.955344	0.000524614	0.413424	0.0395738	0.239237	0.0343158	-0.157231	0.164401	0.279211	0.0318757	0.525358	0.00665706	0.279427	0.159883	0.434198	0.0979124	0.385545	0.00889969	-0.454528	0.0202589	0.314215	0.00796932	0.494476	0.0119829	0.483676	0.0215251	-0.405796	4.94435e-05	-0.343836	0.0999739	0.296308	0.0415444	-0.244315	0.227032
LRP6	low density lipoprotein receptor-related protein 6	0.480965	0.00147585	0.153387	0.257278	0.780963	0.034502	0.441123	0.031968	0.661381	0.00109187	0.497642	0.0302219	0.483648	0.001568	0.622644	0.0191541	0.604863	0.0373502	0.500175	0.0383253	0.447294	0.0321221	0.445008	0.00255762	0.300697	0.0145808	0.433151	0.161865	0.312694	0.101126	0.6885	0.0011671	0.605179	0.00147689	0.832454	0.000409171	0.439512	0.00703068	0.476981	0.0108585	0.539589	0.0114492	0.192338	0.0332023	0.336183	0.173597	0.247577	0.00258261
SEMA6A	sema domain transmembrane domain (TM) and cytoplasmic domain (semaphorin) 6A	0.764626	0.00129489	0.527096	0.00231384	1.45672	0.000704138	0.653502	0.0267348	1.16674	0.00130202	0.979806	7.97367e-06	0.571554	5.40293e-05	0.705175	0.000350993	0.713964	0.0369783	0.941119	0.00149749	0.801537	0.0168138	0.924362	4.14539e-05	0.387953	0.00981696	1.13718	9.92695e-05	0.998076	0.00273121	0.485435	0.00771736	0.841685	0.000621639	1.2667	4.69064e-05	1.18734	0.000739211	1.15721	0.00158494	0.363156	0.0103939	0.153633	0.465167	0.457456	0.0447601	0.71977	0.0160391
RGD1559693		0.116138	0.690087	0.443461	0.226165	-0.705274	0.0459253	-0.311563	0.077047	0.19742	0.217006	0.141047	0.56388	0.683967	0.0111949	-0.385095	0.127507	-0.101703	0.204568	-0.0565111	0.791575	-0.311913	0.050105	-0.262614	0.0500916	0.118185	0.376004	-0.342689	0.00304663	-0.329271	0.0223245	-0.23823	0.131084	0.0898725	0.581835	-0.3417	0.0159192	-0.214956	0.0109767	-0.353413	0.0699447	0.17134	0.272053	0.219421	0.12565	-0.20884	0.201578	0.599014	0.0443006
PPP4C	protein phosphatase 4 (formerly X) catalytic subunit	0.142882	0.115284	0.0943813	0.500299	0.356741	0.0313749	0.23234	0.182266	0.141766	0.357898	0.171107	0.072439	0.150411	0.250299	0.0981702	0.427226	0.149867	0.348778	0.331264	0.0340838	0.0269203	0.864433	0.0020578	0.985336	0.296992	0.176248	0.21698	0.22273	0.412668	0.0375639	0.092295	0.527058	0.0148346	0.854564	0.272746	0.118938	0.329711	0.00917262	0.47478	0.0338627	0.0282254	0.560485	0.0560294	0.68866	-0.258571	0.0388763	-0.0824726	0.442174
TRAIP	TRAF interacting protein	0.0613242	0.573469	-0.102794	0.47136	-0.152371	0.0675463	-0.0843655	0.47047	-0.306729	0.0158379	-0.0540972	0.612787	-0.136739	0.272929	-0.337765	0.00373149	-0.0884746	0.434654	-0.263264	0.0244813	-0.399841	0.0539966	-0.231739	0.152523	-0.120917	0.277159	-0.228441	0.0112983	-0.0849118	0.45208	-0.38477	0.0920659	-0.109368	0.400187	-0.465685	0.00030473	-0.189989	0.141389	-0.0128564	0.87034	-0.115421	0.259762	-0.0339446	0.728107	-0.185395	0.037683	-0.00410909	0.967653
CACNA2D3	calcium channel voltage-dependent alpha 2/delta 3 subunit	0.172416	0.339271	-0.0509025	0.586813	0.633892	0.0937819	0.08649	0.229528	-0.0345493	0.477378	0.458529	0.00696042	-0.103967	0.227136	0.610809	0.0754096	0.130248	0.0774093	-0.41979	0.302101	0.0488955	0.378602	-0.00796058	0.910393	0.632657	0.0443709	0.104636	0.150315	0.0746979	0.379158	0.057987	0.339868	0.376887	0.571866	0.201269	0.639798	0.185469	0.0194187	-0.506951	0.326038	0.286113	0.105553	-0.0530649	0.315352	0.021604	0.596558	0.043758	0.556512
TTC23	tetratricopeptide repeat domain 23	-0.504856	0.0410758	-0.0387639	0.857689	-0.375788	0.15446	-0.186618	0.489024	-0.102957	0.68032	0.0291012	0.879229	-0.0992707	0.561396	0.01462	0.948972	-0.195857	0.253584	-0.125874	0.526134	-0.276648	0.121188	-0.176002	0.176472	-0.141415	0.270179	-0.25731	0.293947	0.0371219	0.740191	-0.00684631	0.948082	-0.0245304	0.787593	-0.247855	0.0580056	-0.344563	0.116519	-0.387056	0.0553765	0.533957	0.00862669	-0.0605069	0.426014	0.390408	0.270118	-0.00923939	0.975803
FNDC3A	fibronectin type III domain containing 3A	0.0911264	0.372344	0.351201	0.0194808	0.459945	0.0337008	0.529874	5.74141e-05	0.119716	0.390109	0.376923	0.00129402	0.195768	0.288263	0.421518	0.0560206	0.39145	0.00571084	0.0996425	0.464816	0.268816	0.184211	0.249769	0.136109	0.554787	0.0218334	0.406319	0.0814229	0.368086	0.193965	0.234228	0.248208	0.21925	0.0998774	0.175389	0.0873261	0.460814	0.0574601	0.47469	0.045581	0.285797	0.00976506	-0.155433	0.346523	0.0610758	0.7929	-0.138424	0.150338
RGD1559896		0.449519	0.0270514	-0.142264	0.522583	-0.292598	0.00990407	-0.289501	0.100146	0.235356	0.226213	0.218991	0.331734	-0.253917	0.199714	-0.407621	0.00838946	-0.256504	0.138868	-0.244916	0.162991	-0.301692	0.0191972	-0.155202	0.226874	-0.273128	0.0632722	0.202035	0.214644	-0.215388	0.162325	-0.152287	0.304341	-0.273434	0.0501822	-0.500454	0.00506481	-0.0953562	0.214588	-0.163294	0.237521	-0.230528	0.0251636	-0.111653	0.31648	0.245308	0.141794	0.127226	0.446835
LOC683481		-0.244581	0.0153997	-0.508359	0.0155092	-0.241933	0.263306	-0.340709	0.272445	-0.184849	0.0494462	-0.613496	0.000138027	-0.46605	0.000859091	-0.492172	0.0162308	-0.629016	0.0746479	-0.595274	0.000114876	-0.220932	0.0572841	-0.221734	0.145458	-0.325756	0.0121744	-0.400734	0.00531531	-0.188334	0.0552463	-0.380608	0.00194874	-0.336713	0.0162872	-0.436098	0.00228186	-0.383818	0.000140498	-0.486724	0.00028482	-0.368914	0.00190802	-0.414535	0.00277152	-0.25276	0.277758	-0.288307	0.0406403
LOC685284		-0.244581	0.0153997	-0.508359	0.0155092	-0.241933	0.263306	-0.340709	0.272445	-0.184849	0.0494462	-0.613496	0.000138027	-0.46605	0.000859091	-0.492172	0.0162308	-0.629016	0.0746479	-0.595274	0.000114876	0.489116	0.0167387	-0.221734	0.145458	-0.325756	0.0121744	-0.400734	0.00531531	-0.188334	0.0552463	-0.380608	0.00194874	-0.336713	0.0162872	-0.436098	0.00228186	-0.383818	0.000140498	-0.486724	0.00028482	-0.368914	0.00190802	-0.414535	0.00277152	-0.25276	0.277758	-0.288307	0.0406403
RYR2	ryanodine receptor 2 (cardiac)	0.302328	0.0442905	0.215432	0.0861182	0.687961	0.000138588	0.397154	0.100358	0.753051	0.0133587	0.75738	0.000622154	0.78281	8.63277e-05	1.19933	0.000179123	0.650396	0.0213468	0.934542	0.00204116	0.236969	0.263276	0.380585	0.0218192	0.78147	0.00124459	0.222979	0.0592512	0.808632	0.000865221	0.630265	0.00867249	0.505339	0.00978061	0.729124	0.0184767	0.584468	0.00310102	0.638094	0.00214054	0.455051	0.0193352	0.567378	0.00120418	0.186498	0.00132466	0.253241	0.0846902
MDM2	Mdm2 transformed 3T3 cell double minute 2 p53 binding protein (mouse)	-0.22179	0.0111026	-0.185371	0.0528768	0.573538	0.00430948	-0.167232	0.00224757	-0.235919	0.0507078	0.410766	0.00401854	0.251364	0.0293887	-0.271835	0.000483634	-0.246758	0.00534256	-0.25333	0.0566867	-0.283054	0.00676289	-0.256884	0.302017	-0.21704	0.0207426	-0.199035	0.0503021	-0.161051	0.00736929	-0.261447	0.0131919	-0.15425	0.15773	-0.208674	0.0348552	-0.305911	0.0157694	-0.216873	0.00566833	0.120308	0.0496656	0.183834	0.0714136	-0.119886	0.0706667	0.618358	0.0322431
SHC3	SHC (Src homology 2 domain containing) transforming protein 3	0.182081	0.6283	-0.107982	0.693195	0.312087	0.393404	0.372072	0.377994	0.436467	0.208115	-0.137941	0.664741	0.457073	0.146594	0.0514592	0.959645	0.513561	0.0835202	0.374197	0.180212	0.268331	0.576175	0.0457058	0.706227	0.208782	0.450368	0.0621296	0.74005	0.0125273	0.953059	0.0983687	0.986146	0.0774092	0.759608	0.0330727	0.537838	0.374898	0.18888	-0.032913	0.790053	-0.320022	0.367846	0.565055	0.0623387	-0.260628	0.335417	0.141488	0.61463
VOF16		0.576074	4.45062e-06	0.586492	0.000145936	0.697428	6.71674e-05	0.40663	0.00600185	0.224628	0.00123597	0.91415	3.34245e-07	0.648823	2.013e-05	0.898232	0.000115604	0.654667	0.000461191	0.51103	1.76777e-06	0.47727	1.7661e-05	0.557936	1.69026e-05	0.647436	3.18059e-05	0.575573	6.50991e-06	0.3433	0.00389523	0.56945	7.42612e-05	0.753587	1.17006e-05	0.578874	2.91273e-05	0.567911	0.000197312	0.623954	0.00213702	0.338076	0.00119062	0.147699	0.130117	0.200804	0.0463565	0.198218	0.0429966
FARP1	FERM RhoGEF (ARHGEF) and pleckstrin domain protein 1 (chondrocyte-derived)	0.744804	0.0106476	0.390031	0.069774	0.51148	0.0774372	-0.503789	0.137173	-0.297661	0.0349769	0.894628	0.00286923	0.646961	0.00124655	0.881208	0.00240055	0.668702	0.0107506	0.415665	0.0302337	0.151709	0.33272	0.318823	0.103528	0.803931	0.000298997	-0.176659	0.00559665	-0.273842	0.0776831	0.279851	0.0908211	0.307771	0.036091	0.711989	5.91247e-05	0.34843	0.0423671	0.376862	0.0412435	0.201351	0.157258	0.256929	0.0293584	0.369728	0.0545073	0.467665	0.0687512
OMG	oligodendrocyte myelin glycoprotein	-0.0521694	0.673356	-0.016524	0.895034	0.278301	0.0360792	0.260132	0.147692	0.12976	0.100359	-0.18747	0.0907193	0.10829	0.29238	0.0773986	0.504312	0.278158	0.159847	0.163667	0.0784503	-0.0213344	0.850722	-0.132874	0.11017	-0.00835808	0.909138	0.143789	0.0915001	0.258895	0.00464826	-0.0327308	0.79166	-0.144308	0.124837	-0.0178048	0.854252	0.133265	0.208049	0.121998	0.0594092	-0.1353	0.363358	0.124814	0.405324	-0.200902	0.155019	0.0180265	0.861782
KCNQ5	potassium voltage-gated channel KQT-like subfamily member 5	-0.667904	0.072013	0.551844	0.0221024	0.634982	0.148686	0.526004	0.198508	-0.0130874	0.941468	-0.371614	0.336359	0.32164	0.10542	0.295585	0.609785	0.413465	0.358322	-0.466476	0.217453	0.687672	0.0291709	-0.0775146	0.707015	0.122079	0.56094	0.479775	0.0601694	-0.46357	0.125552	0.0878719	0.817958	0.106381	0.54774	0.300838	0.30217	0.518424	0.0611001	-0.34293	0.434861	0.29629	0.381603	-0.230204	0.285249	-0.339397	0.456791	-0.112539	0.697717
RGD1561967		0.43727	0.00167596	0.342994	0.00691714	0.557422	0.00246296	0.390415	0.0617597	0.500987	0.00290365	0.462951	0.00160294	0.390881	0.00119617	0.667682	2.76654e-05	0.579575	0.00336444	0.503063	0.00430007	0.277757	0.00596739	0.254322	0.020274	0.646874	0.000233732	0.666108	1.55624e-05	0.511532	0.000125916	0.383106	0.00049115	0.270212	0.00165134	0.632133	1.19168e-05	0.795681	5.90015e-06	0.512132	0.00028134	0.0256805	0.6503	0.314775	0.165756	0.11026	0.195967	0.18916	0.0984657
WNT10A	wingless-type MMTV integration site family member 10A	-0.0775777	0.704751	-0.133774	0.443358	0.425544	0.0510388	0.195718	0.444887	0.71102	0.0186138	-0.145749	0.449064	-0.114515	0.417607	0.560111	0.0436337	0.0413459	0.885726	0.401208	0.0219147	0.215045	0.981633	0.43564	0.224143	0.494013	0.175856	-0.0299959	0.925362	0.0995129	0.632488	0.176017	0.916534	0.597442	0.18569	0.40949	0.29452	0.604016	0.171186	0.374785	0.130083	-0.0681714	0.605998	0.0192592	0.879399	0.134566	0.633792	-0.154372	0.524693
MAPK8	mitogen-activated protein kinase 8	0.16344	0.0747426	0.111125	0.11155	0.256291	0.0757947	0.143339	0.231271	0.196976	0.362998	0.182194	0.0250563	0.295718	0.255765	0.145882	0.260216	-0.0406926	0.618857	0.119205	0.18633	0.272808	0.0263908	0.315129	0.00349797	0.537758	0.00185021	0.130467	0.099128	0.8717	0.113812	0.112922	0.291533	0.262604	0.00489109	0.405548	0.114035	0.0745064	0.486585	0.241889	0.32941	0.298518	0.186548	0.300725	0.306478	-0.110409	0.216031	-0.184032	0.168025
LOC686866		-0.104837	0.523257	-0.276027	0.151099	0.201765	0.502618	-0.192262	0.256429	-0.101552	0.316972	0.372923	0.0454574	-0.133836	0.510695	0.216067	0.598813	-0.194698	0.301436	-0.328525	0.0183976	0.674947	0.0384398	0.417393	0.167736	0.207529	0.415073	-0.0568319	0.619701	-0.0530964	0.707058	0.604095	0.192658	0.396471	0.181987	0.378911	0.221622	0.627365	0.0129781	0.0628639	0.935361	0.296178	0.219985	0.206937	0.48588	-0.0699687	0.509925	0.214577	0.312208
LOC689377		-0.104837	0.523257	-0.276027	0.151099	0.201765	0.502618	-0.192262	0.256429	-0.101552	0.316972	0.372923	0.0454574	-0.133836	0.510695	0.216067	0.598813	-0.194698	0.301436	-0.328525	0.0183976	0.674947	0.0384398	0.417393	0.167736	0.207529	0.415073	-0.0568319	0.619701	-0.0530964	0.707058	0.604095	0.192658	0.396471	0.181987	0.378911	0.221622	0.627365	0.0129781	0.0628639	0.935361	0.296178	0.219985	0.206937	0.48588	-0.0699687	0.509925	0.214577	0.312208
RGD1564804		-0.303842	0.0222044	-0.11514	0.658295	-0.13339	0.263075	-0.215692	0.0922027	-0.256213	0.00329544	-0.164688	0.149202	-0.290763	0.185263	-0.523465	0.00872161	-0.364629	0.0401433	-0.434211	0.00580429	-0.258553	0.0642366	-0.400239	0.0051258	-0.302261	0.0122045	-0.362466	0.0140446	-0.243749	0.0917468	-0.378615	0.011716	-0.366708	0.00336885	-0.540723	0.00297653	-0.693176	0.0177905	-0.182625	0.185548	0.139154	0.303282	-0.175623	0.305692	-0.390075	0.0198134	-0.23645	0.0759766
LRRC4C	leucine rich repeat containing 4C	0.28413	0.15057	0.307112	0.207513	0.529109	0.0442142	0.185452	0.188311	0.186537	0.0415935	0.528272	0.0317623	0.278148	0.10399	0.665387	0.0270454	0.203621	0.145537	0.324131	0.0402266	0.226755	0.0113521	0.448443	0.00814372	0.406679	0.0454765	0.0560061	0.459313	0.13911	0.138716	0.500898	0.00823712	0.499968	0.00218715	0.181715	0.00945414	0.107605	0.238941	0.156448	0.149197	0.244142	0.200923	-0.0162018	0.842897	0.136278	0.275114	0.0181685	0.713081
RGD1560155		0.0967738	0.170111	0.217307	0.0441161	0.222953	0.237867	0.204725	0.0333321	0.245093	0.0293364	0.465343	2.76244e-05	0.273836	0.00264309	0.361508	0.0330604	0.31554	0.00816854	0.230393	0.0886654	0.140023	0.276286	0.30765	0.0567258	0.430156	0.00327195	0.222755	0.0386256	0.340859	0.092434	-0.125618	0.509557	0.423772	0.0121608	0.427346	0.0206219	0.263874	0.0206249	0.252514	0.0967215	0.368569	4.55911e-05	0.128192	0.390828	0.222187	0.0724029	0.110814	0.27851
EPHB2	EPH receptor B2	-0.197013	0.27636	-0.147964	0.55145	0.335252	0.11994	-0.45822	0.0837533	0.109326	0.831507	0.494335	0.0166166	-0.257251	0.152014	0.385286	0.0419139	-0.544923	0.023412	-0.179003	0.244919	-0.569092	0.0699927	-0.472062	0.0348477	0.4271	0.0998641	-0.254444	0.248992	-0.202866	0.479408	-0.447742	0.146	-0.526033	0.00875087	-0.302877	0.0970053	-0.454003	0.0483217	-0.219357	0.280127	0.274574	0.105466	0.278143	0.298293	0.0500346	0.69806	0.0891432	0.589185
RGD1563912		0.323471	0.11614	0.385195	0.0448899	-0.578386	0.053232	-0.384172	0.0571174	0.203666	0.179101	-0.537263	0.00118285	0.441273	0.0261286	-0.787214	0.0171108	-0.73592	3.73986e-05	0.281195	0.0716037	0.256336	0.0551403	0.404216	0.00107555	0.646656	0.00338831	-0.188914	0.0160904	0.15349	0.183788	-0.87877	0.0256482	0.342349	0.000486922	-0.216179	0.0849358	0.215483	0.117313	-0.753191	0.0881803	-0.381951	0.0248784	0.222559	0.189012	0.366581	0.0550474	0.246477	0.0778648
SNX7	sorting nexin 7	-0.017862	0.900779	0.253623	0.241569	0.362355	0.1047	0.223173	0.37594	0.0047029	0.984051	0.246136	0.0471933	0.367235	0.0596853	0.535042	0.0140459	0.239324	0.38068	0.212417	0.270644	-0.0715442	0.642302	-0.0330601	0.816801	0.344	0.0503847	0.525157	0.00214188	0.281517	0.193888	0.0421444	0.800019	0.132095	0.352015	0.240247	0.0908185	0.410392	0.00107383	0.133914	0.589179	0.263998	0.137271	0.113612	0.402973	0.172687	0.202737	0.0161515	0.912112
RGD1562038		-0.393279	0.0427469	-0.281452	0.0113411	-0.425148	0.00622192	-0.459151	0.000489011	-0.342258	0.000594437	-0.656142	0.0146702	-0.659323	3.48058e-05	-0.524883	0.0013269	-0.6117	1.24583e-05	-0.704254	5.75107e-05	-0.252813	0.145246	-0.586304	0.0011922	-0.497613	0.00245361	-0.415924	0.0562926	-0.317764	0.00230403	-0.378586	0.0405458	-0.512353	0.00223348	-0.683932	0.000149731	-0.559966	0.0292999	-0.428066	0.000336326	-0.262863	0.00906414	-0.377871	0.00056416	-0.0997349	0.372913	-0.152549	0.171472
MFHAS1	malignant fibrous histiocytoma amplified sequence 1	0.24213	0.14474	0.162629	0.284431	0.733976	0.0023792	0.422524	0.0812406	0.557907	0.0495574	0.337602	0.128211	0.430428	0.0221456	0.846301	0.000188258	0.502518	0.00875199	0.550659	0.0218279	0.159839	0.655948	0.489111	0.101299	0.464529	0.0176931	0.226248	0.0934549	0.538818	0.0235535	0.473232	0.0729234	0.405608	0.0447085	0.472953	0.0357902	0.47223	0.00153571	0.187428	0.444543	0.166552	0.28678	0.278931	0.0912632	0.530406	0.0402516	0.324006	0.0334456
RPS6KA2	ribosomal protein S6 kinase 90kDa polypeptide 2	0.481952	0.0902645	-0.0592445	0.820597	0.47137	0.032989	-0.127573	0.66619	0.248538	0.688087	0.179404	0.769804	-0.191326	0.361999	-0.0496209	0.531191	-0.0516898	0.836098	-0.255282	0.378381	0.445911	0.250478	0.303326	0.50231	0.374027	0.245482	-0.159185	0.517411	0.163415	0.359182	0.702506	0.0802777	0.452286	0.168658	0.0875616	0.661102	0.384545	0.112017	0.239527	0.522303	-0.302548	0.429791	-0.132081	0.659348	-0.520991	0.0231615	0.0758827	0.853229
LOC683729		-0.30586	0.262764	-0.138589	0.550667	-0.206275	0.225222	0.154749	0.577042	0.121668	0.655084	-0.125459	0.569018	-0.502054	0.0201022	-0.429205	0.0595735	-0.0961901	0.750011	-0.242817	0.21459	0.0477621	0.862437	-0.104462	0.649272	-0.104034	0.677708	-0.0231579	0.900337	0.147355	0.432667	-0.101329	0.606729	0.0189054	0.974301	-0.124695	0.587896	0.0226645	0.958901	-0.054626	0.756373	0.180401	0.554132	-0.363465	0.271916	-0.22293	0.287625	-0.250939	0.271604
LOC689656		-0.30586	0.262764	-0.138589	0.550667	-0.206275	0.225222	0.154749	0.577042	0.121668	0.655084	-0.125459	0.569018	-0.502054	0.0201022	-0.429205	0.0595735	-0.0961901	0.750011	-0.242817	0.21459	0.0477621	0.862437	-0.104462	0.649272	-0.104034	0.677708	-0.0231579	0.900337	0.147355	0.432667	-0.101329	0.606729	0.0189054	0.974301	-0.124695	0.587896	0.0226645	0.958901	-0.054626	0.756373	0.180401	0.554132	-0.363465	0.271916	-0.22293	0.287625	-0.250939	0.271604
CDH20	cadherin 20 type 2	0.282489	0.284442	0.255022	0.371726	0.0844117	0.646668	-0.248118	0.192743	-0.0403853	0.875296	0.459794	0.0908699	0.0614343	0.781053	0.205149	0.453168	0.0390287	0.736463	-0.122047	0.662252	-0.0214737	0.933977	-0.0155524	0.902359	-0.190805	0.419451	-0.0123943	0.920861	0.0644207	0.644396	-0.134259	0.695303	0.0486884	0.720367	-0.030473	0.866166	-0.0448351	0.748286	0.162276	0.465016	0.177305	0.538418	-0.193588	0.482012	0.120737	0.609238	0.287147	0.127109
WNT2	wingless-type MMTV integration site family member 2	0.517314	0.0492433	0.296197	0.30055	0.252687	0.0865584	0.268665	0.209135	0.18719	0.053113	0.745846	0.0130256	0.465768	0.0476165	0.49979	0.0320847	0.198641	0.196519	0.218737	0.0916029	-0.166054	0.768986	-0.0861658	0.473224	0.438706	0.0695022	0.318754	0.115456	-0.265811	0.0136307	0.0695419	0.888486	-0.214226	0.410069	0.5656	0.0146695	0.388928	0.0472711	-0.0690874	0.588166	0.228531	0.228111	0.169571	0.419016	0.342391	0.0236559	0.212217	0.0713039
[truncated: 12 more columns]
