# Supplementary material for: Gene Expression Profiling of a Hypoxic Seizure Model of Epilepsy Suggests a Role for mTOR and Wnt Signaling in Epileptogenesis
Source: PLoS One. 2013 Sep 27;8(9):e74428. doi: 10.1371/journal.pone.0074428 (PMC3785482; doi:10.1371/journal.pone.0074428)
Supplement: File S5 — Table of expression ratios and P-values for the 261 genes in the membership matrix for the hypoxic seizure response. (XLS) [file pone.0074428.s007.xls]

## Sheet: .TSV]stream_data_to_app(1)
Membership matrix for the enriched gene sets (hypoxic seizure response) :
The 261 * 37 membership matrix for the 261 leading-edge genes in the 37 gene sets which scored significantly
against the 12 h differential response to hypoxic seizures in hippocampus, with additional filter requiring that
each gene appear in at least two gene sets, is displayed below (gray columns).
In addition, the 261 * 9 memberhip matrix for the genes in 9 functional categories condensed from the 37 gene sets is also shown (red columns).
Rows = genes.
Columns = gene sets (gray), condensed functional categories (red).
Cell values : 0 = no membership of gene in the corresponding gene set, 1 = gene is member of the corresponding gene set.
Additional columns :
SUM_genesets = total number of gene sets to which a gene belongs.
RatioHipp12h = ratio (hypoxic seizure / control)
SUM_condensed = total number of condensed functional categories to which a gene belongs.
flagANOVASelected = flag for genes also significantly scoring or hypoxic seizure/control effect in ANOVA.
		MEMBERSHIPS FOR INDIVIDUAL GENESETS																																					Total number of gene sets to which a gene belongs.	ratio (hypoxic seizure / control)	MEMBERSHIPS FOR CONDENSED FUCTIONAL CATEGORIES
#GENE	Description	ion_channels	autism_OMIM_jst_manual_curation_2010	PI3K-AKT_Signaling_Pathway_SA	epilepsy_E18_series4_4AP_8h_CRC_feb_2009	glutamatergic	synapse	epilepsy_E18_series4_BIC_8h_CRC_feb_2009	neuron_cahoy_emery_kaushal_2008	axonal_guidance	Insulin_Signaling_Pathway_SA	IGF_insulin_axis_JST	KEGG_WNT_SIGNALING_PATHWAY	BIOCARTA_NO1_PATHWAY	BIOCARTA_CTCF_PATHWAY	KEGG_LONG_TERM_DEPRESSION	BIOCARTA_CREB_PATHWAY	BILD_CTNNB1_ONCOGENIC_SIGNATURE	SIG_PIP3_SIGNALING_IN_CARDIAC_MYOCTES	REACTOME_TRANSMISSION_ACROSS_CHEMICAL_SYNAPSES	REACTOME_NEURORANSMITTER_RECEPTOR_BINDING_AND_DOWNSTREAM_TRANSMISSION_IN_THE_POSTSYNAPTIC_CELL	REACTOME_POST_NMDA_RECEPTOR_ACTIVATION_EVENTS	REACTOME_ACTIVATION_OF_NMDA_RECEPTOR_UPON_GLUTAMATE_BINDING_AND_POSTSYNAPTIC_EVENTS	ST_GRANULE_CELL_SURVIVAL_PATHWAY	RESPONSE_TO_HYPOXIA	GLUTAMATE_RECEPTOR_ACTIVITY	METABOTROPIC_GLUTAMATEGABA_B_LIKE_RECEPTOR_ACTIVITY	CYCLIC_NUCLEOTIDE_PHOSPHODIESTERASE_ACTIVITY	EGR2_mutations_in_inherited_neuropathies_dominant-negatively_inhibit_m_pubMED_11394999	Signal_transduction_pathways_that_regulate_eukaryotic_protein_synthesi_pubMED_10521405	Proteomic_analysis_of_NMDA_receptor-adhesion_protein_signaling_complex_pubMED_10862698	Regulation_of_translation_initiation_by_FRAP/mTOR._pubMED_11297505	Ribosomal_S6_kinase_signaling_and_the_control_of_translation._pubMED_10579915	Mechanism_and_function_of_signal_transduction_by_the_Wnt/beta-catenin__pubMED_10630639	Translation_initiation:_adept_at_adapting._pubMED_10500305	APC,_signal_transduction_and_genetic_instability_in_colorectal_cancer._pubMED_11900252	The_subcellular_destinations_of_APC_proteins._pubMED_11988767	Protein_trafficking_and_anchoring_complexes_revealed_by_proteomic_anal_pubMED_15024025	SUM_genesets	RatioHipp12h	Wnt_signaling	IGF1_PI3K_mTOR	glutamatergic_NMDAR_II	Synaptic	In_vitro_response_BIC_4AP	Autism_associated	Axonal_guidance	glutamatergic_NMDAR_I	Hypoxia_response
MAPK1	mitogen-activated protein kinase 1	0	0	1	0	0	0	0	0	0	1	0	0	0	0	1	1	0	0	1	1	1	1	1	0	0	0	0	0	1	1	0	1	0	1	0	0	0	13	1.27191	0	1	1	0	0	0	0	1	0
RPS6KA1	ribosomal protein S6 kinase 90kDa polypeptide 1	0	0	1	0	0	0	0	0	0	1	0	0	0	0	0	1	0	1	1	1	1	1	0	0	0	0	0	0	0	1	1	1	0	0	0	0	0	11	1.36415	0	1	1	0	0	0	0	0	0
GRIN2A	glutamate receptor ionotropic N-methyl D-aspartate 2A	1	0	0	0	1	0	0	0	0	0	0	0	0	0	0	0	0	0	1	1	1	1	0	0	1	0	0	1	0	1	0	0	0	0	0	0	0	9	1.43893	0	0	1	1	0	0	0	1	0
GRIA2	glutamate receptor ionotropic AMPA 2	1	0	0	0	1	0	0	0	0	0	0	0	0	0	1	0	0	0	1	1	0	1	0	0	1	0	0	1	0	0	0	0	0	0	0	0	0	8	1.75808	0	0	1	1	0	0	0	1	0
GSK3B	glycogen synthase kinase 3 beta	0	0	1	0	0	0	0	0	0	1	0	1	0	0	0	0	0	1	0	0	0	0	0	0	0	0	0	0	1	0	0	0	1	0	1	1	0	8	1.71475	1	1	0	0	0	0	0	0	0
PDPK1	3-phosphoinositide dependent protein kinase-1	0	0	1	0	0	0	0	0	0	1	0	0	0	0	0	0	0	0	1	1	1	1	0	0	0	0	0	0	0	0	1	1	0	0	0	0	0	8	1.19251	0	1	1	0	0	0	0	0	0
CAMK2B	calcium/calmodulin-dependent protein kinase (CaM kinase) II beta	0	0	0	0	0	0	0	1	0	0	0	1	0	0	0	1	0	0	1	1	1	1	0	0	0	0	0	0	0	1	0	0	0	0	0	0	0	8	1.25006	1	0	1	0	0	0	0	0	0
GRIA1	glutamate receptor ionotropic AMPA 1	1	0	0	0	1	0	0	0	0	0	0	0	0	0	1	0	0	0	1	1	0	1	0	0	1	0	0	0	0	0	0	0	0	0	0	0	0	7	1.70882	0	0	1	1	0	0	0	1	0
CTNNB1	catenin (cadherin-associated protein) beta 1 88kDa	0	0	1	0	0	1	0	0	0	0	0	1	0	0	0	0	0	0	0	0	0	0	0	0	0	0	0	0	0	1	0	0	1	0	1	1	0	7	2.32947	1	1	1	1	0	0	0	0	0
RPS6KB1	ribosomal protein S6 kinase 70kDa polypeptide 1	0	0	1	0	0	0	0	0	0	1	0	0	0	1	0	0	0	1	0	0	0	0	0	0	0	0	0	0	1	0	1	1	0	0	0	0	0	7	1.47631	0	1	0	0	0	0	0	0	0
PRKCA	protein kinase C alpha	0	0	1	1	0	0	1	0	0	0	0	1	0	0	1	0	0	0	1	1	0	0	0	0	0	0	0	0	0	0	0	0	0	0	0	0	0	7	1.13367	1	1	1	0	1	0	0	1	0
CAMK4	calcium/calmodulin-dependent protein kinase IV	0	0	0	0	0	0	0	1	0	0	0	0	0	0	0	0	0	0	1	1	1	1	0	0	0	0	0	1	1	0	0	0	0	0	0	0	0	7	1.68063	0	1	1	0	0	0	0	0	0
PRKACB	protein kinase cAMP-dependent catalytic beta	0	0	0	0	0	0	0	0	0	0	0	1	1	0	0	1	0	0	1	1	1	1	0	0	0	0	0	0	0	0	0	0	0	0	0	0	0	7	2.26577	1	0	1	0	0	0	0	0	0
CALM3	calmodulin 3 (phosphorylase kinase delta)	0	0	0	0	0	0	0	0	0	0	0	0	1	0	0	0	0	0	1	1	1	1	0	0	0	0	0	0	1	1	0	0	0	0	0	0	0	7	1.26138	0	1	1	0	0	0	0	0	0
CREB1	cAMP responsive element binding protein 1	0	0	0	0	0	0	0	0	0	0	0	0	0	0	0	1	0	1	1	1	1	1	1	0	0	0	0	0	0	0	0	0	0	0	0	0	0	7	1.55725	0	1	1	0	0	0	0	0	0
RPS6KA2	ribosomal protein S6 kinase 90kDa polypeptide 2	0	0	0	0	0	0	0	0	0	0	0	0	0	0	0	0	0	1	1	1	1	1	0	0	0	0	0	0	1	1	0	0	0	0	0	0	0	7	1.38607	0	1	1	0	0	0	0	0	0
GRIA3	glutamate receptor ionotrophic AMPA 3	1	0	0	0	1	0	0	0	0	0	0	0	0	0	1	0	0	0	1	1	0	1	0	0	0	0	0	0	0	0	0	0	0	0	0	0	0	6	2.09943	0	0	1	1	0	0	0	1	0
GRIN2B	glutamate receptor ionotropic N-methyl D-aspartate 2B	1	0	0	0	0	0	0	0	0	0	0	0	0	0	0	0	0	0	1	1	1	1	0	0	0	0	0	0	0	1	0	0	0	0	0	0	0	6	1.13682	0	0	1	1	0	0	0	1	0
GRIN1	glutamate receptor ionotropic N-methyl D-aspartate 1	1	0	0	0	0	0	0	0	0	0	0	0	0	0	0	0	0	0	1	1	1	1	0	0	0	0	0	0	0	1	0	0	0	0	0	0	0	6	1.1274	0	0	1	1	0	0	0	1	0
APC	adenomatosis polyposis coli	0	0	1	0	0	0	0	0	0	0	0	1	0	0	0	0	0	0	0	0	0	0	1	0	0	0	0	0	0	0	0	0	1	0	1	1	0	6	1.2861	1	1	0	0	0	0	0	0	0
AKT2	v-akt murine thymoma viral oncogene homolog 2	0	0	1	0	0	0	0	0	0	1	0	0	0	0	0	0	0	1	0	0	0	0	0	0	0	0	0	0	1	0	1	1	0	0	0	0	0	6	1.24401	0	1	0	0	0	0	0	0	0
AKT3	v-akt murine thymoma viral oncogene homolog 3 (protein kinase B gamma)	0	0	1	0	0	0	0	0	0	1	0	0	0	0	0	0	0	1	0	0	0	0	0	0	0	0	0	0	1	0	1	1	0	0	0	0	0	6	1.21083	0	1	0	0	0	0	0	0	0
RASGRF1	Ras protein-specific guanine nucleotide-releasing factor 1	0	0	0	0	0	0	0	1	0	0	0	0	0	0	0	0	0	0	1	1	1	1	0	0	0	0	0	0	1	0	0	0	0	0	0	0	0	6	1.55401	0	1	1	0	0	0	0	0	0
CAMK2D	Calcium/calmodulin-dependent protein kinase (CaM kinase) II delta	0	0	0	0	0	0	0	0	0	0	0	1	0	0	0	1	0	0	1	1	1	1	0	0	0	0	0	0	0	0	0	0	0	0	0	0	0	6	1.54971	1	0	1	0	0	0	0	0	0
CAMK2G	calcium/calmodulin-dependent protein kinase (CaM kinase) II gamma	0	0	0	0	0	0	0	0	0	0	0	1	0	0	0	1	0	0	1	1	1	1	0	0	0	0	0	0	0	0	0	0	0	0	0	0	0	6	1.42603	1	0	1	0	0	0	0	0	0
GRIA4	glutamate receptor ionotrophic AMPA 4	1	0	0	0	1	0	0	0	0	0	0	0	0	0	0	0	0	0	1	1	0	1	0	0	0	0	0	0	0	0	0	0	0	0	0	0	0	5	1.6449	0	0	1	1	0	0	0	1	0
GRIK5	glutamate receptor ionotropic kainate 5	1	0	0	0	1	0	0	0	0	0	0	0	0	0	0	0	0	0	1	1	0	0	0	0	1	0	0	0	0	0	0	0	0	0	0	0	0	5	1.42306	0	0	1	1	0	0	0	1	0
PIK3R1	phosphoinositide-3-kinase regulatory subunit 1 (p85 alpha)	0	0	1	0	0	0	0	0	0	1	0	0	0	1	0	1	0	0	0	0	0	0	0	0	0	0	0	0	0	0	0	1	0	0	0	0	0	5	1.82387	0	1	1	0	0	0	0	0	0
IRS1	insulin receptor substrate 1	0	0	1	0	0	0	0	0	0	1	1	0	0	0	0	0	0	1	0	0	0	0	0	0	0	0	0	0	1	0	0	0	0	0	0	0	0	5	1.78509	0	1	0	0	0	0	0	0	0
PIK3CA	phosphoinositide-3-kinase catalytic alpha polypeptide	0	0	1	0	0	0	0	0	0	1	0	0	0	1	0	1	0	1	0	0	0	0	0	0	0	0	0	0	0	0	0	0	0	0	0	0	0	5	1.40542	0	1	1	0	0	0	0	0	0
EIF4E	eukaryotic translation initiation factor 4E	0	0	1	0	0	0	0	0	0	1	0	0	0	0	0	0	0	0	0	0	0	0	0	0	0	0	0	0	1	0	1	0	0	1	0	0	0	5	1.21926	0	1	0	0	0	0	0	0	0
HOMER1	homer homolog 1 (Drosophila)	0	0	0	1	1	1	1	0	0	0	0	0	0	0	0	0	0	0	0	0	0	0	0	0	0	0	0	0	0	1	0	0	0	0	0	0	0	5	1.54864	0	0	1	1	1	0	0	1	0
SLC1A3	solute carrier family 1 (glial high affinity glutamate transporter) member 3	0	0	0	0	1	1	1	0	0	0	0	0	0	0	0	0	0	0	1	0	0	0	0	0	0	0	0	1	0	0	0	0	0	0	0	0	0	5	1.47939	0	0	1	1	1	0	0	1	0
GRM1	glutamate receptor metabotropic 1	0	0	0	0	1	0	0	0	0	0	0	0	0	0	1	0	0	0	0	0	0	0	0	0	1	1	0	0	0	1	0	0	0	0	0	0	0	5	1.47734	0	0	1	0	0	0	0	1	0
PPP2R1A	protein phosphatase 2 (formerly 2A) regulatory subunit A (PR 65) alpha isoform	0	0	0	0	0	0	0	0	0	0	0	1	0	0	1	0	0	0	0	0	0	0	0	0	0	0	0	0	0	1	1	1	0	0	0	0	0	5	1.87384	1	1	1	0	0	0	0	1	0
MYC	v-myc myelocytomatosis viral oncogene homolog (avian)	0	0	0	0	0	0	0	0	0	0	0	1	0	1	0	0	0	1	0	0	0	0	0	0	0	0	0	0	1	0	0	0	1	0	0	0	0	5	1.62789	1	1	0	0	0	0	0	0	0
CALM2	calmodulin 2 (phosphorylase kinase delta)	0	0	0	0	0	0	0	0	0	0	0	0	0	0	0	0	0	0	1	1	1	1	0	0	0	0	0	0	0	1	0	0	0	0	0	0	0	5	1.1607	0	1	1	0	0	0	0	0	0
CACNA1A	calcium channel voltage-dependent P/Q type alpha 1A subunit	1	0	0	0	0	1	0	0	0	0	0	0	0	0	1	0	0	0	1	0	0	0	0	0	0	0	0	0	0	0	0	0	0	0	0	0	0	4	1.49381	0	0	1	1	0	0	0	1	0
CACNG4	calcium channel voltage-dependent gamma subunit 4	1	0	0	0	0	1	0	0	0	0	0	0	0	0	0	0	0	0	1	1	0	0	0	0	0	0	0	0	0	0	0	0	0	0	0	0	0	4	1.21251	0	0	1	1	0	0	0	0	0
CACNG8	calcium channel voltage-dependent gamma subunit 8	1	0	0	0	0	1	0	0	0	0	0	0	0	0	0	0	0	0	1	1	0	0	0	0	0	0	0	0	0	0	0	0	0	0	0	0	0	4	1.15349	0	0	1	1	0	0	0	0	0
SYNGAP1	synaptic Ras GTPase activating protein 1 homolog (rat)	0	1	0	1	0	0	1	0	0	0	0	0	0	0	0	0	0	0	0	0	0	0	0	0	0	0	0	0	0	1	0	0	0	0	0	0	0	4	1.35754	0	0	1	0	1	1	0	0	0
WNT2	wingless-type MMTV integration site family member 2	0	1	0	1	0	0	1	0	0	0	0	1	0	0	0	0	0	0	0	0	0	0	0	0	0	0	0	0	0	0	0	0	0	0	0	0	0	4	1.19168	1	0	0	0	1	1	0	0	0
RAC1	ras-related C3 botulinum toxin substrate 1 (rho family small GTP binding protei	0	0	1	0	0	0	0	0	0	0	0	1	0	0	0	1	0	0	0	0	0	0	0	0	0	0	0	0	0	1	0	0	0	0	0	0	0	4	1.85575	1	1	1	0	0	0	0	0	0
PTPN11	protein tyrosine phosphatase non-receptor type 11 (Noonan syndrome 1)	0	0	1	0	0	0	0	0	0	1	0	0	0	0	0	0	0	0	0	0	0	0	0	0	0	0	0	0	1	1	0	0	0	0	0	0	0	4	1.51572	0	1	1	0	0	0	0	0	0
EIF4G1	eukaryotic translation initiation factor 4 gamma 1	0	0	1	0	0	0	0	0	0	0	0	0	0	0	0	0	0	0	0	0	0	0	0	0	0	0	0	0	1	0	1	0	0	1	0	0	0	4	1.35849	0	1	0	0	0	0	0	0	0
IGF1R	Insulin-like growth factor 1 receptor	0	0	1	0	0	0	0	0	0	1	1	0	0	0	1	0	0	0	0	0	0	0	0	0	0	0	0	0	0	0	0	0	0	0	0	0	0	4	1.31768	0	1	0	0	1	0	0	1	0
PRKCB1	Protein kinase C beta 1	0	0	1	0	0	0	0	0	0	1	0	0	0	0	0	0	0	0	0	0	0	0	0	0	0	0	0	0	1	1	0	0	0	0	0	0	0	4	1.30495	0	1	1	0	0	0	0	0	0
GRB2	growth factor receptor-bound protein 2	0	0	1	0	0	0	0	0	0	1	0	0	0	0	0	1	0	1	0	0	0	0	0	0	0	0	0	0	0	0	0	0	0	0	0	0	0	4	1.20664	0	1	1	0	0	0	0	0	0
IGF1	insulin-like growth factor 1 (somatomedin C)	0	0	1	0	0	0	0	0	0	0	1	0	0	0	1	0	0	1	0	0	0	0	0	0	0	0	0	0	0	0	0	0	0	0	0	0	0	4	1.13288	0	1	0	0	0	0	0	1	0
SEMA3A	sema domain immunoglobulin domain (Ig) short basic domain secreted (semaphor	0	0	0	1	0	0	1	1	1	0	0	0	0	0	0	0	0	0	0	0	0	0	0	0	0	0	0	0	0	0	0	0	0	0	0	0	0	4	1.49278	0	0	0	0	1	0	1	0	0
LIN7A	lin-7 homolog A (C. elegans)	0	0	0	1	0	1	1	0	0	0	0	0	0	0	0	0	0	0	0	0	0	0	0	0	0	0	0	0	0	0	0	0	0	0	0	0	1	4	1.25006	0	0	0	1	1	0	0	0	0
GRM2	glutamate receptor metabotropic 2	0	0	0	0	1	0	1	0	0	0	0	0	0	0	0	0	0	0	0	0	0	0	0	0	1	1	0	0	0	0	0	0	0	0	0	0	0	4	1.65061	0	0	0	0	1	0	0	1	0
GRM7	glutamate receptor metabotropic 7	0	0	0	0	1	0	0	1	0	0	0	0	0	0	0	0	0	0	0	0	0	0	0	0	1	1	0	0	0	0	0	0	0	0	0	0	0	4	1.51047	0	0	0	0	0	0	0	1	0
GRIP1	glutamate receptor interacting protein 1	0	0	0	0	1	1	0	0	0	0	0	0	0	0	0	0	0	0	1	1	0	0	0	0	0	0	0	0	0	0	0	0	0	0	0	0	0	4	1.38415	0	0	1	1	0	0	0	1	0
GRM5	glutamate receptor metabotropic 5	0	0	0	0	1	0	0	0	0	0	0	0	0	0	1	0	0	0	0	0	0	0	0	0	1	1	0	0	0	0	0	0	0	0	0	0	0	4	1.21588	0	0	0	0	0	0	0	1	0
DVL3	dishevelled dsh homolog 3 (Drosophila)	0	0	0	0	0	0	1	0	0	0	0	1	0	0	0	0	0	0	0	0	0	0	0	0	0	0	0	0	0	0	0	0	1	0	1	0	0	4	1.63127	1	0	0	0	1	0	0	0	0
WNT10A	wingless-type MMTV integration site family member 10A	0	0	0	0	0	0	0	0	0	0	0	1	0	0	0	0	0	0	0	0	0	0	0	0	0	0	0	0	0	0	0	0	1	0	1	1	0	4	1.3435	1	0	0	0	0	0	0	0	0
PLCB1	phospholipase C beta 1 (phosphoinositide-specific)	0	0	0	0	0	0	0	0	0	0	0	1	0	0	1	0	0	0	1	1	0	0	0	0	0	0	0	0	0	0	0	0	0	0	0	0	0	4	1.11884	1	0	1	0	0	0	0	1	0
RASGRF2	Ras protein-specific guanine nucleotide-releasing factor 2	0	0	0	0	0	0	0	0	0	0	0	0	0	0	0	0	0	0	1	1	1	1	0	0	0	0	0	0	0	0	0	0	0	0	0	0	0	4	1.17121	0	0	1	0	0	0	0	0	0
GJA1	gap junction protein alpha 1 43kDa (connexin 43)	1	0	1	0	0	0	0	0	0	0	0	0	0	0	0	0	0	0	0	0	0	0	0	0	0	0	0	0	0	0	0	0	1	0	0	0	0	3	1.88818	1	1	0	1	0	0	0	0	0
GABRA4	gamma-aminobutyric acid (GABA) A receptor alpha 4	1	1	0	1	0	0	0	0	0	0	0	0	0	0	0	0	0	0	0	0	0	0	0	0	0	0	0	0	0	0	0	0	0	0	0	0	0	3	1.77645	0	0	0	1	1	1	0	0	0
CACNB4	calcium channel voltage-dependent beta 4 subunit	1	0	0	0	0	1	0	0	0	0	0	0	0	0	0	0	0	0	1	0	0	0	0	0	0	0	0	0	0	0	0	0	0	0	0	0	0	3	1.61776	0	0	1	1	0	0	0	0	0
RYR2	ryanodine receptor 2 (cardiac)	1	0	0	0	0	0	0	1	0	0	0	0	1	0	0	0	0	0	0	0	0	0	0	0	0	0	0	0	0	0	0	0	0	0	0	0	0	3	1.61105	0	0	0	1	0	0	0	0	0
CACNA2D3	calcium channel voltage-dependent alpha 2/delta 3 subunit	1	0	0	0	0	0	0	1	0	0	0	0	0	0	0	0	0	0	1	0	0	0	0	0	0	0	0	0	0	0	0	0	0	0	0	0	0	3	1.55186	0	0	1	1	0	0	0	0	0
CACNA1C	calcium channel voltage-dependent L type alpha 1C subunit	1	1	0	0	0	1	0	0	0	0	0	0	0	0	0	0	0	0	0	0	0	0	0	0	0	0	0	0	0	0	0	0	0	0	0	0	0	3	1.40542	0	0	0	1	0	1	0	0	0
GRID2	glutamate receptor ionotropic delta 2	1	0	0	0	1	0	0	0	0	0	0	0	0	0	1	0	0	0	0	0	0	0	0	0	0	0	0	0	0	0	0	0	0	0	0	0	0	3	1.24487	0	0	0	1	0	0	0	1	0
CACNA1E	calcium channel voltage-dependent alpha 1E subunit	1	0	0	0	0	1	0	0	0	0	0	0	0	0	0	0	0	0	1	0	0	0	0	0	0	0	0	0	0	0	0	0	0	0	0	0	0	3	1.21251	0	0	1	1	0	0	0	0	0
KCNJ3	potassium inwardly-rectifying channel subfamily J member 3	1	0	0	1	0	0	1	0	0	0	0	0	0	0	0	0	0	0	0	0	0	0	0	0	0	0	0	0	0	0	0	0	0	0	0	0	0	3	1.17121	0	0	0	1	1	0	0	0	0
CACNA1B	calcium channel voltage-dependent L type alpha 1B subunit	1	0	0	0	0	1	0	0	0	0	0	0	0	0	0	0	0	0	1	0	0	0	0	0	0	0	0	0	0	0	0	0	0	0	0	0	0	3	1.16393	0	0	1	1	0	0	0	0	0
CACNA1D	calcium channel voltage-dependent L type alpha 1D subunit	1	1	0	0	0	1	0	0	0	0	0	0	0	0	0	0	0	0	0	0	0	0	0	0	0	0	0	0	0	0	0	0	0	0	0	0	0	3	1.1088	0	0	0	1	0	1	0	0	0
MET	met proto-oncogene (hepatocyte growth factor receptor)	0	1	0	0	0	0	0	0	1	0	0	0	0	0	0	0	0	1	0	0	0	0	0	0	0	0	0	0	0	0	0	0	0	0	0	0	0	3	1.32685	0	1	0	0	0	1	1	0	0
TSC1	tuberous sclerosis 1	0	1	1	0	0	0	0	0	0	0	0	0	0	0	0	0	0	1	0	0	0	0	0	0	0	0	0	0	0	0	0	0	0	0	0	0	0	3	1.29954	0	1	0	0	0	1	0	0	0
EIF4A1	eukaryotic translation initiation factor 4A isoform 1	0	0	1	0	0	0	0	0	0	0	0	0	0	0	0	0	0	0	0	0	0	0	0	0	0	0	0	0	0	0	1	0	0	1	0	0	0	3	1.61217	0	1	0	0	0	0	0	0	0
CDKN1B	cyclin-dependent kinase inhibitor 1B (p27 Kip1)	0	0	1	0	0	0	0	0	0	0	0	0	0	1	0	0	0	1	0	0	0	0	0	0	0	0	0	0	0	0	0	0	0	0	0	0	0	3	1.35097	0	1	0	0	0	0	0	0	0
CCND1	cyclin D1	0	0	1	0	0	0	0	0	0	0	0	1	0	0	0	0	0	0	0	0	0	0	0	0	0	0	0	0	0	0	0	0	1	0	0	0	0	3	1.23799	1	1	0	0	0	0	0	0	0
MAPK8	mitogen-activated protein kinase 8	0	0	1	0	0	0	0	0	0	0	0	1	0	0	0	0	0	0	0	0	0	0	1	0	0	0	0	0	0	0	0	0	0	0	0	0	0	3	1.19416	1	1	0	0	0	0	0	0	0
GNB1	guanine nucleotide binding protein (G protein) beta polypeptide 1	0	0	1	0	0	0	0	0	0	0	0	0	0	0	0	0	0	0	1	1	0	0	0	0	0	0	0	0	0	0	0	0	0	0	0	0	0	3	1.17365	0	1	1	0	0	0	0	0	0
LEF1	lymphoid enhancer-binding factor 1	0	0	1	0	0	0	1	0	0	0	0	1	0	0	0	0	0	0	0	0	0	0	0	0	0	0	0	0	0	0	0	0	0	0	0	0	0	3	1.15589	1	1	0	0	1	0	0	0	0
SOS1	son of sevenless homolog 1 (Drosophila)	0	0	1	0	0	0	0	0	0	1	0	0	0	0	0	0	0	1	0	0	0	0	0	0	0	0	0	0	0	0	0	0	0	0	0	0	0	3	1.07549	0	1	1	0	0	0	0	0	0
FOS	v-fos FBJ murine osteosarcoma viral oncogene homolog	0	0	1	0	0	0	0	0	0	1	0	0	0	0	0	0	0	0	0	0	0	0	1	0	0	0	0	0	0	0	0	0	0	0	0	0	0	3	1.0697	0	1	0	0	0	0	0	0	0
EPRS	glutamyl-prolyl-tRNA synthetase	0	0	0	1	0	0	1	0	0	0	0	0	0	0	0	0	1	0	0	0	0	0	0	0	0	0	0	0	0	0	0	0	0	0	0	0	0	3	1.47223	1	0	0	0	1	0	0	0	0
PRKG2	protein kinase cGMP-dependent type II	0	0	0	1	0	0	0	0	0	0	0	0	1	0	1	0	0	0	0	0	0	0	0	0	0	0	0	0	0	0	0	0	0	0	0	0	0	3	1.41519	0	0	0	0	1	0	0	1	0
SLC7A8	solute carrier family 7 (cationic amino acid transporter y+ system) member 8	0	0	0	1	0	0	1	1	0	0	0	0	0	0	0	0	0	0	0	0	0	0	0	0	0	0	0	0	0	0	0	0	0	0	0	0	0	3	1.35754	0	0	0	0	1	0	0	0	0
ROCK2	Rho-associated coiled-coil containing protein kinase 2	0	0	0	1	0	0	1	0	0	0	0	1	0	0	0	0	0	0	0	0	0	0	0	0	0	0	0	0	0	0	0	0	0	0	0	0	0	3	1.19003	1	0	0	0	1	0	0	0	0
GRM8	glutamate receptor metabotropic 8	0	0	0	0	1	0	0	0	0	0	0	0	0	0	0	0	0	0	0	0	0	0	0	0	1	1	0	0	0	0	0	0	0	0	0	0	0	3	1.4651	0	0	0	0	0	0	0	1	0
SLC1A2	solute carrier family 1 (glial high affinity glutamate transporter) member 2	0	0	0	0	1	1	0	0	0	0	0	0	0	0	0	0	0	0	1	0	0	0	0	0	0	0	0	0	0	0	0	0	0	0	0	0	0	3	1.39571	0	0	1	1	0	0	0	1	0
SLC1A1	solute carrier family 1 (neuronal/epithelial high affinity glutamate transporter	0	0	0	0	1	1	0	0	0	0	0	0	0	0	0	0	0	0	1	0	0	0	0	0	0	0	0	0	0	0	0	0	0	0	0	0	0	3	1.24315	0	0	1	1	0	0	0	1	0
GRM6	glutamate receptor metabotropic 6	0	0	0	0	1	0	0	0	0	0	0	0	0	0	0	0	0	0	0	0	0	0	0	0	1	1	0	0	0	0	0	0	0	0	0	0	0	3	1.22603	0	0	0	0	0	0	0	1	0
CDH2	cadherin 2 type 1 N-cadherin (neuronal)	0	0	0	0	0	1	0	0	0	0	0	0	0	0	0	0	0	0	0	0	0	0	0	0	0	0	0	0	0	1	0	0	0	0	0	1	0	3	1.41814	1	0	1	1	0	0	0	0	0
PDE7A	phosphodiesterase 7A	0	0	0	0	0	0	1	0	0	0	0	0	0	0	0	0	0	0	0	0	0	0	0	0	0	0	1	1	0	0	0	0	0	0	0	0	0	3	1.34443	0	0	0	0	1	0	0	0	0
EPHA3	EPH receptor A3	0	0	0	0	0	0	1	1	1	0	0	0	0	0	0	0	0	0	0	0	0	0	0	0	0	0	0	0	0	0	0	0	0	0	0	0	0	3	1.28165	0	0	0	0	1	0	1	0	0
PRKAR2A	protein kinase cAMP-dependent regulatory type II alpha	0	0	0	0	0	0	1	0	0	0	0	0	1	0	0	1	0	0	0	0	0	0	0	0	0	0	0	0	0	0	0	0	0	0	0	0	0	3	1.25527	0	0	1	0	1	0	0	0	0
PRKCI	protein kinase C iota	0	0	0	0	0	0	0	0	0	1	0	0	0	0	0	0	0	0	0	0	0	0	0	0	0	0	0	0	1	0	0	1	0	0	0	0	0	3	1.62563	0	1	0	0	0	0	0	0	0
INSR	insulin receptor	0	0	0	0	0	0	0	0	0	1	1	0	0	0	0	0	0	0	0	0	0	0	0	0	0	0	0	0	1	0	0	0	0	0	0	0	0	3	1.43396	0	1	0	0	0	0	0	0	0
AXIN2	axin 2 (conductin axil)	0	0	0	0	0	0	0	0	0	0	0	1	0	0	0	0	1	0	0	0	0	0	0	0	0	0	0	0	0	0	0	0	0	0	1	0	0	3	1.48247	1	0	0	0	0	0	0	0	0
CREBBP	CREB binding protein (Rubinstein-Taybi syndrome)	0	0	0	0	0	0	0	0	0	0	0	1	0	0	0	0	0	0	0	0	0	0	0	1	0	0	0	0	0	0	0	0	1	0	0	0	0	3	1.40153	1	0	0	0	0	0	0	0	1
TGFBR3	transforming growth factor beta receptor III (betaglycan 300kDa)	0	0	0	0	0	0	0	0	0	0	0	0	0	1	0	0	0	0	0	0	0	0	0	0	0	0	0	1	0	0	0	0	0	0	1	0	0	3	1.69584	1	0	0	0	0	0	0	0	0
MDM2	Mdm2 transformed 3T3 cell double minute 2 p53 binding protein (mouse)	0	0	0	0	0	0	0	0	0	0	0	0	0	1	0	0	0	0	1	1	0	0	0	0	0	0	0	0	0	0	0	0	0	0	0	0	0	3	1.48865	0	0	1	0	0	0	0	0	0
PRKCD	protein kinase C delta	0	0	0	0	0	0	0	0	0	0	0	0	0	0	0	0	0	0	0	0	0	0	0	0	0	0	0	1	1	0	0	1	0	0	0	0	0	3	1.26225	0	1	0	0	0	0	0	0	0
EIF4EBP2	Eukaryotic translation initiation factor 4E binding protein 2	0	0	0	0	0	0	0	0	0	0	0	0	0	0	0	0	0	0	0	0	0	0	0	0	0	0	0	0	1	0	1	0	0	1	0	0	0	3	1.39185	0	1	0	0	0	0	0	0	0
GRIN3A	glutamate receptor ionotropic N-methyl-D-aspartate 3A	1	0	0	0	1	0	0	0	0	0	0	0	0	0	0	0	0	0	0	0	0	0	0	0	0	0	0	0	0	0	0	0	0	0	0	0	0	2	2.09943	0	0	0	1	0	0	0	1	0
CHRNA1	cholinergic receptor nicotinic alpha 1 (muscle)	1	0	0	0	0	0	0	0	0	0	0	0	1	0	0	0	0	0	0	0	0	0	0	0	0	0	0	0	0	0	0	0	0	0	0	0	0	2	1.89474	0	0	0	1	0	0	0	0	0
KCNC2	Potassium voltage-gated channel Shaw-related subfamily member 2	1	0	0	0	0	0	0	1	0	0	0	0	0	0	0	0	0	0	0	0	0	0	0	0	0	0	0	0	0	0	0	0	0	0	0	0	0	2	1.70409	0	0	0	1	0	0	0	0	0
KCNIP4	Kv channel interacting protein 4	1	0	0	0	0	0	0	1	0	0	0	0	0	0	0	0	0	0	0	0	0	0	0	0	0	0	0	0	0	0	0	0	0	0	0	0	0	2	1.67481	0	0	0	1	0	0	0	0	0
KCNQ5	potassium voltage-gated channel KQT-like subfamily member 5	1	0	0	0	0	0	0	1	0	0	0	0	0	0	0	0	0	0	0	0	0	0	0	0	0	0	0	0	0	0	0	0	0	0	0	0	0	2	1.55294	0	0	0	1	0	0	0	0	0
GLRA2	glycine receptor alpha 2	1	0	0	0	0	0	0	1	0	0	0	0	0	0	0	0	0	0	0	0	0	0	0	0	0	0	0	0	0	0	0	0	0	0	0	0	0	2	1.45297	0	0	0	1	0	0	0	0	0
CACNG6	calcium channel voltage-dependent gamma subunit 6	1	0	0	0	0	1	0	0	0	0	0	0	0	0	0	0	0	0	0	0	0	0	0	0	0	0	0	0	0	0	0	0	0	0	0	0	0	2	1.36509	0	0	0	1	0	0	0	0	0
CACNA2D1	calcium channel voltage-dependent alpha 2/delta subunit 1	1	0	0	0	0	0	0	0	0	0	0	0	0	0	0	0	0	0	1	0	0	0	0	0	0	0	0	0	0	0	0	0	0	0	0	0	0	2	1.33793	0	0	1	1	0	0	0	0	0
SCN1A	sodium channel voltage-gated type I alpha	1	0	0	0	0	0	0	1	0	0	0	0	0	0	0	0	0	0	0	0	0	0	0	0	0	0	0	0	0	0	0	0	0	0	0	0	0	2	1.30858	0	0	0	1	0	0	0	0	0
KCNJ10	potassium inwardly-rectifying channel subfamily J member 10	1	0	0	0	0	0	0	0	0	0	0	0	0	0	0	0	0	0	0	0	0	0	0	0	0	0	0	0	0	0	0	0	0	0	0	0	1	2	1.30858	0	0	0	1	0	0	0	0	0
KCNJ2	potassium inwardly-rectifying channel subfamily J member 2	1	0	0	0	0	0	0	0	0	0	0	0	0	0	0	0	0	0	0	0	0	0	0	0	0	0	0	0	0	0	0	0	0	0	0	0	1	2	1.30767	0	0	0	1	0	0	0	0	0
KCNJ4	potassium inwardly-rectifying channel subfamily J member 4	1	0	0	0	0	0	0	0	0	0	0	0	0	0	0	0	0	0	0	0	0	0	0	0	0	0	0	0	0	0	0	0	0	0	0	0	1	2	1.29146	0	0	0	1	0	0	0	0	0
CACNG7	calcium channel voltage-dependent gamma subunit 7	1	0	0	0	0	1	0	0	0	0	0	0	0	0	0	0	0	0	0	0	0	0	0	0	0	0	0	0	0	0	0	0	0	0	0	0	0	2	1.25963	0	0	0	1	0	0	0	0	0
SCN3A	sodium channel voltage-gated type III alpha	1	0	0	0	0	0	0	1	0	0	0	0	0	0	0	0	0	0	0	0	0	0	0	0	0	0	0	0	0	0	0	0	0	0	0	0	0	2	1.2492	0	0	0	1	0	0	0	0	0
ITPR2	inositol 1 4 5-triphosphate receptor type 2	1	0	0	0	0	0	0	0	0	0	0	0	0	0	1	0	0	0	0	0	0	0	0	0	0	0	0	0	0	0	0	0	0	0	0	0	0	2	1.21926	0	0	0	1	0	0	0	1	0
CHRNA4	cholinergic receptor nicotinic alpha 4	1	0	0	0	0	0	0	0	0	0	0	0	0	0	0	0	0	0	0	0	0	0	0	1	0	0	0	0	0	0	0	0	0	0	0	0	0	2	1.1487	0	0	0	1	1	0	0	0	1
CACNA1G	calcium channel voltage-dependent alpha 1G subunit	1	0	0	0	0	1	0	0	0	0	0	0	0	0	0	0	0	0	0	0	0	0	0	0	0	0	0	0	0	0	0	0	0	0	0	0	0	2	1.12896	0	0	0	1	0	0	0	0	0
CACNA1S	calcium channel voltage-dependent L type alpha 1S subunit	1	0	0	0	0	1	0	0	0	0	0	0	0	0	0	0	0	0	0	0	0	0	0	0	0	0	0	0	0	0	0	0	0	0	0	0	0	2	1.12272	0	0	0	1	0	0	0	0	0
NLGN3	neuroligin 3	0	1	0	0	0	1	0	0	0	0	0	0	0	0	0	0	0	0	0	0	0	0	0	0	0	0	0	0	0	0	0	0	0	0	0	0	0	2	1.9	0	0	0	1	0	1	0	0	0
SLC6A4	solute carrier family 6 (neurotransmitter transporter serotonin) member 4	0	1	0	0	0	1	0	0	0	0	0	0	0	0	0	0	0	0	0	0	0	0	0	0	0	0	0	0	0	0	0	0	0	0	0	0	0	2	1.79876	0	0	0	1	0	1	0	0	0
MAOA	monoamine oxidase A	0	1	0	0	0	0	0	0	0	0	0	0	0	0	0	0	0	0	1	0	0	0	0	0	0	0	0	0	0	0	0	0	0	0	0	0	0	2	1.33515	0	0	1	0	0	1	0	0	0
NRXN1	neurexin 1	0	1	0	0	0	1	0	0	0	0	0	0	0	0	0	0	0	0	0	0	0	0	0	0	0	0	0	0	0	0	0	0	0	0	0	0	0	2	1.11729	0	0	0	1	0	1	0	0	0
ASAH1	N-acylsphingosine amidohydrolase (acid ceramidase) 1	0	0	1	0	0	0	0	0	0	0	0	0	0	0	0	0	0	0	0	0	0	0	1	0	0	0	0	0	0	0	0	0	0	0	0	0	0	2	2.05623	0	1	0	0	0	0	0	0	0
CSNK2A1	casein kinase 2 alpha 1 polypeptide	0	0	1	0	0	0	0	0	0	0	0	1	0	0	0	0	0	0	0	0	0	0	0	0	0	0	0	0	0	0	0	0	0	0	0	0	0	2	1.83528	1	1	0	0	0	0	0	0	0
GHR	growth hormone receptor	0	0	1	0	0	0	0	0	0	0	0	0	0	0	0	0	0	0	0	0	0	0	0	0	0	0	0	1	0	0	0	0	0	0	0	0	0	2	1.54971	0	1	0	0	0	0	0	0	0
INPPL1	inositol polyphosphate phosphatase-like 1	0	0	1	0	0	0	0	0	0	0	0	0	0	0	0	0	0	1	0	0	0	0	0	0	0	0	0	0	0	0	0	0	0	0	0	0	0	2	1.34443	0	1	0	0	0	0	0	0	0
PTK2	PTK2 protein tyrosine kinase 2	0	0	1	0	0	0	0	0	0	0	0	0	0	0	0	0	0	1	0	0	0	0	0	0	0	0	0	0	0	0	0	0	0	0	0	0	0	2	1.23628	0	1	0	0	0	0	0	0	0
NFKBIA	nuclear factor of kappa light polypeptide gene enhancer in B-cells inhibitor al	0	0	1	1	0	0	0	0	0	0	0	0	0	0	0	0	0	0	0	0	0	0	0	0	0	0	0	0	0	0	0	0	0	0	0	0	0	2	1.20414	0	1	0	0	1	0	0	0	0
FKBP1A	FK506 binding protein 1A 12kDa	0	0	1	0	0	0	0	0	0	0	0	0	0	0	0	0	0	0	0	0	0	0	0	0	0	0	0	0	0	0	1	0	0	0	0	0	0	2	1.16151	0	1	0	0	0	0	0	0	0
CDC42	cell division cycle 42 (GTP binding protein 25kDa)	0	0	1	0	0	0	0	0	0	0	0	0	0	0	0	0	0	1	0	0	0	0	0	0	0	0	0	0	0	0	0	0	0	0	0	0	0	2	1.07177	0	1	0	0	0	0	0	0	0
PAK1	p21/Cdc42/Rac1-activated kinase 1 (STE20 homolog yeast)	0	0	1	0	0	0	0	0	0	0	0	0	0	0	0	0	0	1	0	0	0	0	0	0	0	0	0	0	0	0	0	0	0	0	0	0	0	2	1.05132	0	1	0	0	0	0	0	0	0
KLF5	Kruppel-like factor 5 (intestinal)	0	0	0	1	0	0	1	0	0	0	0	0	0	0	0	0	0	0	0	0	0	0	0	0	0	0	0	0	0	0	0	0	0	0	0	0	0	2	2.28153	0	0	0	0	1	0	0	0	0
NOLC1	nucleolar and coiled-body phosphoprotein 1	0	0	0	1	0	0	0	0	0	0	0	0	0	0	0	0	0	1	0	0	0	0	0	0	0	0	0	0	0	0	0	0	0	0	0	0	0	2	1.77645	0	1	0	0	1	0	0	0	0
MFHAS1	malignant fibrous histiocytoma amplified sequence 1	0	0	0	1	0	0	1	0	0	0	0	0	0	0	0	0	0	0	0	0	0	0	0	0	0	0	0	0	0	0	0	0	0	0	0	0	0	2	1.66324	0	0	0	0	1	0	0	0	0
VOF16		0	0	0	1	0	0	1	0	0	0	0	0	0	0	0	0	0	0	0	0	0	0	0	0	0	0	0	0	0	0	0	0	0	0	0	0	0	2	1.62113	0	0	0	0	1	0	0	0	0
RGD1308513		0	0	0	1	0	0	1	0	0	0	0	0	0	0	0	0	0	0	0	0	0	0	0	0	0	0	0	0	0	0	0	0	0	0	0	0	0	2	1.58557	0	0	0	0	1	0	0	0	0
SFRP2	secreted frizzled-related protein 2	0	0	0	1	0	0	0	0	0	0	0	1	0	0	0	0	0	0	0	0	0	0	0	0	0	0	0	0	0	0	0	0	0	0	0	0	0	2	1.57899	1	0	0	0	1	0	0	0	0
LOC679161		0	0	0	1	0	0	1	0	0	0	0	0	0	0	0	0	0	0	0	0	0	0	0	0	0	0	0	0	0	0	0	0	0	0	0	0	0	2	1.51572	0	0	0	0	1	0	0	0	0
RAP2A	RAP2A member of RAS oncogene family	0	0	0	1	0	0	0	0	0	0	0	0	0	0	0	0	0	0	0	0	0	0	0	0	0	0	0	0	0	1	0	0	0	0	0	0	0	2	1.49796	0	0	1	0	1	0	0	0	0
RGD1307234		0	0	0	1	0	0	1	0	0	0	0	0	0	0	0	0	0	0	0	0	0	0	0	0	0	0	0	0	0	0	0	0	0	0	0	0	0	2	1.47529	0	0	0	0	1	0	0	0	0
RGD1561967		0	0	0	1	0	0	1	0	0	0	0	0	0	0	0	0	0	0	0	0	0	0	0	0	0	0	0	0	0	0	0	0	0	0	0	0	0	2	1.47121	0	0	0	0	1	0	0	0	0
ITGA6	integrin alpha 6	0	0	0	1	0	0	1	0	0	0	0	0	0	0	0	0	0	0	0	0	0	0	0	0	0	0	0	0	0	0	0	0	0	0	0	0	0	2	1.45599	0	0	0	0	1	0	0	0	0
FARP1	FERM RhoGEF (ARHGEF) and pleckstrin domain protein 1 (chondrocyte-derived)	0	0	0	1	0	0	1	0	0	0	0	0	0	0	0	0	0	0	0	0	0	0	0	0	0	0	0	0	0	0	0	0	0	0	0	0	0	2	1.42603	0	0	0	0	1	0	0	0	0
LZTR2	leucine zipper transcription regulator 2	0	0	0	1	0	0	1	0	0	0	0	0	0	0	0	0	0	0	0	0	0	0	0	0	0	0	0	0	0	0	0	0	0	0	0	0	0	2	1.42208	0	0	0	0	1	0	0	0	0
SEC24D	SEC24 related gene family member D (S. cerevisiae)	0	0	0	1	0	0	1	0	0	0	0	0	0	0	0	0	0	0	0	0	0	0	0	0	0	0	0	0	0	0	0	0	0	0	0	0	0	2	1.41128	0	0	0	0	1	0	0	0	0
NTRK2	neurotrophic tyrosine kinase receptor type 2	0	0	0	1	0	0	1	0	0	0	0	0	0	0	0	0	0	0	0	0	0	0	0	0	0	0	0	0	0	0	0	0	0	0	0	0	0	2	1.38703	0	0	0	0	1	0	0	0	0
FNDC3A	fibronectin type III domain containing 3A	0	0	0	1	0	0	1	0	0	0	0	0	0	0	0	0	0	0	0	0	0	0	0	0	0	0	0	0	0	0	0	0	0	0	0	0	0	2	1.37554	0	0	0	0	1	0	0	0	0
MEST	mesoderm specific transcript homolog (mouse)	0	0	0	1	0	0	1	0	0	0	0	0	0	0	0	0	0	0	0	0	0	0	0	0	0	0	0	0	0	0	0	0	0	0	0	0	0	2	1.36699	0	0	0	0	1	0	0	0	0
NRP1	neuropilin 1	0	0	0	1	0	0	0	0	1	0	0	0	0	0	0	0	0	0	0	0	0	0	0	0	0	0	0	0	0	0	0	0	0	0	0	0	0	2	1.35097	0	0	0	0	1	0	1	0	0
TEC	tec protein tyrosine kinase	0	0	0	1	0	0	1	0	0	0	0	0	0	0	0	0	0	0	0	0	0	0	0	0	0	0	0	0	0	0	0	0	0	0	0	0	0	2	1.32225	0	0	0	0	1	0	0	0	0
CCND2	cyclin D2	0	0	0	1	0	0	0	0	0	0	0	1	0	0	0	0	0	0	0	0	0	0	0	0	0	0	0	0	0	0	0	0	0	0	0	0	0	2	1.31221	1	0	0	0	1	0	0	0	0
AGC1	aggrecan 1 (chondroitin sulfate proteoglycan 1 large aggregating proteoglycan	0	0	0	1	0	0	1	0	0	0	0	0	0	0	0	0	0	0	0	0	0	0	0	0	0	0	0	0	0	0	0	0	0	0	0	0	0	2	1.30224	0	0	0	0	1	0	0	0	0
RGD1307215		0	0	0	1	0	0	1	0	0	0	0	0	0	0	0	0	0	0	0	0	0	0	0	0	0	0	0	0	0	0	0	0	0	0	0	0	0	2	1.29594	0	0	0	0	1	0	0	0	0
DSCR1L1	Down syndrome critical region gene 1-like 1	0	0	0	1	0	0	1	0	0	0	0	0	0	0	0	0	0	0	0	0	0	0	0	0	0	0	0	0	0	0	0	0	0	0	0	0	0	2	1.29504	0	0	0	0	1	0	0	0	0
SNX7	sorting nexin 7	0	0	0	1	0	0	1	0	0	0	0	0	0	0	0	0	0	0	0	0	0	0	0	0	0	0	0	0	0	0	0	0	0	0	0	0	0	2	1.28521	0	0	0	0	1	0	0	0	0
GMEB2	glucocorticoid modulatory element binding protein 2	0	0	0	1	0	0	1	0	0	0	0	0	0	0	0	0	0	0	0	0	0	0	0	0	0	0	0	0	0	0	0	0	0	0	0	0	0	2	1.25788	0	0	0	0	1	0	0	0	0
LOC683626		0	0	0	1	0	0	1	0	0	0	0	0	0	0	0	0	0	0	0	0	0	0	0	0	0	0	0	0	0	0	0	0	0	0	0	0	0	2	1.25093	0	0	0	0	1	0	0	0	0
NFYB	nuclear transcription factor Y beta	0	0	0	1	0	0	1	0	0	0	0	0	0	0	0	0	0	0	0	0	0	0	0	0	0	0	0	0	0	0	0	0	0	0	0	0	0	2	1.24487	0	0	0	0	1	0	0	0	0
IDE	insulin-degrading enzyme	0	0	0	1	0	0	1	0	0	0	0	0	0	0	0	0	0	0	0	0	0	0	0	0	0	0	0	0	0	0	0	0	0	0	0	0	0	2	1.22774	0	0	0	0	1	0	0	0	0
RGD1310357		0	0	0	1	0	0	1	0	0	0	0	0	0	0	0	0	0	0	0	0	0	0	0	0	0	0	0	0	0	0	0	0	0	0	0	0	0	2	1.21083	0	0	0	0	1	0	0	0	0
ACVR1C		0	0	0	1	0	0	1	0	0	0	0	0	0	0	0	0	0	0	0	0	0	0	0	0	0	0	0	0	0	0	0	0	0	0	0	0	0	2	1.19086	0	0	0	0	1	0	0	0	0
MAN1A		0	0	0	1	0	0	1	0	0	0	0	0	0	0	0	0	0	0	0	0	0	0	0	0	0	0	0	0	0	0	0	0	0	0	0	0	0	2	1.17854	0	0	0	0	1	0	0	0	0
MYH9	myosin heavy chain 9 non-muscle	0	0	0	1	0	0	0	0	0	0	0	0	0	0	0	0	0	0	0	0	0	0	0	0	0	0	0	0	0	1	0	0	0	0	0	0	0	2	1.17854	0	0	1	0	1	0	0	0	0
ADCYAP1	adenylate cyclase activating polypeptide 1 (pituitary)	0	0	0	1	0	0	1	0	0	0	0	0	0	0	0	0	0	0	0	0	0	0	0	0	0	0	0	0	0	0	0	0	0	0	0	0	0	2	1.16878	0	0	0	0	1	0	0	0	0
RGD1560155		0	0	0	1	0	0	1	0	0	0	0	0	0	0	0	0	0	0	0	0	0	0	0	0	0	0	0	0	0	0	0	0	0	0	0	0	0	2	1.16716	0	0	0	0	1	0	0	0	0
RGD1563612		0	0	0	1	0	0	1	0	0	0	0	0	0	0	0	0	0	0	0	0	0	0	0	0	0	0	0	0	0	0	0	0	0	0	0	0	0	2	1.15429	0	0	0	0	1	0	0	0	0
CITED2	Cbp/p300-interacting transactivator with Glu/Asp-rich carboxy-terminal domain	0	0	0	1	0	0	1	0	0	0	0	0	0	0	0	0	0	0	0	0	0	0	0	0	0	0	0	0	0	0	0	0	0	0	0	0	0	2	1.15189	0	0	0	0	1	0	0	0	0
LOC686866		0	0	0	1	0	0	1	0	0	0	0	0	0	0	0	0	0	0	0	0	0	0	0	0	0	0	0	0	0	0	0	0	0	0	0	0	0	2	1.15029	0	0	0	0	1	0	0	0	0
LOC689377		0	0	0	1	0	0	1	0	0	0	0	0	0	0	0	0	0	0	0	0	0	0	0	0	0	0	0	0	0	0	0	0	0	0	0	0	0	2	1.15029	0	0	0	0	1	0	0	0	0
TIPARP	TCDD-inducible poly(ADP-ribose) polymerase	0	0	0	1	0	0	1	0	0	0	0	0	0	0	0	0	0	0	0	0	0	0	0	0	0	0	0	0	0	0	0	0	0	0	0	0	0	2	1.14472	0	0	0	0	1	0	0	0	0
TJP2	tight junction protein 2 (zona occludens 2)	0	0	0	1	0	0	1	0	0	0	0	0	0	0	0	0	0	0	0	0	0	0	0	0	0	0	0	0	0	0	0	0	0	0	0	0	0	2	1.13446	0	0	0	0	1	0	0	0	0
EHD4	EH-domain containing 4	0	0	0	1	0	0	1	0	0	0	0	0	0	0	0	0	0	0	0	0	0	0	0	0	0	0	0	0	0	0	0	0	0	0	0	0	0	2	1.1321	0	0	0	0	1	0	0	0	0
RGD1564804		0	0	0	1	0	0	1	0	0	0	0	0	0	0	0	0	0	0	0	0	0	0	0	0	0	0	0	0	0	0	0	0	0	0	0	0	0	2	0.911933	0	0	0	0	1	0	0	0	0
DPYSL5	dihydropyrimidinase-like 5	0	0	0	1	0	0	1	0	0	0	0	0	0	0	0	0	0	0	0	0	0	0	0	0	0	0	0	0	0	0	0	0	0	0	0	0	0	2	0.910039	0	0	0	0	1	0	0	0	0
GRIP2	glutamate receptor interacting protein 2	0	0	0	1	0	0	1	0	0	0	0	0	0	0	0	0	0	0	0	0	0	0	0	0	0	0	0	0	0	0	0	0	0	0	0	0	0	2	0.908778	0	0	1	1	1	0	0	1	0
EEF2K	eukaryotic elongation factor-2 kinase	0	0	0	1	0	0	1	0	0	0	0	0	0	0	0	0	0	0	0	0	0	0	0	0	0	0	0	0	0	0	0	0	0	0	0	0	0	2	0.901875	0	1	0	0	1	0	0	0	0
TRAIP	TRAF interacting protein	0	0	0	1	0	0	1	0	0	0	0	0	0	0	0	0	0	0	0	0	0	0	0	0	0	0	0	0	0	0	0	0	0	0	0	0	0	2	0.900002	0	0	0	0	1	0	0	0	0
LOC685909		0	0	0	1	0	0	1	0	0	0	0	0	0	0	0	0	0	0	0	0	0	0	0	0	0	0	0	0	0	0	0	0	0	0	0	0	0	2	0.899378	0	0	0	0	1	0	0	0	0
H2AFV	H2A histone family member V	0	0	0	1	0	0	1	0	0	0	0	0	0	0	0	0	0	0	0	0	0	0	0	0	0	0	0	0	0	0	0	0	0	0	0	0	0	2	0.899378	0	0	0	0	1	0	0	0	0
RGD1560813		0	0	0	1	0	0	1	0	0	0	0	0	0	0	0	0	0	0	0	0	0	0	0	0	0	0	0	0	0	0	0	0	0	0	0	0	0	2	0.899378	0	0	0	0	1	0	0	0	0
CATNA1		0	0	0	1	0	0	1	0	0	0	0	0	0	0	0	0	0	0	0	0	0	0	0	0	0	0	0	0	0	0	0	0	0	0	0	0	0	2	0.872968	0	0	0	0	1	0	0	0	0
LOC683729		0	0	0	1	0	0	1	0	0	0	0	0	0	0	0	0	0	0	0	0	0	0	0	0	0	0	0	0	0	0	0	0	0	0	0	0	0	2	0.866938	0	0	0	0	1	0	0	0	0
LOC689656		0	0	0	1	0	0	1	0	0	0	0	0	0	0	0	0	0	0	0	0	0	0	0	0	0	0	0	0	0	0	0	0	0	0	0	0	0	2	0.866938	0	0	0	0	1	0	0	0	0
PHYHIP	phytanoyl-CoA 2-hydroxylase interacting protein	0	0	0	1	0	0	1	0	0	0	0	0	0	0	0	0	0	0	0	0	0	0	0	0	0	0	0	0	0	0	0	0	0	0	0	0	0	2	0.855002	0	0	0	0	1	0	0	0	0
BPHL	biphenyl hydrolase-like (serine hydrolase; breast epithelial mucin-associated an	0	0	0	1	0	0	1	0	0	0	0	0	0	0	0	0	0	0	0	0	0	0	0	0	0	0	0	0	0	0	0	0	0	0	0	0	0	2	0.848508	0	0	0	0	1	0	0	0	0
LOC685284		0	0	0	1	0	0	1	0	0	0	0	0	0	0	0	0	0	0	0	0	0	0	0	0	0	0	0	0	0	0	0	0	0	0	0	0	0	2	0.845572	0	0	0	0	1	0	0	0	0
LOC683481		0	0	0	1	0	0	1	0	0	0	0	0	0	0	0	0	0	0	0	0	0	0	0	0	0	0	0	0	0	0	0	0	0	0	0	0	0	2	0.845572	0	0	0	0	1	0	0	0	0
SHMT1	serine hydroxymethyltransferase 1 (soluble)	0	0	0	1	0	0	1	0	0	0	0	0	0	0	0	0	0	0	0	0	0	0	0	0	0	0	0	0	0	0	0	0	0	0	0	0	0	2	0.82932	0	0	0	0	1	0	0	0	0
BICC1	bicaudal C homolog 1 (Drosophila)	0	0	0	1	0	0	1	0	0	0	0	0	0	0	0	0	0	0	0	0	0	0	0	0	0	0	0	0	0	0	0	0	0	0	0	0	0	2	0.82302	0	0	0	0	1	0	0	0	0
RGD1559896		0	0	0	1	0	0	1	0	0	0	0	0	0	0	0	0	0	0	0	0	0	0	0	0	0	0	0	0	0	0	0	0	0	0	0	0	0	2	0.816203	0	0	0	0	1	0	0	0	0
RGD1565043		0	0	0	1	0	0	1	0	0	0	0	0	0	0	0	0	0	0	0	0	0	0	0	0	0	0	0	0	0	0	0	0	0	0	0	0	0	2	0.79996	0	0	0	0	1	0	0	0	0
SH2D3C	SH2 domain containing 3C	0	0	0	1	0	0	1	0	0	0	0	0	0	0	0	0	0	0	0	0	0	0	0	0	0	0	0	0	0	0	0	0	0	0	0	0	0	2	0.788947	0	0	0	0	1	0	0	0	0
TRPC2		0	0	0	1	0	0	1	0	0	0	0	0	0	0	0	0	0	0	0	0	0	0	0	0	0	0	0	0	0	0	0	0	0	0	0	0	0	2	0.775931	0	0	0	0	1	0	0	0	0
TTC23	tetratricopeptide repeat domain 23	0	0	0	1	0	0	1	0	0	0	0	0	0	0	0	0	0	0	0	0	0	0	0	0	0	0	0	0	0	0	0	0	0	0	0	0	0	2	0.770571	0	0	0	0	1	0	0	0	0
RGD1562038		0	0	0	1	0	0	1	0	0	0	0	0	0	0	0	0	0	0	0	0	0	0	0	0	0	0	0	0	0	0	0	0	0	0	0	0	0	2	0.744839	0	0	0	0	1	0	0	0	0
RGD1563912		0	0	0	1	0	0	1	0	0	0	0	0	0	0	0	0	0	0	0	0	0	0	0	0	0	0	0	0	0	0	0	0	0	0	0	0	0	2	0.669892	0	0	0	0	1	0	0	0	0
RGD1559693		0	0	0	1	0	0	1	0	0	0	0	0	0	0	0	0	0	0	0	0	0	0	0	0	0	0	0	0	0	0	0	0	0	0	0	0	0	2	0.613442	0	0	0	0	1	0	0	0	0
CASK	calcium/calmodulin-dependent serine protein kinase (MAGUK family)	0	0	0	0	0	1	0	0	0	0	0	0	0	0	0	0	0	0	0	0	0	0	0	0	0	0	0	0	0	0	0	0	0	0	0	0	1	2	1.93321	0	0	0	1	0	0	0	0	0
SHANK2	SH3 and multiple ankyrin repeat domains 2	0	0	0	0	0	1	0	0	0	0	0	0	0	0	0	0	0	0	0	0	0	0	0	0	0	0	0	0	0	1	0	0	0	0	0	0	0	2	1.77522	0	0	1	1	1	0	0	0	0
RIMS1	regulating synaptic membrane exocytosis 1	0	0	0	0	0	1	0	0	0	0	0	0	0	0	0	0	0	0	1	0	0	0	0	0	0	0	0	0	0	0	0	0	0	0	0	0	0	2	1.61105	0	0	1	1	0	0	0	0	0
STXBP1	syntaxin binding protein 1	0	0	0	0	0	1	0	0	0	0	0	0	0	0	0	0	0	0	1	0	0	0	0	0	0	0	0	0	0	0	0	0	0	0	0	0	0	2	1.39862	0	0	1	1	0	0	0	0	0
DAG1	dystroglycan 1 (dystrophin-associated glycoprotein 1)	0	0	0	0	0	1	0	0	0	0	0	0	0	0	0	0	0	0	0	0	0	0	1	0	0	0	0	0	0	0	0	0	0	0	0	0	0	2	1.37268	0	0	0	1	0	0	0	0	0
NRXN3	neurexin 3	0	0	0	0	0	1	0	1	0	0	0	0	0	0	0	0	0	0	0	0	0	0	0	0	0	0	0	0	0	0	0	0	0	0	0	0	0	2	1.2544	0	0	0	1	0	0	0	0	0
STX6	syntaxin 6	0	0	0	0	0	1	1	0	0	0	0	0	0	0	0	0	0	0	0	0	0	0	0	0	0	0	0	0	0	0	0	0	0	0	0	0	0	2	1.25006	0	0	0	1	1	0	0	0	0
SYT1	synaptotagmin I	0	0	0	0	0	1	0	0	0	0	0	0	0	0	0	0	0	0	1	0	0	0	0	0	0	0	0	0	0	0	0	0	0	0	0	0	0	2	1.17772	0	0	1	1	0	0	0	0	0
APBA1	amyloid beta (A4) precursor protein-binding family A member 1 (X11)	0	0	0	0	0	1	0	0	0	0	0	0	0	0	0	0	0	0	0	0	0	0	0	0	0	0	0	0	0	0	0	0	0	0	0	0	1	2	1.17609	0	0	0	1	0	0	0	0	0
SLC6A3	solute carrier family 6 (neurotransmitter transporter dopamine) member 3	0	0	0	0	0	1	0	0	0	0	0	0	0	0	0	0	0	0	1	0	0	0	0	0	0	0	0	0	0	0	0	0	0	0	0	0	0	2	1.1704	0	0	1	1	0	0	0	0	0
SLC1A6	solute carrier family 1 (high affinity aspartate/glutamate transporter) member	0	0	0	0	0	1	0	0	0	0	0	0	0	0	0	0	0	0	1	0	0	0	0	0	0	0	0	0	0	0	0	0	0	0	0	0	0	2	1.11574	0	0	1	1	0	0	0	0	0
SEMA6A	sema domain transmembrane domain (TM) and cytoplasmic domain (semaphorin) 6A	0	0	0	0	0	0	1	0	1	0	0	0	0	0	0	0	0	0	0	0	0	0	0	0	0	0	0	0	0	0	0	0	0	0	0	0	0	2	2.75108	0	0	0	0	1	0	1	0	0
CAST	calpastatin	0	0	0	0	0	0	1	0	0	0	0	0	0	0	0	0	0	0	0	0	0	0	0	0	0	0	0	1	0	0	0	0	0	0	0	0	0	2	1.50733	0	0	0	0	1	0	0	0	0
LRRC4C	leucine rich repeat containing 4C	0	0	0	0	0	0	1	0	1	0	0	0	0	0	0	0	0	0	0	0	0	0	0	0	0	0	0	0	0	0	0	0	0	0	0	0	0	2	1.44293	0	0	0	0	1	0	1	0	0
SLIT2	slit homolog 2 (Drosophila)	0	0	0	0	0	0	1	0	1	0	0	0	0	0	0	0	0	0	0	0	0	0	0	0	0	0	0	0	0	0	0	0	0	0	0	0	0	2	1.41912	0	0	0	0	1	0	1	0	0
OMG	oligodendrocyte myelin glycoprotein	0	0	0	0	0	0	1	0	1	0	0	0	0	0	0	0	0	0	0	0	0	0	0	0	0	0	0	0	0	0	0	0	0	0	0	0	0	2	1.21251	0	0	0	0	1	0	1	0	0
EPHA7	EPH receptor A7	0	0	0	0	0	0	1	0	1	0	0	0	0	0	0	0	0	0	0	0	0	0	0	0	0	0	0	0	0	0	0	0	0	0	0	0	0	2	1.19582	0	0	0	0	1	0	1	0	0
CDH20	cadherin 20 type 2	0	0	0	0	0	0	1	0	0	0	0	0	0	0	0	0	0	0	0	0	0	0	0	0	0	0	0	0	0	0	0	0	0	0	0	1	0	2	1.06025	1	0	0	0	1	0	0	0	0
CDH8	cadherin 8 type 2	0	0	0	0	0	0	0	1	0	0	0	0	0	0	0	0	0	0	0	0	0	0	0	0	0	0	0	0	0	0	0	0	0	0	0	1	0	2	1.41519	1	0	0	0	0	0	0	0	0
PDE10A	phosphodiesterase 10A	0	0	0	0	0	0	0	1	0	0	0	0	0	0	0	0	0	0	0	0	0	0	0	0	0	0	1	0	0	0	0	0	0	0	0	0	0	2	1.40153	0	0	0	0	0	0	0	0	0
DDN	dendrin	0	0	0	0	0	0	0	1	0	0	0	0	0	0	0	0	0	0	0	0	0	0	0	0	0	0	0	1	0	0	0	0	0	0	0	0	0	2	1.25963	0	0	0	0	0	0	0	0	0
ROBO1	roundabout axon guidance receptor homolog 1 (Drosophila)	0	0	0	0	0	0	0	0	1	0	0	0	0	0	0	0	0	0	0	0	0	0	0	0	0	0	0	1	0	0	0	0	0	0	0	0	0	2	1.73628	0	0	0	0	0	0	1	0	0
EPHB2	EPH receptor B2	0	0	0	0	0	0	0	0	1	0	0	0	0	0	0	0	0	0	0	0	0	0	1	0	0	0	0	0	0	0	0	0	0	0	0	0	0	2	1.26138	0	0	0	0	1	0	1	0	0
SHC3	SHC (Src homology 2 domain containing) transforming protein 3	0	0	0	0	0	0	0	0	0	1	0	0	0	0	0	0	0	0	0	0	0	0	0	0	0	0	0	0	1	0	0	0	0	0	0	0	0	2	1.24143	0	1	0	0	0	0	0	0	0
IGF2	insulin-like growth factor 2 (somatomedin A)	0	0	0	0	0	0	0	0	0	1	1	0	0	0	0	0	0	0	0	0	0	0	0	0	0	0	0	0	0	0	0	0	0	0	0	0	0	2	1.22944	0	1	0	0	0	0	0	0	0
BCL2L1	BCL2-like 1	0	0	0	0	0	0	0	0	0	1	0	0	0	0	0	0	0	1	0	0	0	0	0	0	0	0	0	0	0	0	0	0	0	0	0	0	0	2	1.18181	0	1	0	0	0	0	0	0	0
PTPN1	protein tyrosine phosphatase non-receptor type 1	0	0	0	0	0	0	0	0	0	1	0	0	0	0	0	0	0	1	0	0	0	0	0	0	0	0	0	0	0	0	0	0	0	0	0	0	0	2	1.11806	0	1	0	0	0	0	0	0	0
CSNK1E	casein kinase 1 epsilon	0	0	0	0	0	0	0	0	0	0	0	1	0	0	0	0	0	0	0	0	0	0	0	0	0	0	0	0	0	0	0	0	0	0	0	1	0	2	1.95342	1	0	0	0	0	0	0	0	0
LRP6	low density lipoprotein receptor-related protein 6	0	0	0	0	0	0	0	0	0	0	0	1	0	0	0	0	0	0	0	0	0	0	0	0	0	0	0	0	0	0	0	0	0	0	1	0	0	2	1.71832	1	0	0	0	0	0	0	0	0
MAPK10	mitogen-activated protein kinase 10	0	0	0	0	0	0	0	0	0	0	0	1	0	0	0	0	0	0	0	0	0	0	1	0	0	0	0	0	0	0	0	0	0	0	0	0	0	2	1.5305	1	0	0	0	0	0	0	0	0
WNT5A	wingless-type MMTV integration site family member 5A	0	0	0	0	0	0	0	0	0	0	0	1	0	0	0	0	0	0	0	0	0	0	0	0	0	0	0	0	0	0	0	0	1	0	0	0	0	2	1.43594	1	0	0	0	0	0	0	0	0
WIF1	WNT inhibitory factor 1	0	0	0	0	0	0	0	0	0	0	0	1	0	0	0	0	0	0	0	0	0	0	0	0	0	0	0	0	0	0	0	0	1	0	0	0	0	2	1.32501	1	0	0	0	0	0	0	0	0
MAPK9	mitogen-activated protein kinase 9	0	0	0	0	0	0	0	0	0	0	0	1	0	0	0	0	0	0	0	0	0	0	1	0	0	0	0	0	0	0	0	0	0	0	0	0	0	2	1.15829	1	0	0	0	0	0	0	0	0
EP300	E1A binding protein p300	0	0	0	0	0	0	0	0	0	0	0	1	0	0	0	0	0	0	0	0	0	0	0	1	0	0	0	0	0	0	0	0	0	0	0	0	0	2	1.12506	1	0	0	0	0	0	0	0	1
VEGFA	vascular endothelial growth factor A	0	0	0	0	0	0	0	0	0	0	0	0	1	0	0	0	0	0	0	0	0	0	0	1	0	0	0	0	0	0	0	0	0	0	0	0	0	2	1.56049	0	0	0	0	0	0	0	0	1
PDE3A	phosphodiesterase 3A cGMP-inhibited	0	0	0	0	0	0	0	0	0	0	0	0	1	0	0	0	0	0	0	0	0	0	0	0	0	0	1	0	0	0	0	0	0	0	0	0	0	2	1.40932	0	0	0	0	0	0	0	0	0
PRKAR1A	protein kinase cAMP-dependent regulatory type I alpha (tissue specific extin	0	0	0	0	0	0	0	0	0	0	0	0	1	0	0	1	0	0	0	0	0	0	0	0	0	0	0	0	0	0	0	0	0	0	0	0	0	2	1.26488	0	0	1	0	0	0	0	0	0
SMAD1	SMAD family member 1	0	0	0	0	0	0	0	0	0	0	0	0	0	1	0	0	0	0	0	0	0	0	0	0	0	0	0	1	0	0	0	0	0	0	0	0	0	2	1.46612	0	0	0	0	0	0	0	0	0
TGFBR2	transforming growth factor beta receptor II (70/80kDa)	0	0	0	0	0	0	0	0	0	0	0	0	0	1	0	0	0	0	0	0	0	0	0	0	0	0	0	0	0	0	0	0	0	0	1	0	0	2	1.35566	1	0	0	0	0	0	0	0	0
TGFBR1	transforming growth factor beta receptor I (activin A receptor type II-like kin	0	0	0	0	0	0	0	0	0	0	0	0	0	1	0	0	0	0	0	0	0	0	0	0	0	0	0	0	0	0	0	0	0	0	1	0	0	2	1.3113	1	0	0	0	0	0	0	0	0
NRAS	neuroblastoma RAS viral (v-ras) oncogene homolog	0	0	0	0	0	0	0	0	0	0	0	0	0	0	1	0	0	0	0	0	0	0	0	0	0	0	0	0	1	0	0	0	0	0	0	0	0	2	1.72548	0	1	0	0	0	0	0	1	0
PLA2G4A	phospholipase A2 group IVA (cytosolic calcium-dependent)	0	0	0	0	0	0	0	0	0	0	0	0	0	0	1	0	0	0	0	0	0	0	0	0	0	0	0	0	0	1	0	0	0	0	0	0	0	2	1.24143	0	0	1	0	0	0	0	1	0
GNAQ	Guanine nucleotide binding protein (G protein) q polypeptide	0	0	0	0	0	0	0	0	0	0	0	0	0	0	1	0	0	0	0	0	0	0	1	0	0	0	0	0	0	0	0	0	0	0	0	0	0	2	1.20832	0	0	0	0	0	0	0	1	0
NOS1	nitric oxide synthase 1 (neuronal)	0	0	0	0	0	0	0	0	0	0	0	0	0	0	1	0	0	0	0	0	0	0	0	0	0	0	0	0	0	1	0	0	0	0	0	0	0	2	1.12117	0	0	1	0	0	0	0	1	0
GNB3	guanine nucleotide binding protein (G protein) beta polypeptide 3	0	0	0	0	0	0	0	0	0	0	0	0	0	0	0	0	0	0	1	1	0	0	0	0	0	0	0	0	0	0	0	0	0	0	0	0	0	2	1.7593	0	0	1	0	0	0	0	0	0
GNB2	guanine nucleotide binding protein (G protein) beta polypeptide 2	0	0	0	0	0	0	0	0	0	0	0	0	0	0	0	0	0	0	1	1	0	0	0	0	0	0	0	0	0	0	0	0	0	0	0	0	0	2	1.30405	0	0	1	0	0	0	0	0	0
GNG5	guanine nucleotide binding protein (G protein) gamma 5	0	0	0	0	0	0	0	0	0	0	0	0	0	0	0	0	0	0	1	1	0	0	0	0	0	0	0	0	0	0	0	0	0	0	0	0	0	2	1.22774	0	0	1	0	0	0	0	0	0
AP2A1	adaptor-related protein complex 2 alpha 1 subunit	0	0	0	0	0	0	0	0	0	0	0	0	0	0	0	0	0	0	1	1	0	0	0	0	0	0	0	0	0	0	0	0	0	0	0	0	0	2	1.18756	0	0	1	0	0	0	0	0	0
GNG8	guanine nucleotide binding protein (G protein) gamma 8	0	0	0	0	0	0	0	0	0	0	0	0	0	0	0	0	0	0	1	1	0	0	0	0	0	0	0	0	0	0	0	0	0	0	0	0	0	2	1.15509	0	0	1	0	0	0	0	0	0
NCALD	neurocalcin delta /// neurocalcin delta	0	0	0	0	0	0	0	0	0	0	0	0	0	0	0	0	0	0	1	1	0	0	0	0	0	0	0	0	0	0	0	0	0	0	0	0	0	2	1.12818	0	0	1	0	0	0	0	0	0
GNG7	guanine nucleotide binding protein (G protein) gamma 7	0	0	0	0	0	0	0	0	0	0	0	0	0	0	0	0	0	0	1	1	0	0	0	0	0	0	0	0	0	0	0	0	0	0	0	0	0	2	1.10957	0	0	1	0	0	0	0	0	0
CASP3	caspase 3 apoptosis-related cysteine peptidase	0	0	0	0	0	0	0	0	0	0	0	0	0	0	0	0	0	0	0	0	0	0	1	0	0	0	0	0	0	0	0	0	0	1	0	0	0	2	1.34723	0	1	0	0	0	0	0	0	0
NF1	neurofibromin 1 (neurofibromatosis von Recklinghausen disease Watson disease)	0	0	0	0	0	0	0	0	0	0	0	0	0	0	0	0	0	0	0	0	0	0	0	1	0	0	0	0	0	1	0	0	0	0	0	0	0	2	1.98343	0	0	1	0	0	0	0	0	1
CHRNA7	cholinergic receptor nicotinic alpha 7	0	0	0	0	0	0	0	0	0	0	0	0	0	0	0	0	0	0	0	0	0	0	0	1	0	0	0	1	0	0	0	0	0	0	0	0	0	2	1.8163	0	0	0	0	0	0	0	0	1
GABBR2	gamma-aminobutyric acid (GABA) B receptor 2	0	0	0	0	0	0	0	0	0	0	0	0	0	0	0	0	0	0	0	0	0	0	0	0	1	1	0	0	0	0	0	0	0	0	0	0	0	2	1.35566	0	0	0	0	0	0	0	1	0
CDH6	cadherin 6 type 2 K-cadherin (fetal kidney)	0	0	0	0	0	0	0	0	0	0	0	0	0	0	0	0	0	0	0	0	0	0	0	0	0	0	0	1	0	0	0	0	0	0	0	1	0	2	1.32134	1	0	0	0	0	0	0	0	0
PRKCE	protein kinase C epsilon	0	0	0	0	0	0	0	0	0	0	0	0	0	0	0	0	0	0	0	0	0	0	0	0	0	0	0	0	1	1	0	0	0	0	0	0	0	2	1.69466	0	1	1	0	0	0	0	0	0
EIF4G2	eukaryotic translation initiation factor 4 gamma 2 /// eukaryotic translation i	0	0	0	0	0	0	0	0	0	0	0	0	0	0	0	0	0	0	0	0	0	0	0	0	0	0	0	0	1	0	0	0	0	1	0	0	0	2	1.39185	0	1	0	0	0	0	0	0	0
EIF2S1	eukaryotic translation initiation factor 2 subunit 1 alpha 35kDa	0	0	0	0	0	0	0	0	0	0	0	0	0	0	0	0	0	0	0	0	0	0	0	0	0	0	0	0	1	0	0	0	0	1	0	0	0	2	1.35285	0	1	0	0	0	0	0	0	0
MAPK13	mitogen-activated protein kinase 13	0	0	0	0	0	0	0	0	0	0	0	0	0	0	0	0	0	0	0	0	0	0	0	0	0	0	0	0	1	0	0	1	0	0	0	0	0	2	1.22603	0	1	0	0	0	0	0	0	0
PPP4C	protein phosphatase 4 (formerly X) catalytic subunit	0	0	0	0	0	0	0	0	0	0	0	0	0	0	0	0	0	0	0	0	0	0	0	0	0	0	0	0	0	0	1	1	0	0	0	0	0	2	1.28076	0	1	0	0	0	0	0	0	0
TCF4	transcription factor 4	0	0	0	0	0	0	0	0	0	0	0	0	0	0	0	0	0	0	0	0	0	0	0	0	0	0	0	0	0	0	0	0	1	0	0	1	0	2	1.57899	1	0	0	0	0	0	0	0	0
TCF12	transcription factor 12 (HTF4 helix-loop-helix transcription factors 4)	0	0	0	0	0	0	0	0	0	0	0	0	0	0	0	0	0	0	0	0	0	0	0	0	0	0	0	0	0	0	0	0	1	0	0	1	0	2	1.56699	1	0	0	0	0	0	0	0	0
MAPRE1	microtubule-associated protein RP/EB family member 1	0	0	0	0	0	0	0	0	0	0	0	0	0	0	0	0	0	0	0	0	0	0	0	0	0	0	0	0	0	0	0	0	0	0	1	1	0	2	1.27015	1	0	0	0	0	0	0	0	0
[truncated: 2 more columns]
