# Supplementary material for: Gene Expression Profiling of a Hypoxic Seizure Model of Epilepsy Suggests a Role for mTOR and Wnt Signaling in Epileptogenesis
Source: PLoS One. 2013 Sep 27;8(9):e74428. doi: 10.1371/journal.pone.0074428 (PMC3785482; doi:10.1371/journal.pone.0074428)
Supplement: Table S1 — Enrichment analysis results for seven Wnt-relevant gene sets. This small gene set collection includes sets of transcriptional targets of the activated pathway, as well as two sets of genes in the signaling pathway itself. Only the WNT3A target gene set [28] showed significant enrichment (see Figure S20 in File S9 for KS plot). Column keys: ku = number of positive regulates in gene set; kd = number of negative regulatees in gene set; P-value = P-value from regulated KS test; FDR = false-discovery rate; the enrichment factors cLeft and cRight refer to slopes of the distribution functions in the KS plots (see Methods). (XLS) [file pone.0074428.s001.xls]

## Sheet: Sheet1
Gene set	ku	kd	P-value	FDR	cLeft	cRight	activation
WNT3A_activated_baljinnyam_klauzinska_saffo_2012	24	12	0.00582	0.04656	4.94677	1.99737	1
maguschak_ressler_WNT_signaling_2011	68	0	0.01348	0.05392	1.95614	1	1
Wnt_Signaling_Pathway_SA	81	0	0.02366	0.0630933	1.57123	1	1
WNT_StemCell_Fukuzawa09_114genes	41	0	0.03168	0.06336	2.38335	1	1
WNT_Colon_Ortega08_12genes	4	0	0.06728	0.107648	1	1.09394	-1
WNT_Stomach_Nojima07_73genes	44	0	0.64818	0.86424	1	1.21459	-1
WNT_StemCell_Fukuzawa09_33genes	13	0	0.6972	0.7968	1	1.39854	-1
WNT_CTNNB1_activated_boyer_yeh_zhang_2012	63	37	0.75712	0.75712	0.81091	0.724598	1
