# Supplementary material for: Gene Expression Profiling of a Hypoxic Seizure Model of Epilepsy Suggests a Role for mTOR and Wnt Signaling in Epileptogenesis
Source: PLoS One. 2013 Sep 27;8(9):e74428. doi: 10.1371/journal.pone.0074428 (PMC3785482; doi:10.1371/journal.pone.0074428)
Supplement: Table S2 — List of the 76 significantly modulated, pathway-relevant genes for the hypoxic seizure response. This set of genes is defined by the intersection of the HS response set of 1,399 genes determined by ANOVA, and the set of 261 leading-edge genes determined by the gene set enrichment analysis of the 12 h hippocampal response profile. The list is also provided in File S6, and expression ratios in File S2. (XLS) [file pone.0074428.s002.xls]

## Sheet: Sheet1
Gene	description	SUM	Wnt_signaling	IGF1_PI3K_mTOR	glutamatergic_NMDAR_II	Synaptic	NONE	Autism_associated	In_vitro_response_BIC_4AP	Axonal_guidance	glutamatergic_NMDAR_I	Hypoxia_response
PRKCA	protein kinase C alpha	5	1	1	1	0	0	0	1	0	1	0
SLC1A3	solute carrier family 1 (glial high affinity glutamate transporter) member 3	5	0	0	1	1	1	0	1	0	1	0
CTNNB1	catenin (cadherin-associated protein) beta 1 88kDa	4	1	1	1	1	0	0	0	0	0	0
GRIN2A	glutamate receptor ionotropic N-methyl D-aspartate 2A	4	0	0	1	1	1	0	0	0	1	0
GRIA2	glutamate receptor ionotropic AMPA 2	4	0	0	1	1	1	0	0	0	1	0
HOMER1	homer homolog 1 (Drosophila)	4	0	0	1	1	0	0	1	0	1	0
PPP2R1A	protein phosphatase 2 (formerly 2A) regulatory subunit A (PR 65) alpha isoform	4	1	1	1	0	0	0	0	0	1	0
APC	adenomatosis polyposis coli	3	1	1	0	0	1	0	0	0	0	0
GABRA4	gamma-aminobutyric acid (GABA) A receptor alpha 4	3	0	0	0	1	0	1	1	0	0	0
EPHA7	EPH receptor A7	3	0	0	0	0	1	0	1	1	0	0
PRKAR2A	protein kinase cAMP-dependent regulatory type II alpha	3	0	0	1	0	1	0	1	0	0	0
PIK3CA	phosphoinositide-3-kinase catalytic alpha polypeptide	3	0	1	1	0	1	0	0	0	0	0
PRKACB	protein kinase cAMP-dependent catalytic beta	3	1	0	1	0	1	0	0	0	0	0
CAMK2B	calcium/calmodulin-dependent protein kinase (CaM kinase) II beta	3	1	0	1	0	1	0	0	0	0	0
CALM3	calmodulin 3 (phosphorylase kinase delta)	3	0	1	1	0	1	0	0	0	0	0
CALM2	calmodulin 2 (phosphorylase kinase delta)	3	0	1	1	0	1	0	0	0	0	0
CAMK4	calcium/calmodulin-dependent protein kinase IV	3	0	1	1	0	1	0	0	0	0	0
SLC1A2	solute carrier family 1 (glial high affinity glutamate transporter) member 2	3	0	0	1	1	0	0	0	0	1	0
GRIA3	glutamate receptor ionotrophic AMPA 3	3	0	0	1	1	0	0	0	0	1	0
GJA1	gap junction protein alpha 1 43kDa (connexin 43)	3	1	1	0	1	0	0	0	0	0	0
SYT1	synaptotagmin I	3	0	0	1	1	1	0	0	0	0	0
CDH2	cadherin 2 type 1 N-cadherin (neuronal)	3	1	0	1	1	0	0	0	0	0	0
GSK3B	glycogen synthase kinase 3 beta	2	1	1	0	0	0	0	0	0	0	0
NLGN3	neuroligin 3	2	0	0	0	1	0	1	0	0	0	0
MAOA	monoamine oxidase A	2	0	0	1	0	0	1	0	0	0	0
SEMA6A	sema domain transmembrane domain (TM) and cytoplasmic domain (semaphorin) 6A	2	0	0	0	0	0	0	1	1	0	0
EPRS	glutamyl-prolyl-tRNA synthetase	2	1	0	0	0	0	0	1	0	0	0
PRKAR1A	protein kinase cAMP-dependent regulatory type I alpha (tissue specific extin	2	0	0	1	0	1	0	0	0	0	0
CDKN1B	cyclin-dependent kinase inhibitor 1B (p27 Kip1)	2	0	1	0	0	1	0	0	0	0	0
MDM2	Mdm2 transformed 3T3 cell double minute 2 p53 binding protein (mouse)	2	0	0	1	0	1	0	0	0	0	0
RYR2	ryanodine receptor 2 (cardiac)	2	0	0	0	1	1	0	0	0	0	0
CAST	calpastatin	2	0	0	0	0	1	0	1	0	0	0
SFRP2	secreted frizzled-related protein 2	2	1	0	0	0	0	0	1	0	0	0
KCNJ3	potassium inwardly-rectifying channel subfamily J member 3	2	0	0	0	1	0	0	1	0	0	0
STX6	syntaxin 6	2	0	0	0	1	0	0	1	0	0	0
GRM7	glutamate receptor metabotropic 7	2	0	0	0	0	1	0	0	0	1	0
GRIN3A	glutamate receptor ionotropic N-methyl-D-aspartate 3A	2	0	0	0	1	0	0	0	0	1	0
PRKCB1	Protein kinase C beta 1	2	0	1	1	0	0	0	0	0	0	0
KCNC2	Potassium voltage-gated channel Shaw-related subfamily member 2	2	0	0	0	1	1	0	0	0	0	0
CACNB4	calcium channel voltage-dependent beta 4 subunit	2	0	0	1	1	0	0	0	0	0	0
KCNIP4	Kv channel interacting protein 4	2	0	0	0	1	1	0	0	0	0	0
GNAQ	Guanine nucleotide binding protein (G protein) q polypeptide	2	0	0	0	0	1	0	0	0	1	0
NRAS	neuroblastoma RAS viral (v-ras) oncogene homolog	2	0	1	0	0	0	0	0	0	1	0
CSNK2A1	casein kinase 2 alpha 1 polypeptide	2	1	1	0	0	0	0	0	0	0	0
CREBBP	CREB binding protein (Rubinstein-Taybi syndrome)	2	1	0	0	0	0	0	0	0	0	1
ASAH1	N-acylsphingosine amidohydrolase (acid ceramidase) 1	2	0	1	0	0	1	0	0	0	0	0
CASK	calcium/calmodulin-dependent serine protein kinase (MAGUK family)	2	0	0	0	1	1	0	0	0	0	0
NF1	neurofibromin 1 (neurofibromatosis von Recklinghausen disease Watson disease)	2	0	0	1	0	0	0	0	0	0	1
PRKCE	protein kinase C epsilon	2	0	1	1	0	0	0	0	0	0	0
RIMS1	regulating synaptic membrane exocytosis 1	2	0	0	1	1	0	0	0	0	0	0
STXBP1	syntaxin binding protein 1	2	0	0	1	1	0	0	0	0	0	0
SMAD1	SMAD family member 1	1	0	0	0	0	1	0	0	0	0	0
DDN	dendrin	1	0	0	0	0	1	0	0	0	0	0
CITED2	Cbp/p300-interacting transactivator with Glu/Asp-rich carboxy-terminal domain	1	0	0	0	0	0	0	1	0	0	0
RGD1307234		1	0	0	0	0	0	0	1	0	0	0
KLF5	Kruppel-like factor 5 (intestinal)	1	0	0	0	0	0	0	1	0	0	0
SEC24D	SEC24 related gene family member D (S. cerevisiae)	1	0	0	0	0	0	0	1	0	0	0
TIPARP	TCDD-inducible poly(ADP-ribose) polymerase	1	0	0	0	0	0	0	1	0	0	0
RGD1308513		1	0	0	0	0	0	0	1	0	0	0
VOF16		1	0	0	0	0	0	0	1	0	0	0
RGD1561967		1	0	0	0	0	0	0	1	0	0	0
FNDC3A	fibronectin type III domain containing 3A	1	0	0	0	0	0	0	1	0	0	0
LOC679161		1	0	0	0	0	0	0	1	0	0	0
NFYB	nuclear transcription factor Y beta	1	0	0	0	0	0	0	1	0	0	0
RGD1562038		1	0	0	0	0	0	0	1	0	0	0
GABBR2	gamma-aminobutyric acid (GABA) B receptor 2	1	0	0	0	0	0	0	0	0	1	0
INSR	insulin receptor	1	0	1	0	0	0	0	0	0	0	0
PRKCI	protein kinase C iota	1	0	1	0	0	0	0	0	0	0	0
AKT3	v-akt murine thymoma viral oncogene homolog 3 (protein kinase B gamma)	1	0	1	0	0	0	0	0	0	0	0
EIF4E	eukaryotic translation initiation factor 4E	1	0	1	0	0	0	0	0	0	0	0
WNT5A	wingless-type MMTV integration site family member 5A	1	1	0	0	0	0	0	0	0	0	0
CSNK1E	casein kinase 1 epsilon	1	1	0	0	0	0	0	0	0	0	0
TCF4	transcription factor 4	1	1	0	0	0	0	0	0	0	0	0
EIF4EBP2	Eukaryotic translation initiation factor 4E binding protein 2	1	0	1	0	0	0	0	0	0	0	0
EIF4G2	eukaryotic translation initiation factor 4 gamma 2 /// eukaryotic translation i	1	0	1	0	0	0	0	0	0	0	0
EIF2S1	eukaryotic translation initiation factor 2 subunit 1 alpha 35kDa	1	0	1	0	0	0	0	0	0	0	0
